# Supplementary material for: Ruthenium(ii)-catalyzed oxidative dehydrogenation and hydroarylation of maleimides with phthalazinones – insights into additive-controlled product selectivity
Source: Royal Society of Chemistry journal article supplement (doi:10.1039/d3ob00297g), 2023-01-01

## Supporting information

### Ruthenium(II) catalyzed oxidative-dehydrogenation and hydroarylation of maleimides with phthalazinones - Insights into additive controlled product selectivity

Alagumalai Ramkumar,<sup>a</sup> Ramdas Sreedharan,<sup>a</sup> Purushothaman Rajeshwaran,<sup>a</sup> and Thirumanavelan Gandhi\*<sup>a</sup>

<sup>a</sup>Department of Chemistry, School of Advanced Sciences, Vellore Institute of Technology, Vellore, Tamil Nadu-632014, India.

#### Table of Contents

| Section | Title                                                                                                | Page no. |
|---------|------------------------------------------------------------------------------------------------------|----------|
| 1       | General experimental methods and materials and X-ray crystallography                                 | S2       |
| 2       | General procedure for synthesis of phthalazinones and 2-phenylisoquinolin-1(2H)-one                  | S2       |
| 3       | General Synthetic procedure                                                                          | S2       |
| 4       | Optimization table                                                                                   | S4       |
| 5       | Crystallographic data for <b>3h</b> and <b>4a</b>                                                    | S5       |
| 6       | Procedure for mechanistic studies and deuterium incorporation                                        | S12      |
| 7       | Characterization Data                                                                                | S15      |
| 8       | References                                                                                           | S27      |
| 9       | Copies of <sup>1</sup> H, <sup>13</sup> C and <sup>19</sup> F NMR spectra of synthesized derivatives | S28      |

## 1. General experimental methods and materials.

Unless otherwise mentioned all the reactions were carried out in screw capped reaction tubes (10 mL). Anhydrous CH<sub>3</sub>CN, DCE, TFE, EtOAc and DCM were purchased from commercial sources and used without further purification. Chemicals were purchased from Sigma-Aldrich, Alfa Aesar and AVRA. Thin layer chromatography was carried out on 250 mm diameter aluminium supported silica gel TLC plates (MERCK TLC Plates) and with narrow tip capillary. The products were purified by column chromatography using 100-200 mesh silica gel. <sup>1</sup>H NMR spectra were recorded on Bruker spectrometer (400 MHz) and reported in units ppm (parts per million) relative to the signals for residual chloroform (7.26 ppm) in the deuterated solvent. <sup>13</sup>C NMR spectra were recorded on Bruker spectrometer (100 MHz) and are reported in ppm relative to deuterated chloroform (77.23 ppm) with tetramethyl silane as an internal standard. Coupling constants (*J*) are reported in Hz; splitting patterns are assigned *s* = singlet, *d* = doublet, *t* = triplet, *q* = quartet, *dd* = doublet of doublet, *td* = triplet of doublet, *br* = broad signal. High-resolution mass spectra (HRMS) were performed on TOF-Q analyser.

### 1.1 X-ray crystallography of compounds **3h** and **4a**.

Single crystal X-ray structural data of the compounds **3h** and **4a** were collected on a CMOS based Bruker D8 Venture PHOTON 100 diffractometer equipped with a INCOATEC microfocus source with graphite monochromated Mo K $\alpha$  radiation ( $\lambda = 0.71073$  Å) operating at 50 kV and 30mA. The SAINT<sup>1</sup> program was used for the integration of diffraction profiles and absorption correction was applied with the SADABS<sup>2</sup> program. Both the structures were initially solved by SIR 92<sup>3</sup> and refined by the full matrix least squares method using SHELXL 2013<sup>4</sup> WinGX system, Ver2013.3.<sup>5</sup> The non-hydrogen atoms in all the structures were located using the difference Fourier map and refined anisotropically. The hydrogen atoms were fixed by HFIX and placed in ideal positions and included in the refinement process using a riding model with isotropic thermal parameters. All the crystallographic and structure refinement data of the compounds are summarized in section 5.

## 2. General procedure for synthesis of phthalazinones and 2-phenylisoquinolin-1(2H)-one.

Phthalazinones were synthesized using reported procedure.<sup>6</sup> 2-phenylisoquinolin-1(2H)-one was synthesized using reported procedure.<sup>7</sup>

## 3. General Synthetic procedure.

### 3.1 General procedure for Heck type product (Condition A).

In an oven-dried vial equipped with stir bar was charged with corresponding phthalazinone **1a** (0.45 mmol), corresponding maleimide **2a** (0.90 mmol), [RuCl<sub>2</sub>(*p*-cymene)]<sub>2</sub> (5 mol %), AgSbF<sub>6</sub> (30 mol %) and copper(II) acetate (2 equiv) in DCE and it was placed in a preheated oil bath at 120 °C and stirred for 12 h. After the mentioned time the reaction mixture was cooled to the ambient temperature and it was diluted with DCM and concentrated under reduced pressure. The crude was then purified by column chromatography on silica gel 100-200 mesh using hexane/ethyl acetate as the eluent.

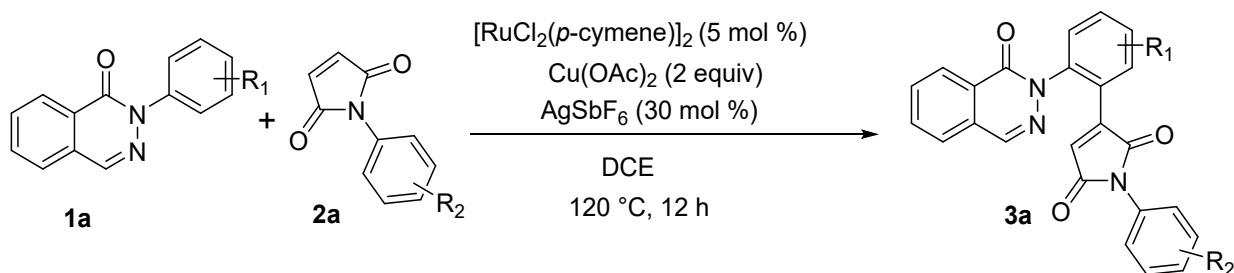

### 3.2 General procedure for alkylated product in water (Condition B).

In an oven-dried vial equipped with stir bar was charged with corresponding phthalazinone **1a** (0.45 mmol), corresponding maleimide **2a** (0.90 mmol),  $[\text{RuCl}_2(p\text{-cymene})]_2$  (5 mol %) and  $\text{AgSbF}_6$  (30 mol %) in  $\text{H}_2\text{O}$  and it was placed in a preheated oil bath at 120 °C and stirred for 12 h. After the mentioned time the reaction mixture was cooled to the ambient temperature and it was extracted with DCM and concentrated under reduced pressure. The crude was then purified by column chromatography on silica gel 100-200 mesh using hexane/ethyl acetate as the eluent.

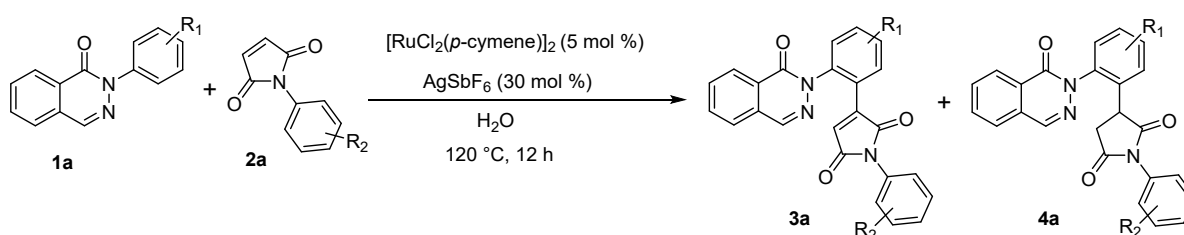

### 3.3 General procedure for exclusive alkylated product (Condition C).

In an oven-dried vial equipped with stir bar was charged with corresponding phthalazinone **1a** (0.45 mmol), corresponding maleimide **2a** (0.90 mmol),  $[\text{RuCl}_2(p\text{-cymene})]_2$  (5 mol %) and  $\text{AgSbF}_6$  (30 mol %) and TBHP (2 equiv) in DCE and it was placed in a preheated oil bath at 120 °C and stirred for 12 h. After the mentioned time the reaction mixture was cooled to the ambient temperature and it was diluted with DCM and concentrated under reduced pressure. The crude was then purified by column chromatography on silica gel 100-200 mesh using hexane/ethyl acetate as the eluent.

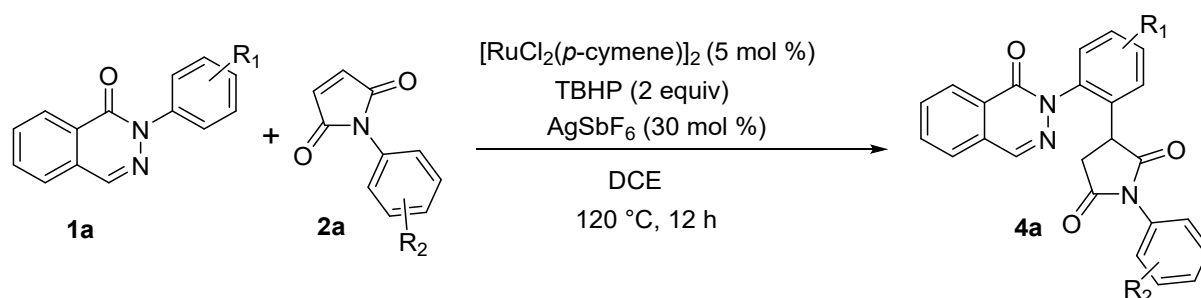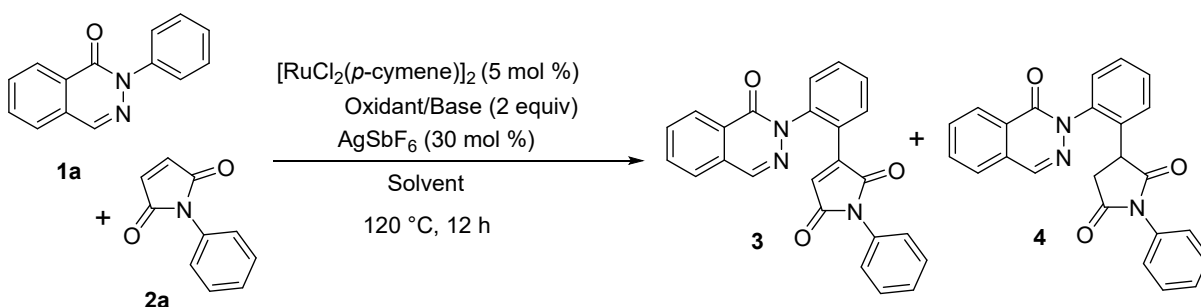

#### 4. Optimization table

| No | Catalyst                                               | Oxidant/Base                                | Additive                           | Solvent                                | Yield % <sup>b</sup> |           |
|----|--------------------------------------------------------|---------------------------------------------|------------------------------------|----------------------------------------|----------------------|-----------|
|    |                                                        |                                             |                                    |                                        | 3                    | 4         |
| 1  | $[\text{RuCl}_2(p\text{-cymene})]_2$                   | KOAc                                        | $\text{AgSbF}_6$                   | DCE                                    | 30                   | 34        |
| 2  | $[\text{RuCl}_2(p\text{-cymene})]_2$                   | $\text{Cu}(\text{OTf})_2$                   | $\text{AgSbF}_6$                   | DCE                                    | 33                   | 34        |
| 3  | $[\text{RuCl}_2(p\text{-cymene})]_2$                   | CuO                                         | $\text{AgSbF}_6$                   | DCE                                    | 30                   | 33        |
| 4  | $[\text{RuCl}_2(p\text{-cymene})]_2$                   | $\text{O}_2$                                | $\text{AgSbF}_6$                   | DCE                                    | 25                   | 25        |
| 5  | <b><math>[\text{RuCl}_2(p\text{-cymene})]_2</math></b> | <b><math>\text{Cu}(\text{OAc})_2</math></b> | <b><math>\text{AgSbF}_6</math></b> | <b>DCE</b>                             | <b>60</b>            | <b>0</b>  |
| 6  | $[\text{RuCl}_2(p\text{-cymene})]_2$                   | $\text{Cu}(\text{OAc})_2$                   | $\text{AgSbF}_6$                   | DCE                                    | 64 <sup>c</sup>      | 0         |
| 7  | $[\text{RuCl}_2(p\text{-cymene})]_2$                   | $\text{Cu}(\text{OAc})_2$                   | $\text{AgSbF}_6$                   | DCE                                    | 58 <sup>d</sup>      | 0         |
| 8  | $[\text{RuCl}_2(p\text{-cymene})]_2$                   | $\text{Cu}(\text{OAc})_2$                   | $\text{AgSbF}_6$                   | TFE                                    | 0                    | 0         |
| 9  | $[\text{RuCl}_2(p\text{-cymene})]_2$                   | $\text{Cu}(\text{OAc})_2$                   | $\text{AgSbF}_6$                   | EtOAc                                  | 0                    | 0         |
| 10 | $[\text{RuCl}_2(p\text{-cymene})]_2$                   | $\text{Cu}(\text{OAc})_2$                   | $\text{AgSbF}_6$                   | DCM                                    | 0                    | 0         |
| 11 | <b><math>[\text{RuCl}_2(p\text{-cymene})]_2</math></b> | <b>TBHP</b>                                 | <b><math>\text{AgSbF}_6</math></b> | <b>DCE</b>                             | <b>0</b>             | <b>65</b> |
| 12 | <b><math>[\text{RuCl}_2(p\text{-cymene})]_2</math></b> | -----                                       | <b><math>\text{AgSbF}_6</math></b> | <b><math>\text{H}_2\text{O}</math></b> | <b>15</b>            | <b>45</b> |

[a] Until and otherwise mentioned all the reactions were carried out with **1a** (0.45 mmol), **2a** (0.90 mmol),  $[\text{RuCl}_2(p\text{-cymene})]_2$  (5 mol %),  $\text{AgSbF}_6$  (30 mol %) in solvent 2 mL at 120 °C for 12 h. [b] Isolated yields. [c] Reaction stirred for 24 h. [d] Reaction carried out at 150 °C.

### 5.1. Crystallographic data for 3h

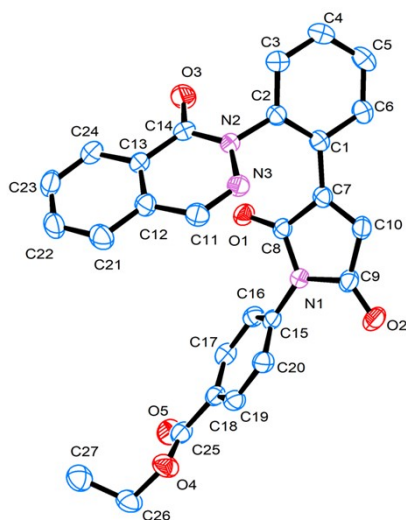

**Fig S1.** Perspective view of the X-ray structure of **3h**. Hydrogen atoms are omitted for clarity.

|                   |                                                               |
|-------------------|---------------------------------------------------------------|
| <b>Compound</b>   | <b>3h</b>                                                     |
| CCDC No.          | 2216957                                                       |
| Empirical formula | C <sub>27</sub> H <sub>19</sub> N <sub>3</sub> O <sub>5</sub> |
| Formula weight    | 465.46 g/mol                                                  |
| Temperature/K     | 293(2)                                                        |
| Crystal system    | Monoclinic                                                    |
| Wavelength        | 0.71073                                                       |
| Space group       | P 1 2 <sub>1</sub> /n 1                                       |
| a/Å               | 13.934(4)                                                     |
| b/Å               | 7.1249(19)                                                    |
| c/Å               | 23.124(6)                                                     |
| $\alpha$ /°       | 90                                                            |
| $\beta$ /°        | 102.776(8)                                                    |

|                                                 |                       |
|-------------------------------------------------|-----------------------|
| $\gamma/^\circ$                                 | 90                    |
| Volume                                          | 2238.9(10)            |
| Z                                               | 4                     |
| Calculated density g/cm <sup>3</sup>            | 1.375                 |
| Absorption coefficient ( $\mu/\text{mm}^{-1}$ ) | 0.095                 |
| F(000)                                          | 964                   |
|                                                 | -16 $\leq h \leq$ 16, |
| Index ranges                                    | -8 $\leq k \leq$ 8,   |
|                                                 | -27 $\leq l \leq$ 27  |
| Reflections collected                           | 50858                 |
| Independent reflections                         | 3981                  |
| Data/restraint/parameters                       | 3981 / 0 / 317        |
| Goodness of fit on F <sup>2</sup>               | 0.943                 |
| Final R indices [ $I > 2\sigma(I)$ ]            | R1 = 0.0459           |
|                                                 | wR2 = 0.1107          |
| Final R indices [all data]                      | R1 = 0.0549           |
|                                                 | wR2 = 0.1178          |

### Bond distance

| Atom | Atom | Distance Å | Atom | Atom | Distance Å |
|------|------|------------|------|------|------------|
| O1   | C8   | 1.206(2)   | O2   | C9   | 1.201(2)   |
| O3   | C14  | 1.206(2)   | O4   | C25  | 1.335(3)   |
| O4   | C26  | 1.451(2)   | O5   | C25  | 1.205(2)   |
| N1   | C8   | 1.395(2)   | N1   | C9   | 1.403(2)   |
| N1   | C15  | 1.426(2)   | N2   | C14  | 1.382(2)   |

|     |     |          |     |     |          |
|-----|-----|----------|-----|-----|----------|
| N2  | N3  | 1.388(2) | N2  | C2  | 1.438(2) |
| N3  | C11 | 1.291(2) | C1  | C2  | 1.396(3) |
| C1  | C6  | 1.395(3) | C1  | C7  | 1.474(3) |
| C2  | C3  | 1.383(3) | C3  | C4  | 1.375(3) |
| C4  | C5  | 1.380(3) | C5  | C6  | 1.381(3) |
| C7  | C10 | 1.329(3) | C7  | C8  | 1.502(3) |
| C9  | C10 | 1.475(3) | C11 | C12 | 1.432(3) |
| C12 | C13 | 1.392(3) | C12 | C21 | 1.407(3) |
| C13 | C24 | 1.383(3) | C13 | C14 | 1.465(3) |
| C15 | C16 | 1.388(3) | C15 | C20 | 1.384(3) |
| C16 | C17 | 1.383(3) | C17 | C18 | 1.387(3) |
| C18 | C19 | 1.388(3) | C18 | C25 | 1.495(3) |
| C19 | C20 | 1.376(3) | C21 | C22 | 1.368(3) |
| C22 | C23 | 1.380(4) | C23 | C24 | 1.367(3) |
| C26 | C27 | 1.496(3) |     |     |          |

### Bond angles

| Atom | Atom | Atom | Angle [°]  | Atom | Atom | Atom | Angle [°]  |
|------|------|------|------------|------|------|------|------------|
| O5   | C25  | O4   | 124.2(2)   | O5   | C25  | C18  | 124.0(2)   |
| O4   | C26  | C27  | 111.37(19) | O4   | C25  | C18  | 111.75(17) |
| O3   | C14  | N2   | 120.69(17) | O3   | C14  | C13  | 124.12(19) |
| O2   | C9   | N1   | 125.32(17) | O2   | C9   | C10  | 128.16(17) |
| O1   | C8   | N1   | 125.59(17) | O1   | C8   | C7   | 128.16(17) |
| N3   | N2   | C2   | 113.69(14) | N3   | C11  | C12  | 125.10(18) |
| N2   | C14  | C13  | 115.19(17) | N1   | C9   | C10  | 105.78(15) |

|     |     |     |            |     |     |     |            |
|-----|-----|-----|------------|-----|-----|-----|------------|
| N1  | C8  | C7  | 106.24(15) | C9  | N1  | C15 | 125.59(15) |
| C8  | N1  | C9  | 110.07(15) | C8  | N1  | C15 | 124.33(14) |
| C7  | C10 | C9  | 110.21(17) | C6  | C1  | C7  | 118.14(16) |
| C4  | C5  | C6  | 119.35(19) | C4  | C3  | C2  | 120.41(19) |
| C3  | C4  | C5  | 120.3(2)   | C3  | C2  | N2  | 118.38(16) |
| C3  | C2  | C1  | 120.51(17) | C2  | C1  | C7  | 123.86(16) |
| C2  | C1  | C6  | 117.88(17) | C25 | O4  | C26 | 117.17(18) |
| C24 | C23 | C22 | 121.2(2)   | C24 | C13 | C14 | 120.95(19) |
| C23 | C24 | C13 | 119.4(2)   | C23 | C22 | C21 | 120.2(2)   |
| C22 | C21 | C12 | 119.8(2)   | C21 | C12 | C11 | 122.76(19) |
| C20 | C15 | N1  | 119.42(2)  | C1  | C7  | C8  | 124.45(16) |
| C1  | C6  | C5  | 121.57(19) | C1  | C2  | N2  | 121.08(16) |
| C19 | C18 | C25 | 121.80(19) | C19 | C18 | C17 | 119.24(18) |
| C18 | C19 | C20 | 120.42(19) | C18 | C17 | C16 | 120.71(18) |
| C17 | C18 | C25 | 118.83(18) | C16 | C15 | N1  | 120.02(17) |
| C16 | C15 | C20 | 120.53(18) | C15 | C20 | C19 | 119.81(18) |
| C15 | C16 | C17 | 119.24(18) | C14 | N3  | N3  | 126.24(15) |
| C14 | N2  | C2  | 119.66(15) | C13 | C12 | C21 | 119.12(15) |
| C13 | C12 | C11 | 118.11(17) | C12 | C13 | C24 | 120.15(19) |
| C12 | C13 | C14 | 118.88(17) | C11 | N3  | N2  | 116.19(16) |
| C10 | C7  | C8  | 107.54(16) |     |     |     |            |

## 5.2. Crystallographic data for 4a

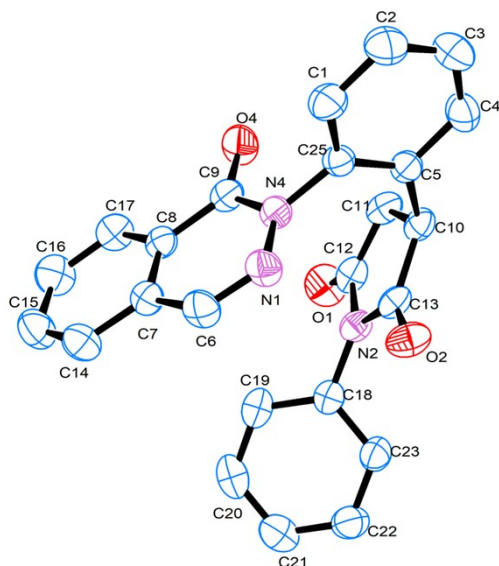

**Fig S2.** Perspective view of the X-ray structure of **4a**. Hydrogen atoms are omitted for clarity.

|                   |                                                               |
|-------------------|---------------------------------------------------------------|
| <b>Compound</b>   | <b>4a</b>                                                     |
| CCDC No.          | 2232967                                                       |
| Empirical formula | C <sub>24</sub> H <sub>17</sub> N <sub>3</sub> O <sub>3</sub> |
| Formula weight    | 395.40 g/mol                                                  |
| Temperature/K     | 300(2)                                                        |
| Crystal system    | Monoclinic                                                    |
| Wavelength        | 0.71073                                                       |
| Space group       | P 1 21/c 1                                                    |
| a/Å               | 10.4045(9)                                                    |
| b/Å               | 8.8690(8)                                                     |
| c/Å               | 21.6415(17)                                                   |
| $\alpha$ /°       | 90                                                            |

|                                                 |                        |
|-------------------------------------------------|------------------------|
| $\beta/^\circ$                                  | 102.176(2)             |
| $\gamma/^\circ$                                 | 90                     |
| Volume                                          | 1952.1(3)              |
| Z                                               | 4                      |
| Calculated density g/cm <sup>3</sup>            | 1.345                  |
| Absorption coefficient ( $\mu/\text{mm}^{-1}$ ) | 0.091                  |
| F(000)                                          | 824                    |
|                                                 | $-11 \leq h \leq 13$ , |
| Index ranges                                    | $-11 \leq k \leq 11$ , |
|                                                 | $-28 \leq l \leq 28$   |
| Reflections collected                           | 36983                  |
| Independent reflections                         | 4825                   |
| Data/restraint/parameters                       | 4825 / 0 / 271         |
| Goodness of fit on F <sup>2</sup>               | 1.047                  |
| Final R indices [ $I > 2\sigma(I)$ ]            | R1 = 0.0501            |
|                                                 | wR2 = 0.1004           |
| Final R indices [all data]                      | R1 = 0.1012            |
|                                                 | wR2 = 0.1224           |

### Bond distance

| Atom | Atom | Distance Å | Atom | Atom | Distance Å |
|------|------|------------|------|------|------------|
| O1   | C12  | 1.212(2)   | O2   | C13  | 1.203(2)   |
| O4   | C9   | 1.220(2)   | N1   | C6   | 1.285(2)   |
| N1   | N4   | 1.3919(19) | N2   | C13  | 1.391(2)   |
| N2   | C12  | 1.393(2)   | N2   | C18  | 1.436(2)   |

|     |     |          |     |     |           |
|-----|-----|----------|-----|-----|-----------|
| N4  | C9  | 1.374(2) | N4  | C25 | 1.446(2)  |
| C1  | C2  | 1.373(3) | C1  | C25 | 1.382(2)  |
| C2  | C3  | 1.366(3) | C3  | C4  | 1.382(3)  |
| C4  | C5  | 1.392(2) | C5  | C25 | 1.389(2)  |
| C5  | C10 | 1.515(2) | C6  | C7  | 1.432(2)  |
| C7  | C8  | 1.389(2) | C7  | C14 | 1.400(3)  |
| C8  | C17 | 1.379(2) | C8  | C9  | 1.465(2)  |
| C10 | C13 | 1.513(2) | C10 | C11 | 1.529(2)  |
| C11 | C12 | 1.482(3) | C14 | C15 | 1.374(3)) |
| 15  | C16 | 1.380(3) | C16 | C17 | 1.371(3)  |
| C18 | C23 | 1.373(2) | C18 | C19 | 1.381(2)  |
| C19 | C20 | 1.386(3) | C20 | C21 | 1.376(3)  |
| C20 | C22 | 1.368(3) | C22 | C23 | 1.381(3)  |

### Bond angle

| Atom | Atom | Atom | Angle [°]  | Atom | Atom | Atom | Angle [°]  |
|------|------|------|------------|------|------|------|------------|
| C6   | N1   | N4   | 116.44(14) | C13  | N2   | C12  | 112.40(15) |
| C13  | N2   | C18  | 123.40(14) | C12  | N2   | C18  | 124.09(15) |
| C9   | N4   | N1   | 125.62(14) | C9   | N4   | C25  | 119.17(15) |
| N1   | N4   | C25  | 113.73(13) | C2   | C1   | C25  | 120.53(18) |
| C3   | C2   | C1   | 119.18(19) | C2   | C3   | C4   | 120.6(2)   |
| C3   | C4   | C5   | 121.41(19) | C25  | C5   | C4   | 116.93(16) |
| C25  | C2   | C10  | 124.22(16) | C4   | C5   | C10  | 118.81(16) |
| N1   | C6   | C7   | 125.15(17) | C8   | C7   | C14  | 119.31(17) |
| C8   | C7   | C6   | 118.11(16) | C14  | C7   | C6   | 122.58(17) |

|     |     |      |            |     |     |     |            |
|-----|-----|------|------------|-----|-----|-----|------------|
| C17 | C8  | C7   | 120.63(17) | C17 | C8  | C9  | 120.68(16) |
| C7  | C8  | C9   | 118.67(15) | O4  | C9  | N4  | 120.55(17) |
| O4  | C9  | C8   | 123.69(16) | N4  | C9  | C8  | 115.76(15) |
| C13 | C10 | C5   | 115.02(14) | C13 | C10 | C11 | 104.40(14) |
| C5  | C10 | C11  | 115.76(14) | C12 | C11 | C10 | 105.73(14) |
| O1  | C12 | N2   | 123.48(18) | O1  | C12 | C11 | 127.77(59) |
| N2  | C12 | C11  | 108.74(15) | O2  | C13 | N2  | 124.59(17) |
| O2  | C13 | C10  | 127.12(16) | N2  | C13 | C10 | 108.26(14) |
| C15 | C14 | C7   | 119.47(19) | C14 | C15 | C16 | 120.3(2)   |
| C17 | C16 | C15  | 120.8(2)   | C16 | C17 | C8  | 119.40(19) |
| C23 | C18 | C19  | 120.50(18) | C23 | C18 | N2  | 119.40(16) |
| C19 | C18 | N2   | 120.10(16) | C18 | C19 | C20 | 119.22(19) |
| C21 | C20 | C19  | 120.14(19) | C22 | C21 | C20 | 120.2(2)   |
| C21 | C22 | C123 | 120.21(19) | C18 | C23 | C22 | 119.76(18) |
| C1  | C25 | C5   | 121.33(16) | C1  | C25 | N4  | 116.44(15) |
| C5  | C25 | N4   | 122.23(15) |     |     |     |            |

### 6.1. Mechanistic studies (H/D exchange reaction):

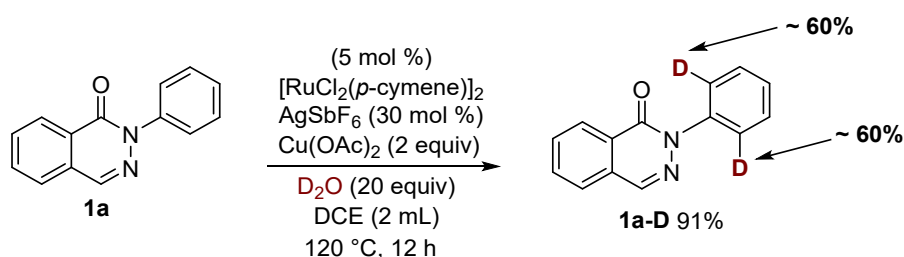

In an oven-dried vial equipped with stir bar was charged with phthalazinone **1a** (0.45 mmol),  $[\text{RuCl}_2(p\text{-cymene})]_2$  (5 mol %),  $\text{AgSbF}_6$  (30 mol %),  $\text{Cu}(\text{OAc})_2$  (2 equiv) and  $\text{D}_2\text{O}$  (20 equiv). To this mixture DCE (2 mL) was added. The vial was tightly capped and placed in a pre-heated oil bath at 120 °C. After 12 h, the reaction mixture was cooled to the ambient temperature and it was diluted with DCM and concentrated under reduced pressure. The crude was then purified by column chromatography on silica gel 100-200 mesh using hexane/ethyl acetate as the eluent.

## 6.2. Deuterium incorporation reaction

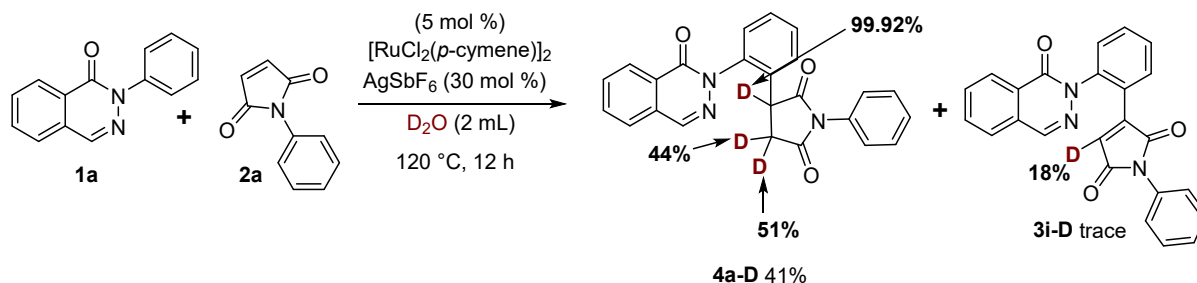

In an oven-dried vial equipped with stir bar was charged with phthalazinone **1a** (0.45 mmol), maleimide **2a** (0.90 mmol),  $[RuCl_2(p\text{-cymene})]_2$  (5 mol %),  $AgSbF_6$  (30 mol %). To this mixture  $D_2O$  (2 mL) was added. The vial was tightly capped and placed in a pre-heated oil bath at  $120\text{ }^\circ\text{C}$ . After 12 h, the reaction mixture was cooled to the ambient temperature and it was diluted with DCM and concentrated under reduced pressure. The crude was then purified by column chromatography on silica gel 100-200 mesh using hexane/ethyl acetate as the eluent.

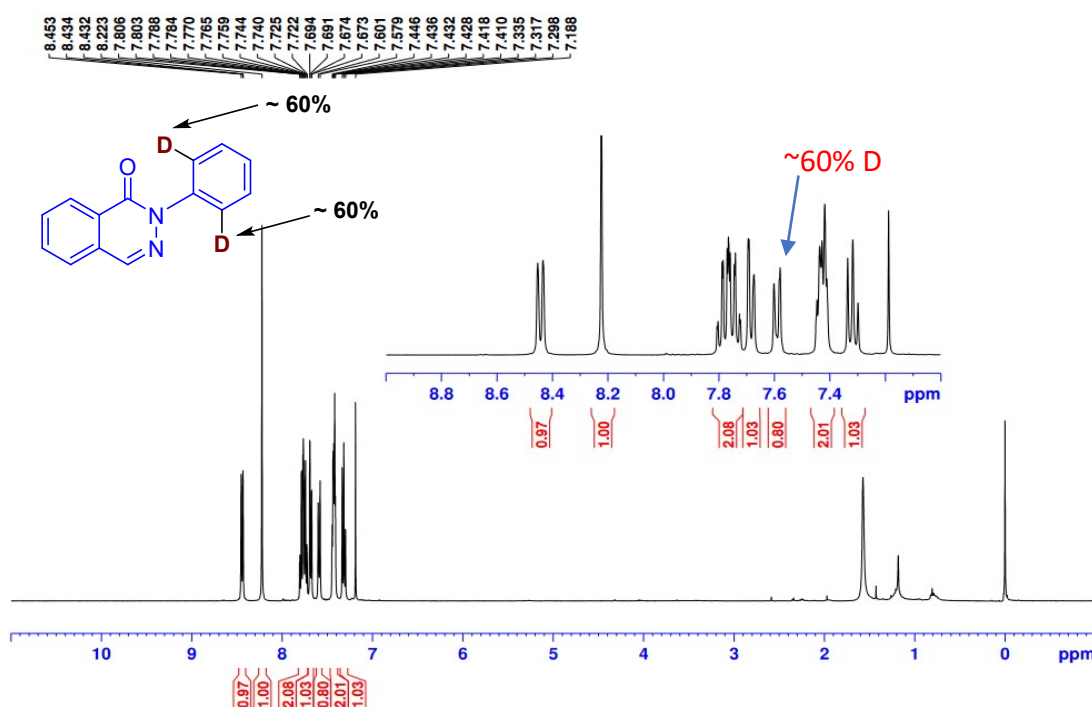



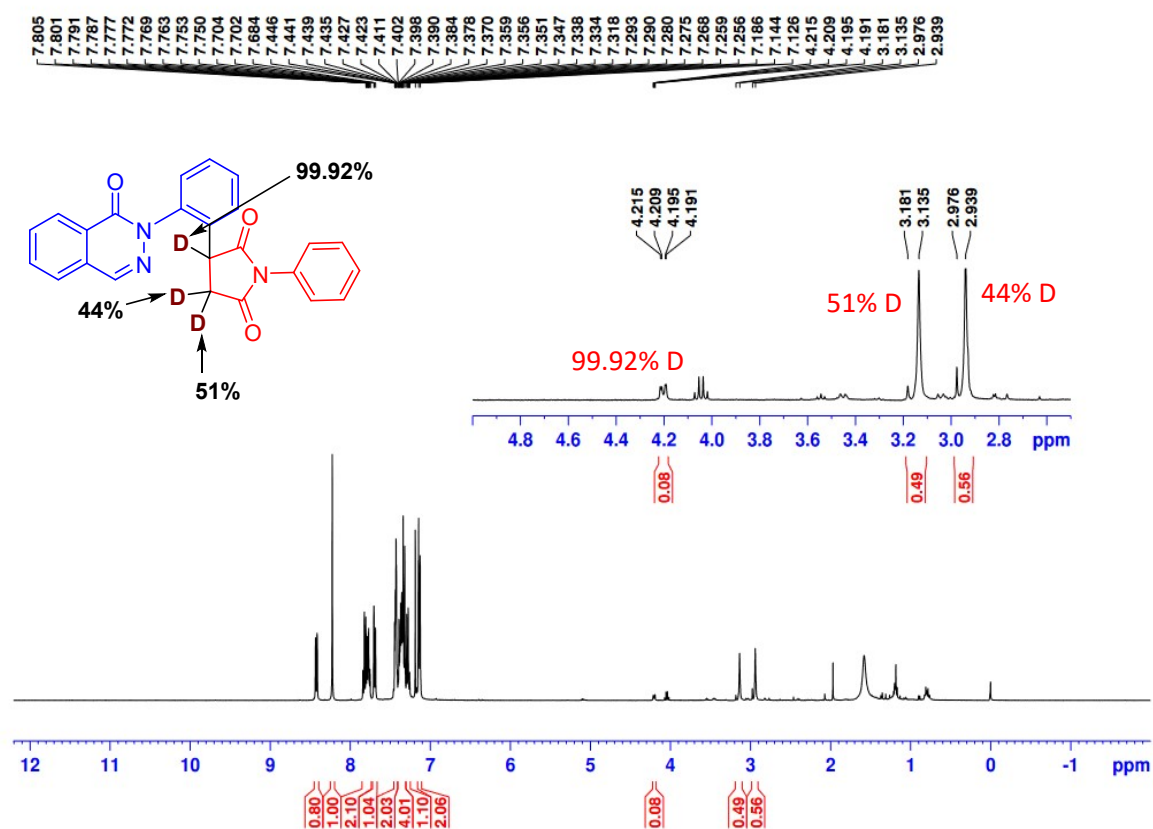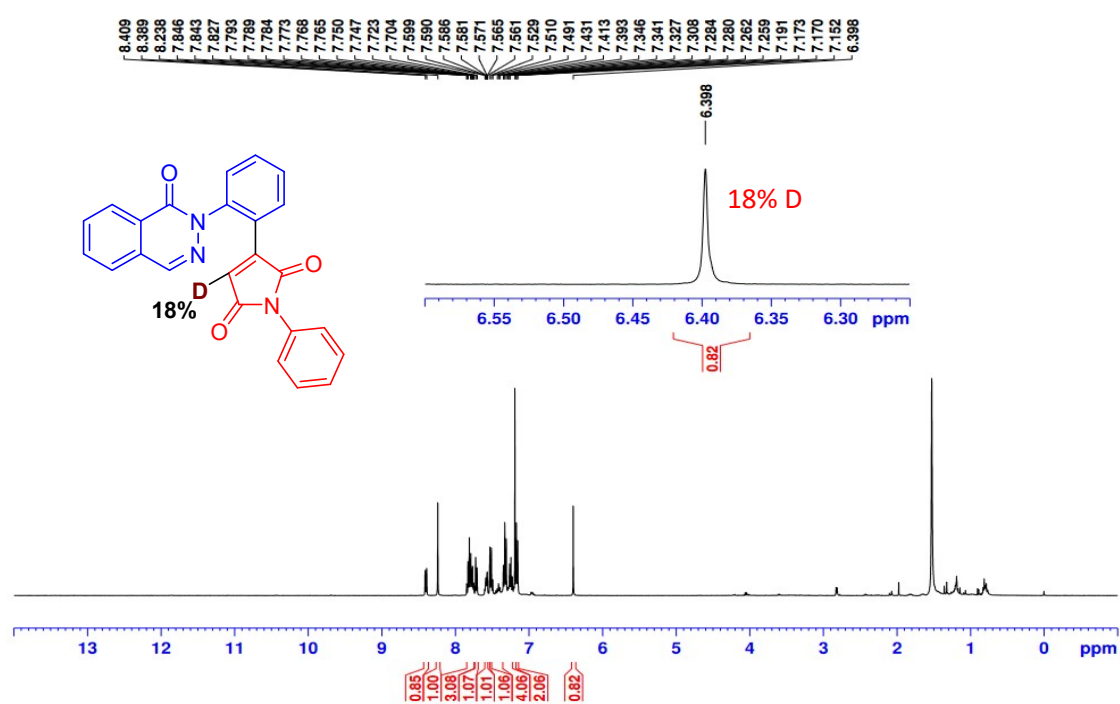

## 7. Characterization Data

### 3-(5-methyl-2-(1-oxophthalazin-2(1H)-yl)phenyl)-1-phenyl-1H-pyrrole-2,5-dione (3a)

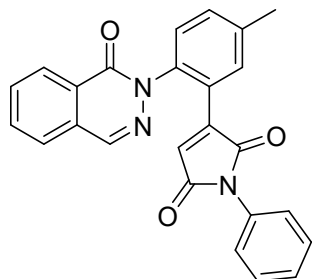

Purified by column chromatography on silica gel using hexane/ethylacetate (70/30)

**Yield:** 60% from Condition A, Off-white coloured solid

**<sup>1</sup>H NMR (400 MHz, CDCl<sub>3</sub>) δ:** 8.39 (d, *J* = 7.8 Hz, 1H), 8.21 (s, 1H), 7.82–7.72 (m, 2H), 7.70 (d, *J* = 7.72 Hz, 1H), 7.60 (s, 1H), 7.39–7.36 (m, 2H), 7.33–7.29 (m, 2H), 7.25–7.21 (m, 1H), 7.18–7.15 (m, 2H), 6.35 (s, 1H), 2.40 (s, 3H).

**<sup>13</sup>C NMR (100 MHz, CDCl<sub>3</sub>) δ:** 169.1, 168.6, 159.4, 142.9, 139.0, 138.8, 138.3, 133.8, 132.3, 132.1, 131.5, 131.4, 129.6, 128.9, 128.5, 128.1, 127.7, 127.3, 127.0, 126.4, 126.0, 125.8, 21.2.

**HRMS (ESI) m/z:** [M+Na]<sup>+</sup> Calculated for C<sub>25</sub>H<sub>17</sub>N<sub>3</sub>O<sub>3</sub>Na, 430.1162; Found 430.1172.

### 3-(5-(tert-butyl)-2-(1-oxophthalazin-2(1H)-yl)phenyl)-1-phenyl-1H-pyrrole-2,5-dione (3b)

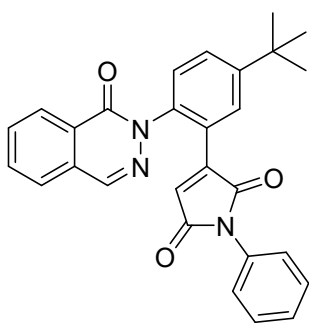

Purified by column chromatography on silica gel using hexane/ethylacetate (70/30)

**Yield:** 50% from Condition A, Off-white coloured solid

**<sup>1</sup>H NMR (400 MHz, CDCl<sub>3</sub>) δ:** 8.48 (d, *J* = 7.76 Hz, 1H), 8.29 (s, 1H), 7.90–7.81 (m, 3H), 7.78 (d, *J* = 7.64 Hz, 1H), 7.66 (d, *J* = 8.28 Hz, 1H), 7.51 (d, *J* = 8.44 Hz, 1H), 7.42–7.38 (m, 2H), 7.33–7.31 (m, 1H), 7.26–7.24 (m, 2H), 6.44 (s, 1H), 1.40 (s, 9H).

**<sup>13</sup>C NMR (100 MHz, CDCl<sub>3</sub>) δ:** 169.2, 168.7, 159.4, 152.0, 143.1, 138.8, 138.2, 133.8, 132.3, 131.4, 129.6, 129.0, 128.6, 128.3, 128.2, 128.2, 127.7, 127.3, 126.8, 126.4, 126.0, 125.4, 34.9, 31.2.

**HRMS (ESI) m/z:** [M+Na]<sup>+</sup> Calculated for C<sub>28</sub>H<sub>23</sub>N<sub>3</sub>O<sub>3</sub>Na, 472.1632; Found 472.1647.

### 3-(5-fluoro-2-(1-oxophthalazin-2(1H)-yl)phenyl)-1-phenyl-1H-pyrrole-2,5-dione (3c)

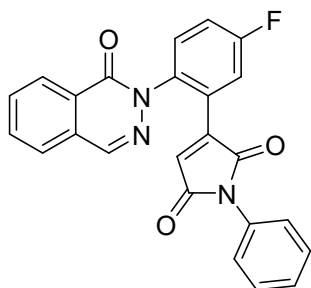

Purified by column chromatography on silica gel using hexane/ethylacetate (70/30)

**Yield:** 45% from Condition A, Off-white coloured solid

**<sup>1</sup>H NMR (400 MHz, CDCl<sub>3</sub>) δ:** 8.40 (d, *J* = 7.84 Hz, 1H), 8.23 (s, 1H), 7.84 (dt, *J* = 7.46 Hz 1H), 7.78 (dt, *J* = 7.6 Hz 1H), 7.73 (d, *J* = 7.84 Hz, 1H), 7.59–7.56 (m, 1H), 7.50–7.7.47 (m, 1H), 7.36–7.32 (m, 2H), 7.28–7.24 (m, 2H), 7.19–7.16 (m, 2H), 6.38 (s, 1H).

**<sup>13</sup>C NMR (100 MHz, CDCl<sub>3</sub>) δ:** 168.7, 168.2, 159.4, 141.3, 139.2, 134.1, 132.6, 131.2, 130.7, 130.6, 129.6, 129.0, 128.0, 127.9, 127.8, 127.3, 126.6, 126.0, 118.4, 118.2, 118.1, 117.9.

**<sup>19</sup>F NMR (376 MHz, CDCl<sub>3</sub>) δ:** -111.06

**HRMS (ESI) m/z:** [M+H]<sup>+</sup> Calculated for C<sub>24</sub>H<sub>15</sub>FN<sub>3</sub>O<sub>3</sub>, 412.1092; Found 412.1098.

### 3-(2-(1-oxophthalazin-2(1H)-yl)-5-(trifluoromethyl)phenyl)-1-phenyl-1H-pyrrole-2,5-dione(3d)

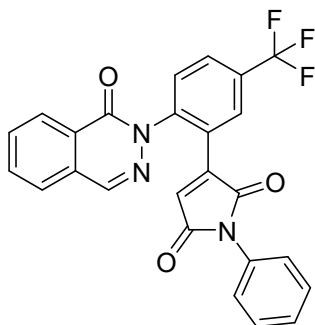

Purified by column chromatography on silica gel using hexane/ethylacetate (70/30)

**Yield:** 34% from Condition A, Off-white coloured solid

**<sup>1</sup>H NMR (400 MHz, CDCl<sub>3</sub>) δ:** 8.50 (d, *J* = 7.8 Hz, 1H), 8.34 (s, 1H), 8.12 (s, 1H), 7.96–7.86 (m, 3H), 7.80 (t, *J* = 8.44 Hz, 2H), 7.42 (t, *J* = 7.18 Hz, 2H), 7.36–7.32 (m, 1H), 7.25 (d, *J* = 7.36 Hz, 2H), 6.59 (s, 1H).

**<sup>13</sup>C NMR (100 MHz, CDCl<sub>3</sub>) δ:** 168.6, 168.0, 159.2, 143.5, 142.0, 139.4, 134.3, 132.7, 131.1, 129.5, 129.4, 129.0, 128.1, 127.9, 127.4, 126.9, 126.6, 125.9, 121.9.

**<sup>19</sup>F NMR (376 MHz, CDCl<sub>3</sub>) δ:** -62.53

**HRMS (ESI) m/z:** [M+Na]<sup>+</sup> Calculated for C<sub>25</sub>H<sub>14</sub>F<sub>3</sub>N<sub>3</sub>O<sub>3</sub>Na, 484.0879; Found 484.0895.

### 3-(2-bromo-6-(1-oxophthalazin-2(1H)-yl)phenyl)-1-phenyl-1H-pyrrole-2,5-dione (3e)

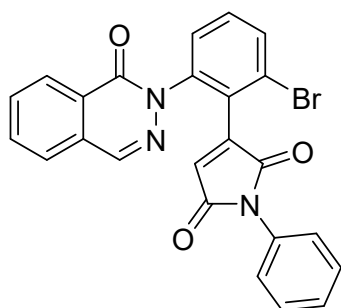

Purified by column chromatography on silica gel using hexane/ethylacetate (70/30)

**Yield:** 58% from Condition A, Off-white coloured solid

**<sup>1</sup>H NMR (400 MHz, CDCl<sub>3</sub>) δ:** 8.39 (d, *J* = 7.8 Hz, 1H), 8.23 (s, 1H), 7.83 (t, *J* = 7.26 Hz, 1H), 7.77 (t, *J* = 7.28 Hz, 1H), 7.72–7.68 (m, 3H), 7.65–7.62 (m, 1H), 7.32 (t, *J* = 7.6 Hz, 2H), 7.24 (t, *J* = 7.36 Hz, 1H), 7.16 (d, *J* = 7.6 Hz, 2H), 6.38 (s, 1H).

**<sup>13</sup>C NMR (100 MHz, CDCl<sub>3</sub>) δ:** 168.8, 168.3, 159.2, 141.8, 141.6, 139.3, 134.2, 132.6, 132.1, 132.1, 132.0, 131.3, 129.5, 129.0, 128.0, 127.9, 127.3, 127.2, 126.6, 126.0, 125.2, 125.1.

**HRMS (ESI) m/z:** [M+H]<sup>+</sup> Calculated for C<sub>24</sub>H<sub>15</sub>BrN<sub>3</sub>O<sub>3</sub>, 472.0291; Found 472.0279.

**1-(4-methylbenzyl)-3-(2-(1-oxophthalazin-2(1H)-yl)phenyl)-1H-pyrrole-2,5-dione (3f)**

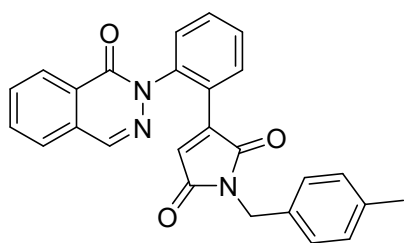

Purified by column chromatography on silica gel using hexane/ethylacetate (70/30)

**Yield:** 56% from Condition A, Off-white coloured solid

**<sup>1</sup>H NMR (400 MHz, CDCl<sub>3</sub>) δ:** 8.35 (d, *J* = 7.8 Hz, 1H), 8.06 (s, 1H), 7.79 (t, *J* = 7.06 Hz, 1H), 7.73 (t, *J* = 7.28 Hz, 1H), 7.67 (d, *J* = 7.64 Hz, 1H), 7.62 (d, *J* = 7.68 Hz, 1H), 7.54–7.48 (m, 2H), 7.46–7.42 (m, 1H), 7.03 (d, *J* = 7.96 Hz, 2H), 6.95 (d, *J* = 7.92 Hz, 2H), 6.28 (s, 1H), 4.46 (s, 2H), 2.23 (s, 3H).

**<sup>13</sup>C NMR (100 MHz, CDCl<sub>3</sub>) δ:** 169.9, 169.3, 159.3, 143.5, 140.5, 138.7, 137.3, 133.7, 133.2, 132.3, 131.2, 130.9, 129.5, 129.2, 128.7, 128.6, 128.3, 128.1, 127.3, 127.1, 126.4, 126.3, 41.1, 29.1.

**HRMS (ESI) m/z:** [M+H]<sup>+</sup> Calculated for C<sub>26</sub>H<sub>20</sub>N<sub>3</sub>O<sub>3</sub>, 422.1499; Found 422.1491.

**1-(naphthalen-1-yl)-3-(2-(1-oxophthalazin-2(1H)-yl)phenyl)-1H-pyrrole-2,5-dione (3g)**

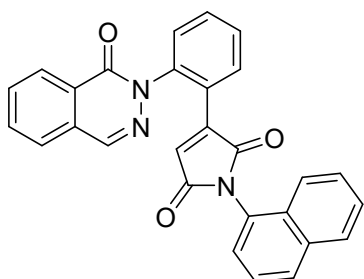

Purified by column chromatography on silica gel using hexane/ethylacetate (70/30)

**Yield:** 32% from Condition A, Off-white coloured solid

**<sup>1</sup>H NMR (400 MHz, CDCl<sub>3</sub>) δ:** 8.44 (d, *J* = 7.2 Hz, 1H), 8.26 (s, 1H), 7.83–7.74 (m, 5H), 7.69 (dd, *J* = 7.84 Hz, 1H), 7.61–7.54 (m, 2H), 7.51 (dt, *J* = 7.28 Hz, 1H), 7.43–7.38 (m, 3H), 7.30 (dt, *J* = 7.64 Hz, 1H), 7.22 (d, *J* = 7.24 Hz, 1H), 6.56 (s, 1H).

**<sup>13</sup>C NMR (100 MHz, CDCl<sub>3</sub>) δ:** 169.6, 168.9, 159.3, 144.1, 140.6, 139.0, 134., 133.9, 132.4, 131.5, 130.8, 130.3, 129.8, 129.6, 128.8, 128.6, 128.4, 128.1, 127.8, 127.2, 127.2, 126.9, 126.9, 126.5, 126.4, 126.2, 125.3, 122.2.

**HRMS (ESI) m/z:** [M+H]<sup>+</sup> Calculated for C<sub>28</sub>H<sub>18</sub>N<sub>3</sub>O<sub>3</sub>, 444.1343; Found 444.1343.

**Ethyl 4-(2,5-dioxo-3-(2-(1-oxophthalazin-2(1H)-yl)phenyl)-2,5-dihydro-1H-pyrrol-1-yl)benzoate (3h)**

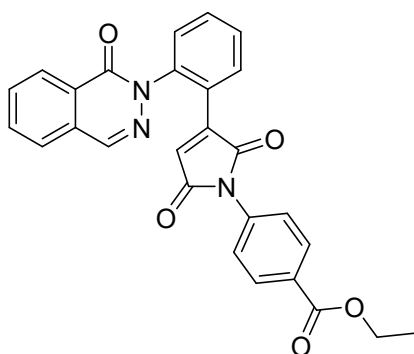

Purified by column chromatography on silica gel using hexane/ethylacetate (70/30)

**Yield:** 36% from Condition A, Off-white coloured solid

**<sup>1</sup>H NMR (400 MHz, CDCl<sub>3</sub>) δ:** 8.39 (d, *J* = 7.24 Hz, 1H), 8.23 (s, 1H), 7.99 (d, *J* = 7.92 Hz, 2H), 7.82 (d, *J* = 6.96 Hz, 1H), 7.78 (d, *J* = 6.88 Hz, 2H), 7.71 (d, *J* = 7.24 Hz, 1H), 7.58 (d, *J* = 6.84 Hz, 1H), 7.54–7.50 (m, 2H), 7.30 (d, *J* = 8.04 Hz, 2H), 6.42 (s, 1H), 4.30 (q, *J* = 6.92 Hz, 2H), 1.30 (t, *J* = 6.48 Hz, 3H).

**<sup>13</sup>C NMR (100 MHz, CDCl<sub>3</sub>) δ:** 168.5, 168.0, 165.8, 159.3, 143.2, 140.7, 139.0, 135.4, 134.0, 132.5, 131.6, 130.9, 130.3, 129.6, 129.3, 128.9, 128.8, 128.1, 127.3, 127.2, 126.5, 125.9, 125.1, 61.1, 14.3.

**HRMS (ESI) m/z:** [M+Na]<sup>+</sup> Calculated for C<sub>27</sub>H<sub>19</sub>N<sub>3</sub>O<sub>5</sub>Na, 488.1217; Found 488.1241.

**3-(2-(1-oxophthalazin-2(1H)-yl) phenyl)-1-phenyl-1H-pyrrole-2,5-dione (3i)**

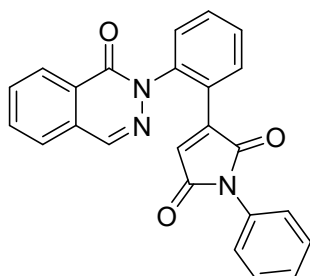

Purified by column chromatography on silica gel using hexane/ethylacetate (70/30)

**Yield:** 15% from Condition B, Off-white coloured solid

**<sup>1</sup>H NMR (400 MHz, CDCl<sub>3</sub>) δ:** 8.39 (d, *J* = 7.8 Hz, 1H), 8.23 (s, 1H), 7.83–7.73 (m, 3H), 7.71 (d, *J* = 7.8 Hz, 1H), 7.59–7.55 (m, 1H), 7.52–7.47 (m, 2H), 7.33–7.29 (m, 2H), 7.25 (d, *J* = 7.64 Hz, 1H), 7.16 (d, *J* = 7.48 Hz, 2H), 6.39 (s, 1H).

**<sup>13</sup>C NMR (100 MHz, CDCl<sub>3</sub>) δ:** 169.1, 168.5, 159.4, 142.9, 140.8, 138.9, 133.9, 132.7, 131.4, 131.4, 131.0, 129.6, 129.0, 128.9, 128.8, 128.1, 127.8, 127.3, 127.1, 126.5, 126.1, 126.0.

**HRMS (ESI) m/z:** [M+H]<sup>+</sup> Calculated for C<sub>24</sub>H<sub>16</sub>N<sub>3</sub>O<sub>3</sub>, 394.1186; Found 394.1189.

**1-(4-methoxyphenyl)-3-(2-(1-oxophthalazin-2(1H)-yl)phenyl)-1H-pyrrole-2,5-dione (3k)**

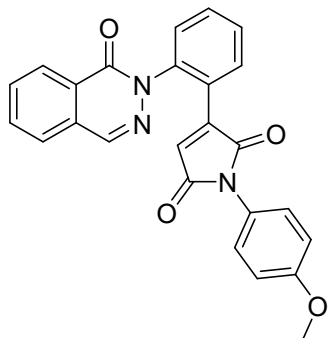

Purified by column chromatography on silica gel using hexane/ethylacetate (70/30)

**Yield:** 4% from condition B, sticky white oil

**<sup>1</sup>H NMR (400 MHz, CDCl<sub>3</sub>) δ:** 8.41 (d, *J* = 7.52 Hz, 1H), 8.22 (s, 1H), 7.82–7.73 (m, 3H), 7.70 (d, *J* = 7.36 Hz, 1H), 7.56–7.47 (m, 3H), 7.27 (t, *J* = 7.74 Hz, 1H), 7.00 (d, *J* = 7.48 Hz, 1H), 6.90–6.85 (m, 2H), 6.41 (s, 1H), 3.62 (s, 3H).

**<sup>13</sup>C NMR (100 MHz, CDCl<sub>3</sub>) δ:** 169.3, 168.6, 159.3, 155.3, 143.2, 140.7, 138.8, 133.8, 132.3, 131.3, 131.1, 130.5, 130.0, 129.7, 128.8, 128.7, 128.2, 127.5, 127.3, 126.4, 120.7, 112.0, 55.7.

**HRMS (ESI) m/z:** [M+Na]<sup>+</sup> Calculated for C<sub>25</sub>H<sub>17</sub>N<sub>3</sub>O<sub>4</sub>Na, 446.1111; Found 446.1136.

**1-(4-(diethylamino)phenyl)-3-(2-(1-oxophthalazin-2(1H)-yl)phenyl)-1H-pyrrole-2,5-dione (3l)**

Purified by column chromatography on silica gel using hexane/ethylacetate (70/30)

**Yield:** 6% from condition B, sticky pale yellow oil

**<sup>1</sup>H NMR (400 MHz, CDCl<sub>3</sub>) δ:** 8.39 (d, *J* = 7.2 Hz, 1H), 8.22 (s, 1H), 7.82–7.75 (m, 4H), 7.70 (d, *J* = 6.84 Hz, 1H), 7.55–7.48 (m, 3H), 6.92 (d, *J* = 7.92 Hz, 2H), 6.55 (d, *J* = 7.8 Hz, 2H), 6.34 (s, 1H), 3.26–3.24 (m, 4H), 1.06 (m, 6H).

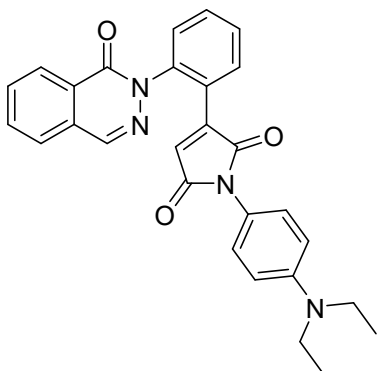

**<sup>13</sup>C NMR (100 MHz, CDCl<sub>3</sub>) δ:** 170.0, 169.3, 159.4, 147.4, 142.4, 140.7, 139.9, 133.9, 132.4, 131.2, 131.1, 129.6, 128.9, 128.7, 128.1, 127.5, 127.3, 127.1, 126.5, 126.4, 118.5, 111.5, 44.43, 12.5.

**HRMS (ESI) m/z:** [M+H]<sup>+</sup> Calculated for C<sub>28</sub>H<sub>25</sub>N<sub>4</sub>O<sub>3</sub>, 465.1921; Found 465.1943.

**1-(3-chlorophenyl)-3-(2-(1-oxophthalazin-2(1H)-yl)phenyl)-1H-pyrrole-2,5-dione (3m)**

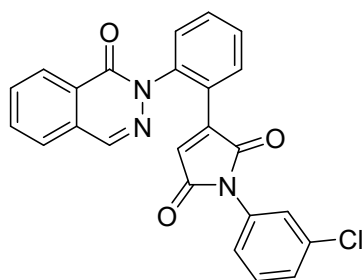

Purified by column chromatography on silica gel using hexane/ethylacetate (70/30)

**Yield:** 5% from condition B, Off-white coloured solid

**<sup>1</sup>H NMR (400 MHz, CDCl<sub>3</sub>) δ:** 8.40 (d, *J* = 7.48 Hz, 1H), 8.24 (s, 1H), 7.83–7.75 (m, 3H), 7.73 (d, *J* = 7.26 Hz, 1H), 7.59 (d, *J* = 7.24 Hz, 1H), 7.54–7.49 (m, 2H), 7.25–7.22 (m, 2H), 7.15 (s, 1H), 7.11 (d, *J* = 7.44 Hz, 1H), 6.41 (s, 1H).

**<sup>13</sup>C NMR (100 MHz, CDCl<sub>3</sub>) δ:** 167.5, 167.0, 158.3, 142.2, 139.7, 137.9, 133.4, 133.0, 131.5, 131.4, 130.6, 129.9, 128.8, 128.5, 127.8, 127.7, 127.0, 126.8, 126.2, 126.0, 125.5, 125.0, 124.8, 122.9.

**HRMS (ESI) m/z:** [M+H]<sup>+</sup> Calculated for C<sub>24</sub>H<sub>14</sub>ClN<sub>3</sub>O<sub>3</sub>Na, 450.0616; Found 450.0634.

**1-(2-nitrophenyl)-3-(2-(1-oxophthalazin-2(1H)-yl)phenyl)pyrrolidine-2,5-dione (3n)**

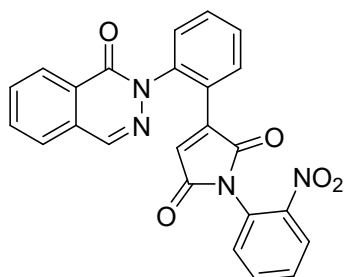

Purified by column chromatography on silica gel using hexane/ethylacetate (70/30)

**Yield:** 5% from condition B, pale yellow coloured solid

**<sup>1</sup>H NMR (400 MHz, CDCl<sub>3</sub>) δ:** 8.42 (d, *J* = 7.4 Hz, 1H), 8.26 (s, 1H), 8.01 (d, *J* = 8.16 Hz, 1H), 7.80–7.75 (m, 2H), 7.71 (d, *J* = 7.48 Hz, 2H), 7.60–7.57 (m, 3H), 7.49–7.44 (m, 1H), 7.26 (d, *J* = 7.4 Hz, 1H), 6.60 (s, 1H), 6.53 (s, 1H).

**<sup>13</sup>C NMR (100 MHz, CDCl<sub>3</sub>) δ:** 168.0, 167.5, 159.5, 145.4, 144.8, 140.6, 139.2, 134.0, 133.8, 132.3, 131.5, 131.0, 130.9, 129.6, 129.6, 128.8, 128.7, 127.8, 128.7, 128.1, 127.8, 127.3, 126.6, 125.8, 125.7, 116.1.

**HRMS (ESI) m/z:** [M+H]<sup>+</sup> Calculated for C<sub>24</sub>H<sub>15</sub>N<sub>4</sub>O<sub>5</sub>, 439.1037; Found 439.1039.

**Methyl 4-(2,5-dioxo-3-(2-(1-oxophthalazin-2(1H)-yl)phenyl)-2,5-dihydro-1H-pyrrol-1-yl)thiophene-3-carboxylate (3o)**

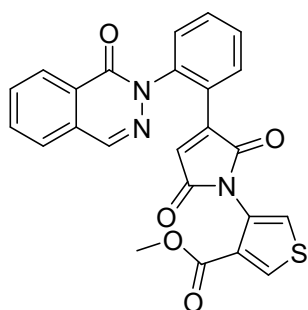

Purified by column chromatography on silica gel using hexane/ethylacetate (70/30)

**Yield:** 5% from condition B, pale yellow coloured solid

**<sup>1</sup>H NMR (400 MHz, CDCl<sub>3</sub>) δ:** 8.40 (d, *J* = 7.56 Hz, 1H), 8.24 (s, 1H), 7.80–7.74 (m, 3H), 7.70 (d, *J* = 7.44 Hz, 1H), 7.56–7.50 (m, 4H), 6.87 (d, *J* = 3.08 Hz, 1H), 6.42 (s, 1H), 3.66 (s, 3H).

**<sup>13</sup>C NMR (100 MHz, CDCl<sub>3</sub>) δ:** 168.2, 167.7, 160.6, 159.3, 143.7, 140.7, 139.0, 133.9, 133.0, 132.3, 131.4, 131.1, 130.2, 129.7, 128.8, 128.7, 128.2, 128.0, 127.6, 127.3, 127.2, 126.5, 126.2, 52.1.

**HRMS (ESI) m/z:** [M+H]<sup>+</sup> Calculated for C<sub>24</sub>H<sub>16</sub>N<sub>3</sub>O<sub>5</sub>S, 458.0805; Found 458.0795.

### 3-(2-(1-oxophthalazin-2(1H)-yl)phenyl)-1-phenylpyrrolidine-2,5-dione (4a)

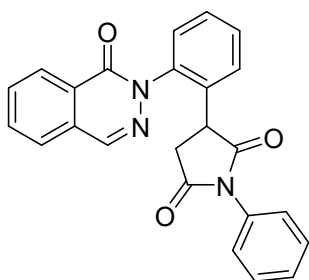

Purified by column chromatography on silica gel using hexane/ethylacetate (65/35)

**Yield:** 45% from condition B, 60% from condition C, Off-white coloured solid

**<sup>1</sup>H NMR (400 MHz, CDCl<sub>3</sub>) δ:** 8.44 (d, *J* = 7.76 Hz, 1H), 8.23 (s, 1H), 7.83 (dt, *J* = 7.36 Hz, 1H), 7.78 (dt, *J* = 7.58 Hz, 1H), 7.71 (d, *J* = 7.84 Hz, 1H), 7.45–7.43 (m, 2H), 7.39–7.32 (m, 4H), 7.30 (d, *J* = 7.16 Hz, 1H), 7.15 (d, *J* = 7.32 Hz, 2H), 4.23–4.19 (m, 1H), 3.20–3.13 (m, 1H), 2.99–2.93 (m, 1H).

**<sup>13</sup>C NMR (100 MHz, CDCl<sub>3</sub>) δ:** 176.1, 175.1, 159.5, 140.9, 138.9, 134.9, 133.9, 132.4, 131.8, 131.2, 129.8, 129.6, 129.1, 129.0, 128.9, 128.5, 128.1, 127.3, 126.4, 126.2, 42.4, 37.3.

**HRMS (ESI) m/z:** [M+Na]<sup>+</sup> Calculated for C<sub>24</sub>H<sub>17</sub>N<sub>3</sub>O<sub>3</sub>Na, 418.1162; Found 418.1190.

### 1-(2-methoxyphenyl)-3-(2-(1-oxophthalazin-2(1H)-yl)phenyl)pyrrolidine-2,5-dione (4b)

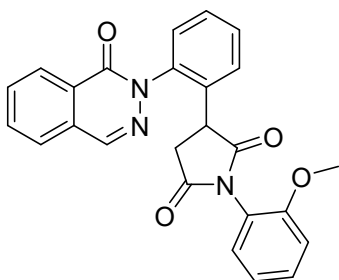

Purified by column chromatography on silica gel using hexane/ethylacetate (65/35)

**Yield:** 20% from condition B, 50% from condition C, Off-white coloured solid

**<sup>1</sup>H NMR (400 MHz, CDCl<sub>3</sub>) δ:** 8.45 (d, *J* = 9.24 Hz, 2.41H), 8.26 (s, 1.27H), 8.25 (s, 0.98H), 7.86–7.77 (m, 4.78H), 7.73 (d, *J* = 7.68 Hz, 2.40H), 7.51–7.27 (m, 11.81H), 7.02–6.88 (m, 7.08H), 4.26–4.22 (m, 1H), 4.15–4.12 (m, 1.53H), 3.80 (s, 4.52H), 3.65 (s, 3H), 3.21–3.19 (m, 1H), 3.16–3.13 (m, 1.52H), 2.95–2.91 (m, 1H), 2.91–2.86 (m, 1.56H).

**<sup>13</sup>C NMR (100 MHz, CDCl<sub>3</sub>) δ:** 176.3 (C), 175.8 (C\*), 175.3 (C), 175.0 (C\*), 159.5 (CC\*), 154.6 (CC\*), 141.0 (C), 140.9 (C\*), 138.8 (C), 138.8 (C\*), 136.1 (C), 135.2 (C\*), 133.9 (CC\*), 132.3 (C), 132.3 (C\*), 130.8 (C), 130.7 (C\*), 129.8 (C), 129.8 (C\*), 129.7 (CC\*), 129.1 (CC\*), 128.9 (C), 128.8 (C\*), 128.3 (CC\*), 128.2 (C), 128.1 (C\*), 127.9 (C), 127.4 (C\*), 127.3 (C),

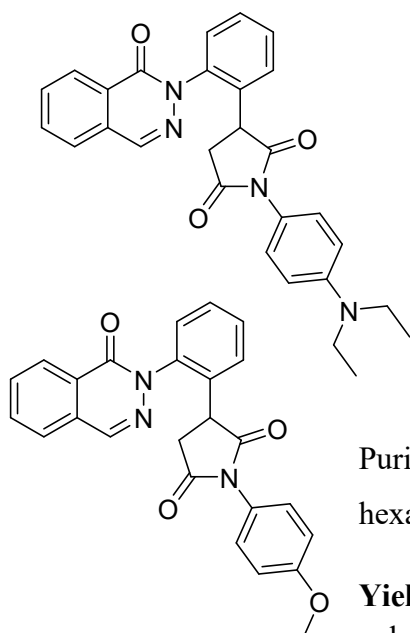

127.2 (C\*), 126.4 (C), 126.4 (C\*), 121.0 (C), 120.9 (C\*), 120.8 (C), 120.7 (C\*), 112.1 (C), 112.1 (C\*), 55.9 (C), 55.7 (C\*), 42.5 (C), 42.0 (C\*), 38.2 (C), 37.6 (C\*).

**HRMS (ESI) m/z:** [M+H]<sup>+</sup> Calculated for C<sub>25</sub>H<sub>20</sub>N<sub>3</sub>O<sub>4</sub>, 426.1448; Found 426.1458.

**1-(4-methoxyphenyl)-3-(2-(1-oxophthalazin-2(1H)-yl)phenyl)pyrrolidine-2,5-dione (4c)**

Purified by column chromatography on silica gel using hexane/ethylacetate (65/35)

**Yield:** 40% from condition B, 57% from condition C, Off-white coloured solid

**<sup>1</sup>H NMR (400 MHz, CDCl<sub>3</sub>) δ:** 8.43 (d, *J* = 7.72 Hz, 1H), 8.22 (s, 1H), 7.84–7.75 (m, 2H), 7.71 (d, *J* = 8.28 Hz, 1H), 7.45–7.40 (m, 2H), 7.39–7.34 (m, 2H), 7.06 (d, *J* = 8.96, 2H), 6.85 (d, *J* = 8.96, 2H), 4.20–4.17 (m, 1H), 3.73 (s, 3H), 3.17–3.10 (m, 1H), 2.96–2.90 (m, 1H).

**<sup>13</sup>C NMR (100 MHz, CDCl<sub>3</sub>) δ:** 176.2, 175.3, 159.5, 159.4, 140.9, 138.9, 135.0, 133.9, 132.3, 129.8, 129.6, 129.0, 128.8, 128.1, 128.1, 127.4, 127.3, 126.4, 124.5, 114.4, 55.4, 42.4, 37.2.

**HRMS (ESI) m/z:** [M+Na]<sup>+</sup> Calculated for C<sub>25</sub>H<sub>19</sub>N<sub>3</sub>O<sub>4</sub>Na, 448.1268; Found 448.1289.

**1-(4-(diethylamino)phenyl)-3-(2-(1-oxophthalazin-2(1H)-yl)phenyl)pyrrolidine-2,5-dione (4d)**

Purified by column chromatography on silica gel using hexane/ethylacetate (70/30)

**Yield:** 35% from condition B, 54% from condition C, Off-white coloured solid

**<sup>1</sup>H NMR (400 MHz, CDCl<sub>3</sub>) δ:** 8.52 (d, *J* = 7.76 Hz, 1H), 8.32 (s, 1H), 7.91–7.86 (m, 2H), 7.80 (d, *J* = 7.2 Hz, 1H), 7.51–7.46 (m, 4H), 7.03 (d, *J* = 8.52 Hz, 2H), 6.66 (d, *J* = 8.24 Hz, 2H), 4.27–4.24 (m, 1H), 3.36–3.34 (m, 4H), 3.23–3.16 (m, 1H), 3.00–2.95 (m, 1H), 1.16 (s, 6H).

**<sup>13</sup>C NMR (100 MHz, CDCl<sub>3</sub>) δ:** 176.6, 175.8, 159.5, 147.7, 140.9, 138.9, 135.3, 133.9, 132.3, 129.8, 129.6, 128.9, 128.7, 128.1, 128.0, 127.3, 127.1, 126.4, 119.0, 111.4, 44.4, 42.2, 37.3, 12.5.

**HRMS (ESI) m/z:** [M+Na]<sup>+</sup> Calculated for C<sub>28</sub>H<sub>26</sub>N<sub>4</sub>O<sub>3</sub>Na, 489.1897; Found 489.1908.

### 1-(3-chlorophenyl)-3-(2-(1-oxophthalazin-2(1H)-yl)phenyl)pyrrolidine-2,5-dione (4e)

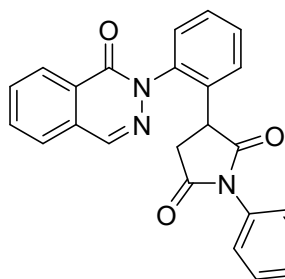

Purified by column chromatography on silica gel using hexane/ethylacetate (65/35)

**Yield:** 23% from condition B, 58% from condition C, Off-white coloured solid

**<sup>1</sup>H NMR (400 MHz, CDCl<sub>3</sub>) δ:** 8.43 (d, *J* = 7.64 Hz, 1H), 8.22 (s, 1H), 7.85–7.76 (m, 2H), 7.71 (d, *J* = 7.36 Hz, 1H), 7.44–7.35 (m, 4H), 7.25 (s, 2H), 7.12–7.06 (m, 2H), 4.21 (m, 1H), 3.21–3.14 (m, 1H), 3.03–2.98 (m, 1H).

**<sup>13</sup>C NMR (100 MHz, CDCl<sub>3</sub>) δ:** 175.5, 174.6, 159.5, 140.8, 139.0, 134.5, 134.0, 132.8, 132.4, 129.9, 129.8, 129.6, 128.7, 128.4, 128.0, 127.3, 127.3, 126.4, 124.3.

**HRMS (ESI) m/z:** [M+Na]<sup>+</sup> Calculated for C<sub>24</sub>H<sub>16</sub>ClN<sub>3</sub>O<sub>3</sub>Na, 452.0772; Found 452.0794.

### 1-(2-nitrophenyl)-3-(2-(1-oxophthalazin-2(1H)-yl)phenyl)-1H-pyrrole-2,5-dione (4f)

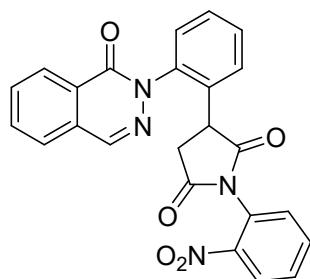

Purified by column chromatography on silica gel using hexane/ethylacetate (65/35)

**Yield:** 76% from condition B, 54% from condition C, Off-white coloured solid

**<sup>1</sup>H NMR (400 MHz, CDCl<sub>3</sub>) δ:** 8.44 (d, *J* = 7.44 Hz, 2.34H), 8.25 (s, 2.36H), 8.13–8.06 (m, 2.78H), 7.84–7.78 (m, 5.29H), 7.73 (d, *J* = 7.28 Hz, 3H), 7.64 (d, *J* = 6.84 Hz, 3.18H), 7.54–7.49 (m, 6.35H), 7.43–7.35 (m, 7.50H), 7.23–7.21 (m, 2.84H), 4.28 (m, 1H), 4.20 (m, 1.28H), 3.28–3.20 (m, 2.22H), 3.02–2.97 (m, 2.30H).

**<sup>13</sup>C NMR (100 MHz, CDCl<sub>3</sub>) δ:** 174.2 (C), 174.2 (C\*), 159.5 (CC\*), 139.1 (C), 139.0 (C\*), 134.3 (CC\*), 133.9 (CC\*), 133.1 (CC\*), 132.4 (C), 132.4 (C\*), 132.3 (CC\*), 130.4 (CC\*), 130.3 (CC\*), 130.1 (CC\*), 129.8 (C), 129.6 (C\*), 129.2 (C), 129.1 (C\*), 129.0 (CC\*), 128.1 (C), 128.1 (C\*), 128.0 (C), 127.5 (C\*), 127.3 (CC\*), 126.8 (C), 126.5 (C\*), 126.4 (CC\*), 126.1 (C), 126.0 (C\*), 125.9 (CC\*), 42.9 (C), 42.1 (C\*), 38.4 (C), 37.5 (C\*).

**HRMS (ESI) m/z:** [M+Na]<sup>+</sup> Calculated for C<sub>24</sub>H<sub>16</sub>N<sub>4</sub>O<sub>5</sub>Na, 463.1013; Found 463.1033.

### Methyl 4-(2,5-dioxo-3-(2-(1-oxophthalazin-2(1H)-yl)phenyl)pyrrolidin-1-yl)thiophene-3-carboxylate (4g)

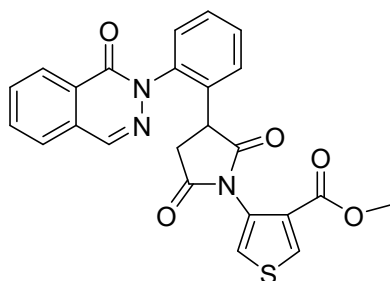

Purified by column chromatography on silica gel using hexane/ethylacetate (65/35)

**Yield:** 34% from condition B, 53% from condition C, Off-white coloured solid

**<sup>1</sup>H NMR (400 MHz, CDCl<sub>3</sub>) δ:** 8.43 (d, *J* = 7.76 Hz, 1H), 8.24 (s, 1H), 7.83 (dt, *J* = 7.12 Hz, 1H), 7.78 (dt, *J* = 7.58 Hz, 1H), 7.73 (d, *J* = 7.84 Hz, 1H), 7.52 (d, *J* = 7.4 Hz, 1H), 7.47–7.40 (m, 3H), 7.37–7.35 (m, 1H), 6.84 (d, *J* = 5.28 Hz, 1H), 4.22–4.18 (m, 1H), 3.73 (s, 3H), 3.23–3.19 (m, 1H), 2.99–2.93 (m, 1H).

**<sup>13</sup>C NMR (100 MHz, CDCl<sub>3</sub>) δ:** 175.5, 174.3, 160.5, 159.5, 141.0, 138.9, 135.1, 134.1, 133.9, 132.3, 130.4, 129.9, 129.6, 129.0, 128.4, 128.2, 128.1, 127.4, 127.3, 126.4, 52.2, 42.4, 38.0.

**HRMS (ESI) m/z:** [M+Na]<sup>+</sup> Calculated for C<sub>24</sub>H<sub>17</sub>N<sub>3</sub>O<sub>5</sub>Na, 482.0781; Found 482.0802.

**1-(4-hydroxyphenyl)-3-(2-(1-oxophthalazin-2(1H)-yl)phenyl)pyrrolidine-2,5-dione (4h)**

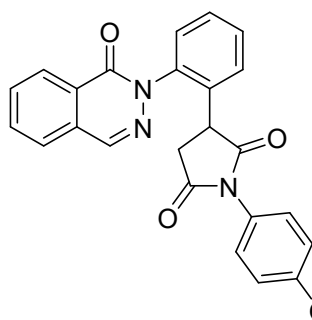

Purified by column chromatography on silica gel using hexane/ethylacetate (65/35)

**Yield:** 56% from condition C, Off-white coloured solid

**<sup>1</sup>H NMR (400 MHz, CDCl<sub>3</sub>) δ:** 8.41 (d, *J* = 7.72 Hz, 1H), 8.23 (s, 1H), 7.83–7.74 (m, 2H), 7.70 (d, *J* = 7.44 Hz, 1H), 7.41–7.32 (m, 4H), 6.86 (d, *J* = 7.68 Hz, 2H), 6.64 (d, *J* = 7.6 Hz, 2H), 4.18–4.14 (m, 1H), 3.15–3.08 (m, 1H), 2.94–2.88 (m, 1H).

**<sup>13</sup>C NMR (100 MHz, CDCl<sub>3</sub>) δ:** 176.6, 175.5, 159.7, 156.2, 140.8, 139.1, 134.8, 134.1, 132.5, 129.9, 129.6, 129.1, 128.8, 128.2, 128.0, 127.5, 127.2, 126.5, 123.8, 116.0, 42.3, 37.2.

**HRMS (ESI) m/z:** [M+Na]<sup>+</sup> Calculated for C<sub>24</sub>H<sub>17</sub>N<sub>3</sub>O<sub>4</sub>Na, 434.1111; Found 434.1133.

**Ethyl 4-(2,5-dioxo-3-(2-(1-oxophthalazin-2(1H)-yl)phenyl)pyrrolidin-1-yl)benzoate (4i)**

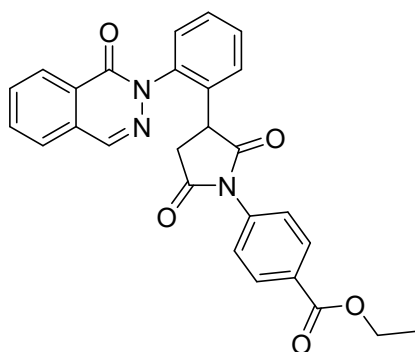

Purified by column chromatography on silica gel using hexane/ethylacetate (65/3)

**Yield:** 58% from condition C, Off-white coloured solid

**<sup>1</sup>H NMR (400 MHz, CDCl<sub>3</sub>) δ:** 8.42 (d, *J* = 7.68 Hz, 1H), 8.21 (s, 1H), 8.00 (d, *J* = 7.44 Hz, 2H), 7.84–7.77 (m, 2H), 7.69 (d, *J* = 7.6 Hz, 1H), 7.45–7.42 (m, 2H), 7.39–7.34 (m, 2H), 7.25 (d, *J* = 8.0 Hz, 2H), 4.31 (q, *J* = 7.09 Hz, 2H), 4.23–4.20 (m, 1H), 3.22–3.15 (m, 1H), 3.03–2.96 (m, 1H), 1.31 (t, *J* = 7.14 Hz, 3H).

**<sup>13</sup>C NMR (100 MHz, CDCl<sub>3</sub>) δ:** 175.5, 174.5, 165.6, 159.5, 140.9, 138.9, 135.6, 134.6, 134.0, 132.4, 130.2, 129.8, 129.6, 129.2, 129.0, 128.4, 128.0, 127.3, 126.4, 125.8, 125.1, 61.2, 42.6, 37.2, 14.3.

**HRMS (ESI) m/z:**  $[M+Na]^+$  Calculated for  $C_{27}H_{21}N_3O_5Na$ , 490.1373; Found 490.1396.

**3-(5-methoxy-2-(1-oxophthalazin-2(1H)-yl)phenyl)-1-phenylpyrrolidine-2,5-dione (4j)**

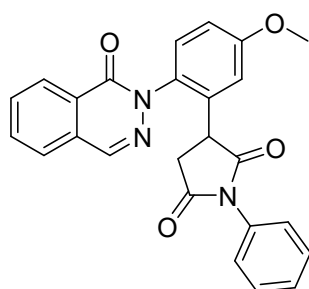

Purified by column chromatography on silica gel using hexane/ethylacetate (65/35)

**Yield:** 51% from condition B, 56% from condition C, Off-white coloured solid

**$^1H$  NMR (400 MHz,  $CDCl_3$ )  $\delta$ :** 8.41 (d,  $J = 7.72$  Hz, 1H), 8.19 (s, 1H), 7.82–7.73 (m, 2H), 7.68 (dd,  $J = 7.8$  Hz, 1H), 7.35–7.25 (m, 4H), 7.13–7.11 (m, 2H), 6.93 (dd,  $J = 8.76$  Hz, 1H), 6.86 (d,  $J = 2.76$  Hz, 1H), 4.17–4.13 (m, 1H), 3.78 (s, 3H), 3.15–3.07 (m, 1H), 2.98–2.92 (m, 1H).

**$^{13}C$  NMR (100 MHz,  $CDCl_3$ )  $\delta$ :** 175.7, 174.9, 160.1, 159.7, 138.8, 136.0, 133.8, 133.7, 132.3, 131.8, 129.9, 129.6, 129.0, 128.5, 128.1, 127.3, 126.4, 126.2, 114.0, 113.7, 55.6, 42.5, 37.2.

**HRMS (ESI) m/z:**  $[M+Na]^+$  Calculated for  $C_{25}H_{19}N_3O_4Na$ , 448.1268; Found 448.1293.

**3-(5-fluoro-2-(1-oxophthalazin-2(1H)-yl)phenyl)-1-phenylpyrrolidine-2,5-dione (4k)**

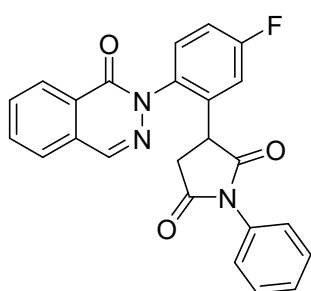

Purified by column chromatography on silica gel using hexane/ethylacetate (65/35)

**Yield:** 43% from condition B, 52% from condition C, Off-white coloured solid

**$^1H$  NMR (400 MHz,  $CDCl_3$ )  $\delta$ :** 8.43 (d,  $J = 7.76$  Hz, 1H), 8.23 (s, 1H), 7.86–7.77 (m, 2H), 7.71 (d,  $J = 7.4$  Hz, 1H), 7.39–7.33 (m, 3H), 7.31 (d,  $J = 7.2$  Hz, 1H), 7.15–7.08 (m, 4H), 4.23–4.19 (m, 1H), 3.17–3.10 (m, 1H), 2.96–2.90 (m, 1H).

**$^{13}C$  NMR (100 MHz,  $CDCl_3$ )  $\delta$ :** 175.3, 174.5, 163.8 (d,  $J = 248$  Hz), 159.6, 139.1, 137.1 (d,  $J = 8$  Hz), 137.0, 136.9, 134.1, 132.5, 131.6, 130.8 (d,  $J = 9.1$  Hz), 129.6, 129.1, 128.6, 128.0, 127.3 (d,  $J = 81$  Hz), 126.2, 116.2 (d,  $J = 22.53$  Hz), 115.3 (d,  $J = 24$  Hz), 42.4, 36.9.

**<sup>19</sup>F NMR (376 MHz, CDCl<sub>3</sub>) δ:** -110.41

**HRMS (ESI) m/z:** [M+Na]<sup>+</sup> Calculated for C<sub>24</sub>H<sub>16</sub>FN<sub>3</sub>O<sub>3</sub>Na, 436.1068; Found 436.1098.

**3-(2-bromo-6-(1-oxophthalazin-2(1H)-yl)phenyl)-1-phenylpyrrolidine-2,5-dione (4l)**

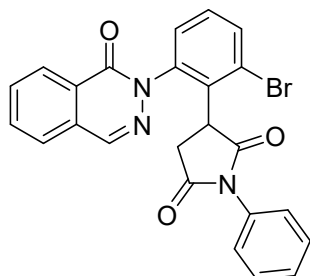

Purified by column chromatography on silica gel using hexane/ethylacetate (65/35)

**Yield:** 24% from condition B, 46% from condition C, Off-white coloured solid

**<sup>1</sup>H NMR (400 MHz, CDCl<sub>3</sub>) δ:** 8.41 (d, *J* = 7.68 Hz, 1H), 8.22 (s, 1H), 7.85–7.76 (m, 2H), 7.70 (d, *J* = 7.44 Hz, 1H), 7.56–7.54 (m, 2H), 7.35–7.22 (m, 4H), 7.12 (d, *J* = 8.88 Hz, 3H), 4.18–4.15 (m, 1H), 3.18–3.11 (m, 1H), 2.95–2.88 (m, 1H).

**<sup>13</sup>C NMR (100 MHz, CDCl<sub>3</sub>) δ:** 175.5, 174.7, 159.4, 141.9, 139.3, 134.2, 134.0, 132.8, 132.6, 132.1, 131.6, 129.5, 129.1, 128.6, 127.9, 127.3, 126.5, 126.2, 122.1, 42.2, 37.0.

**HRMS (ESI) m/z:** [M+Na]<sup>+</sup> Calculated for C<sub>24</sub>H<sub>16</sub>BrN<sub>3</sub>O<sub>3</sub>Na, 496.0267; Found 496.0266.

**methyl (*E*)-3-(2-(1-oxophthalazin-2(1H)-yl)phenyl)acrylate (3p)**

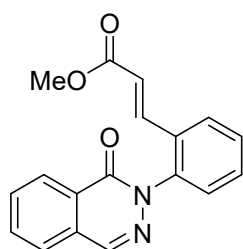

Purified by column chromatography on silica gel using hexane/ethylacetate (70/30)

**Yield:** 51% from condition A, Off-white coloured solid

**<sup>1</sup>H NMR (400 MHz, CDCl<sub>3</sub>) δ:** 8.42 (d, *J* = 7.76 Hz, 1H), 8.22 (s, 1H), 7.81 (td, *J* = 7.36 Hz, 1H), 7.75 (td, *J* = 7.56 Hz, 1H), 7.72 (d, *J* = 8.12 Hz, 2H), 7.47–7.40 (m, 3H), 7.37 (td, *J* = 7.6 Hz, 1H), 6.39 (d, *J* = 15.92 Hz, 1H), 3.61 (s, 3H).

**<sup>13</sup>C NMR (100 MHz, CDCl<sub>3</sub>) δ:** 166.9, 159.5, 141.1, 139.6, 138.8, 133.8, 132.2, 131.8, 130.9, 129.7, 129.2, 128.4, 128.2, 127.3, 127.2, 126.4, 120.2, 51.6.

**HRMS (ESI) m/z:** [M+Na]<sup>+</sup> Calculated for C<sub>18</sub>H<sub>14</sub>N<sub>2</sub>O<sub>3</sub>Na, 329.0897; Found 329.0897.

## 8. References

- [1] SMART (V 5.628), SAINT (V 6.45a), XPREP, SHELXTL; Bruker AXS Inc., Madison, Wisconsin, USA, **2004**.
- [2] G. M. Sheldrick, Siemens Area Detector Absorption Correction Program. University of Göttingen, Göttingen, Germany **2004**.
- [3] A. Altomare, G. Cascarano, C. Giacovazzo, A. Guagliardi, *J. Appl. Crystallogr.* **1993**, *26*, 343.
- [4] G. M. Sheldrick, SHELXL-2014, Program for Crystal Structure Solution and Refinement; University of Göttingen, Göttingen, Germany, **2014**.
- [5] L. J. Farrugia, WinGX-A Windows Program for Crystal Structure Analysis, *J. Appl. Crystallogr.* **2012**, *45*, 849.
- [6] B. Lu, Z. Xie, J. Lu, J. Liu, S. Cui, Y. Ma, X. Hu, Y. Liu, K. Zhong, *ACS Sustainable Chem. Eng.* **2019**, *7*, 134–138.
- [7] V. Krishnamurti, S. B. Munoz, X. Ispizua-Rodriguez, J. Vickerman, T. Mathew and G. K. Surya Prakash, *Chem. Commun.*, 2018, **54**, 10574-10577.

## 9. Copies of $^1\text{H}$ , $^{13}\text{C}$ and $^{19}\text{F}$ NMR spectra of synthesized derivatives

$^1\text{H}$  and  $^{13}\text{C}$  NMR spectrum of **3a**

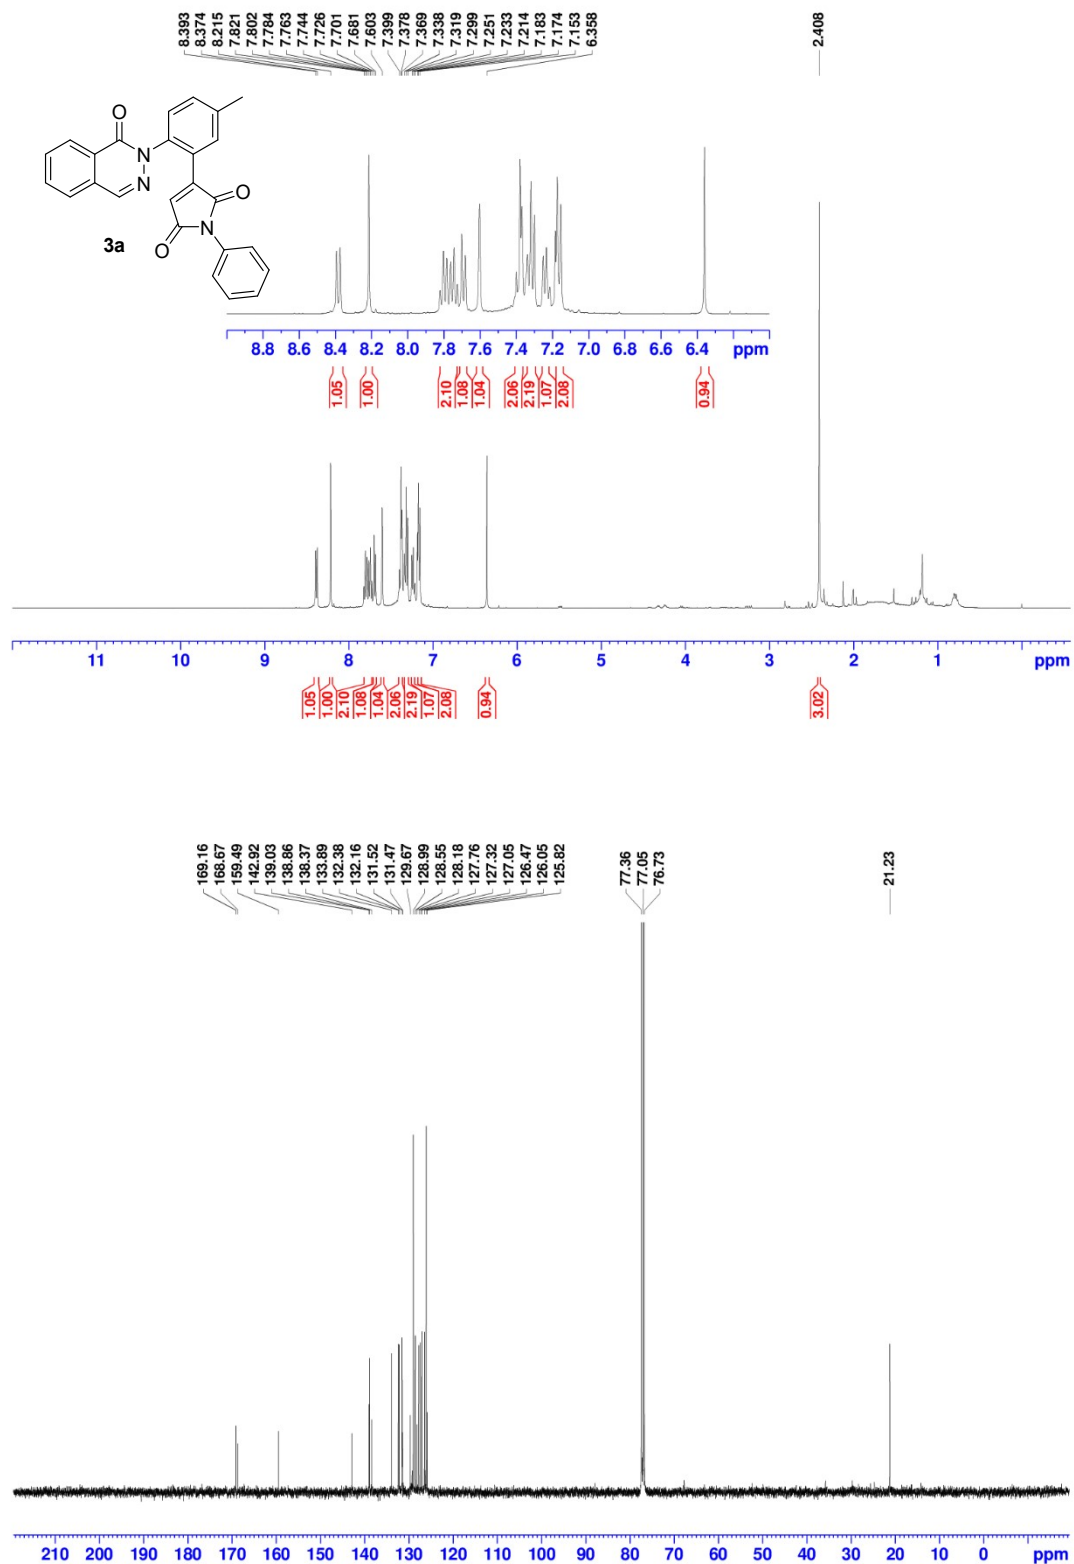

**<sup>1</sup>H and <sup>13</sup>C NMR spectrum of 3b**

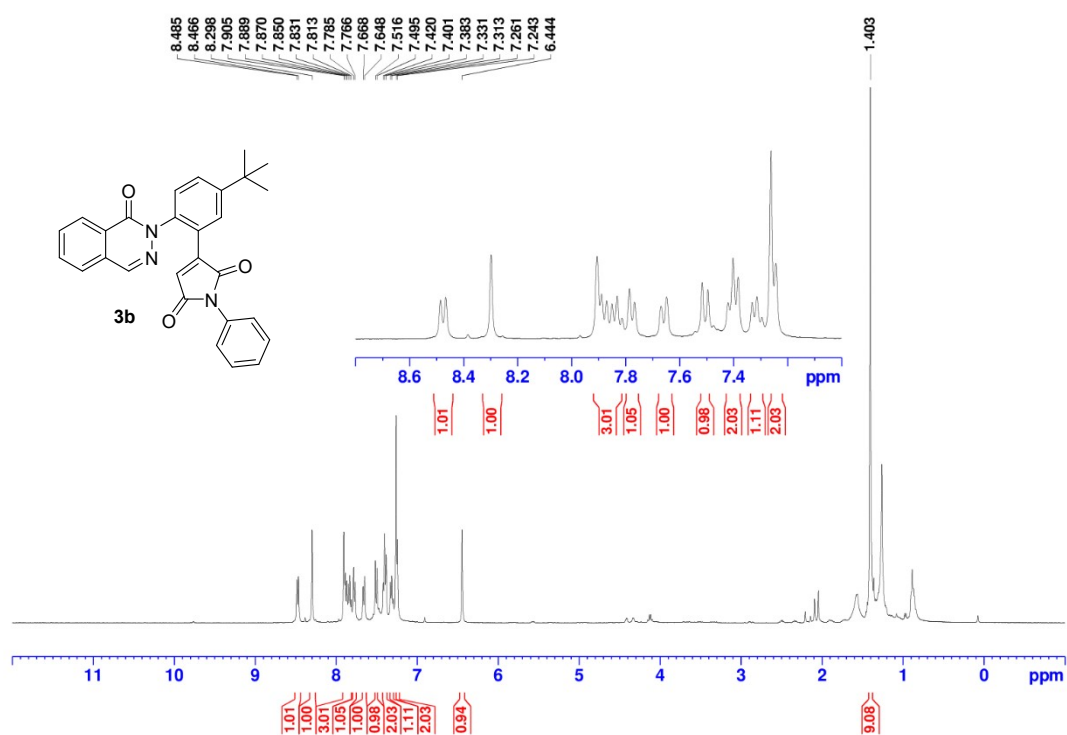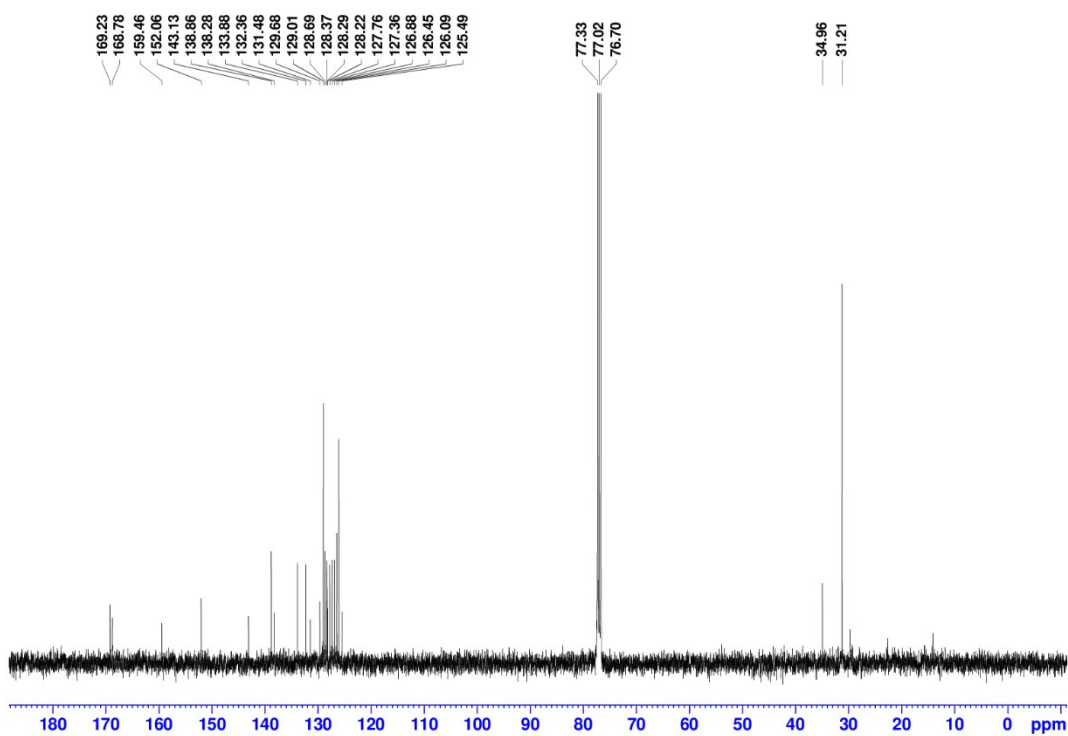

**<sup>1</sup>H, <sup>13</sup>C NMR and <sup>19</sup>F spectrum of 3c**

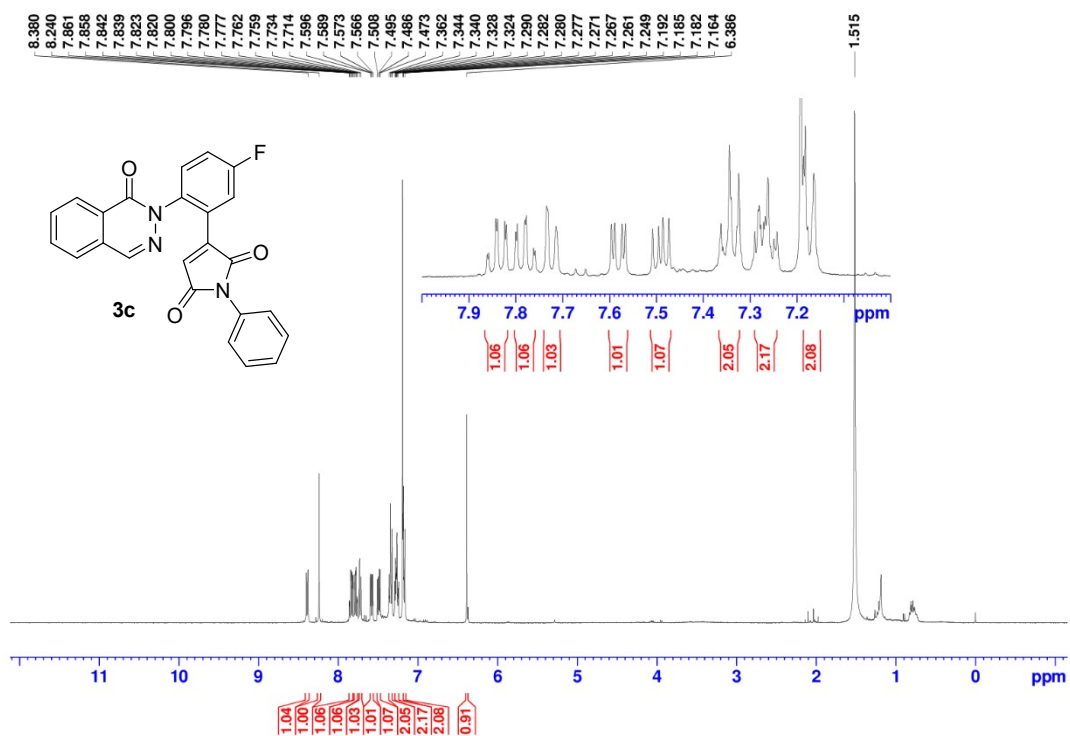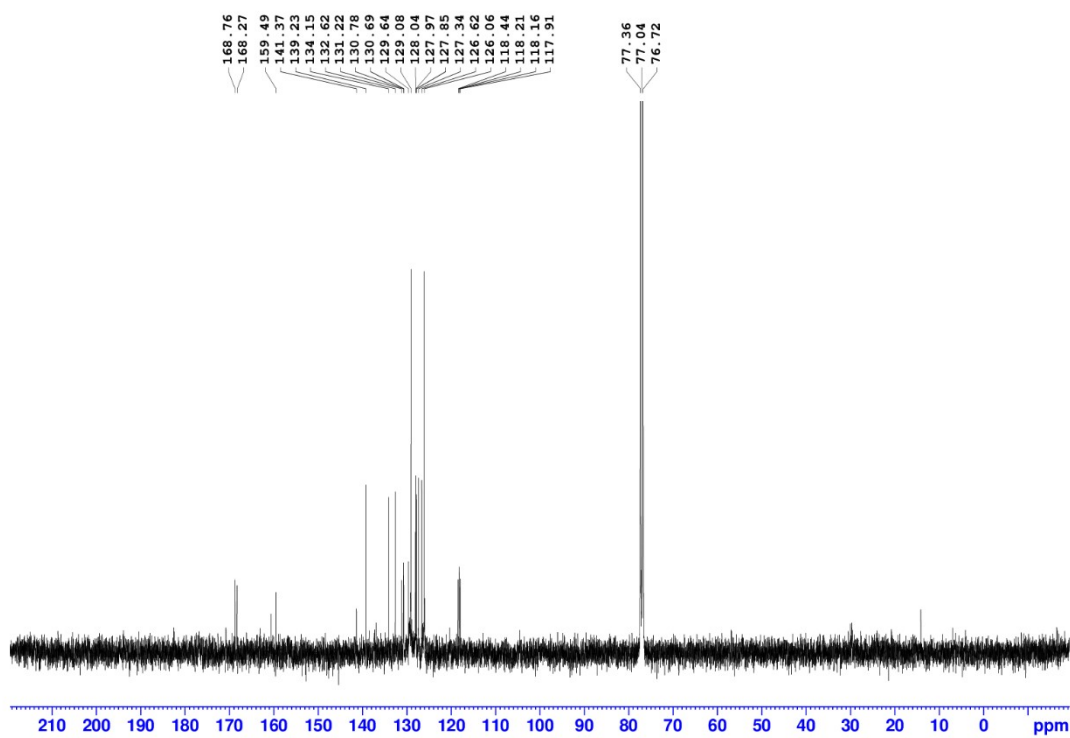

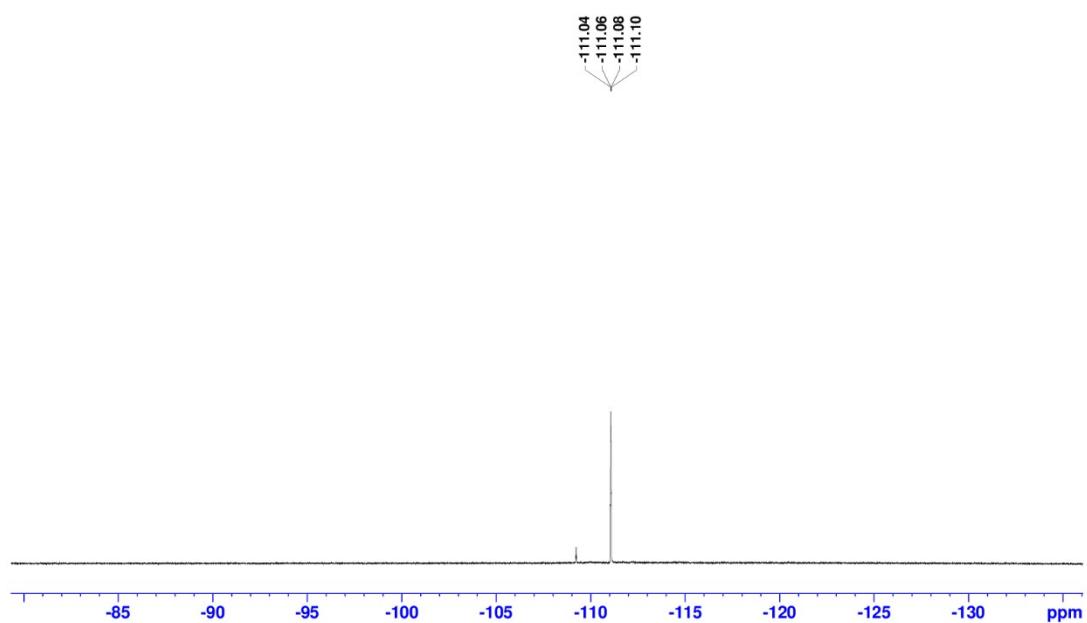

$^1\text{H}$ ,  $^{13}\text{C}$  NMR and  $^{19}\text{F}$  spectrum of 3d

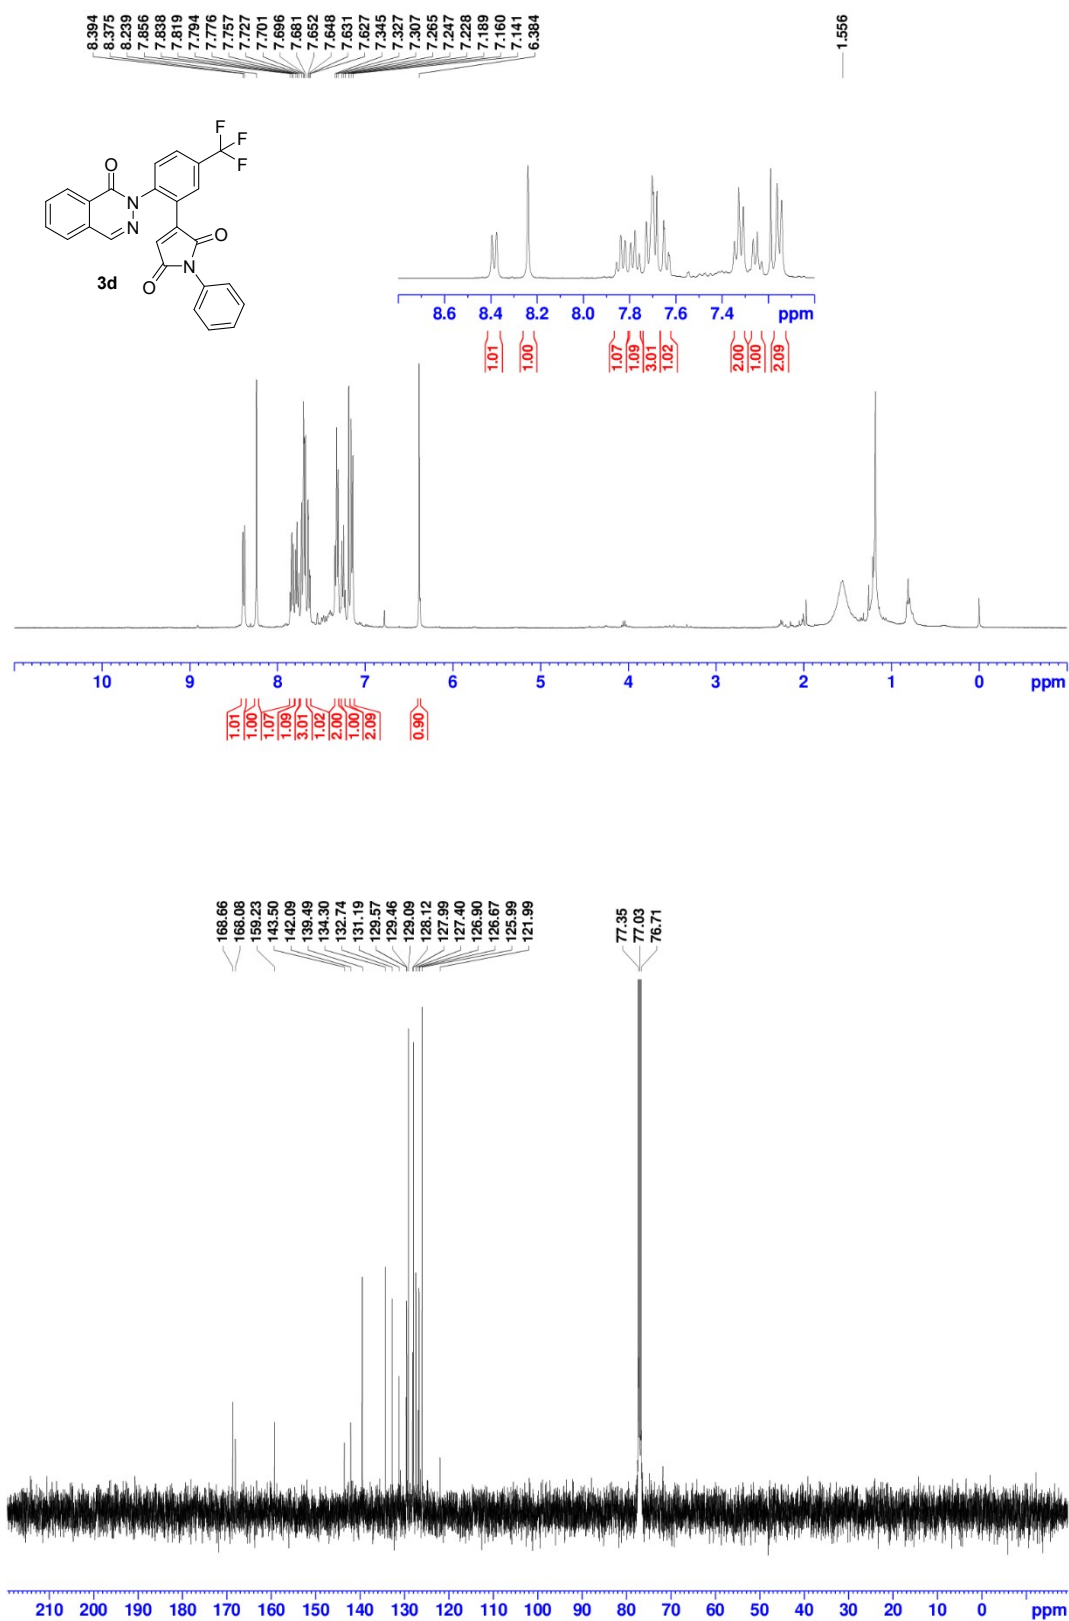

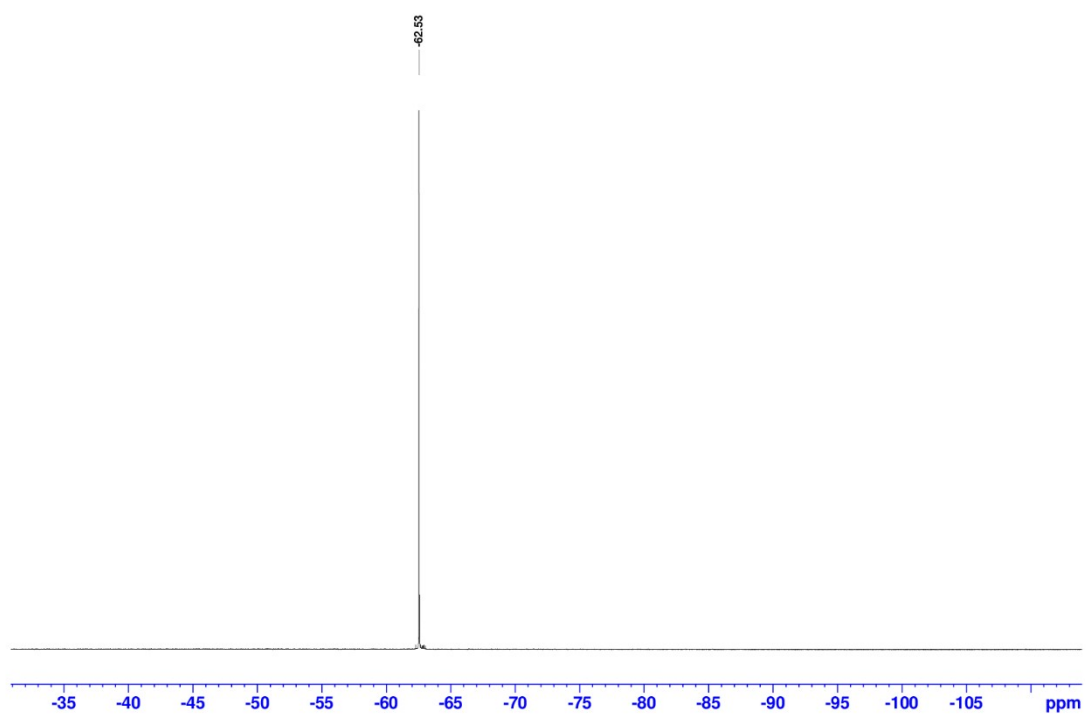

**$^1\text{H}$  and  $^{13}\text{C}$  NMR spectrum of 3e**

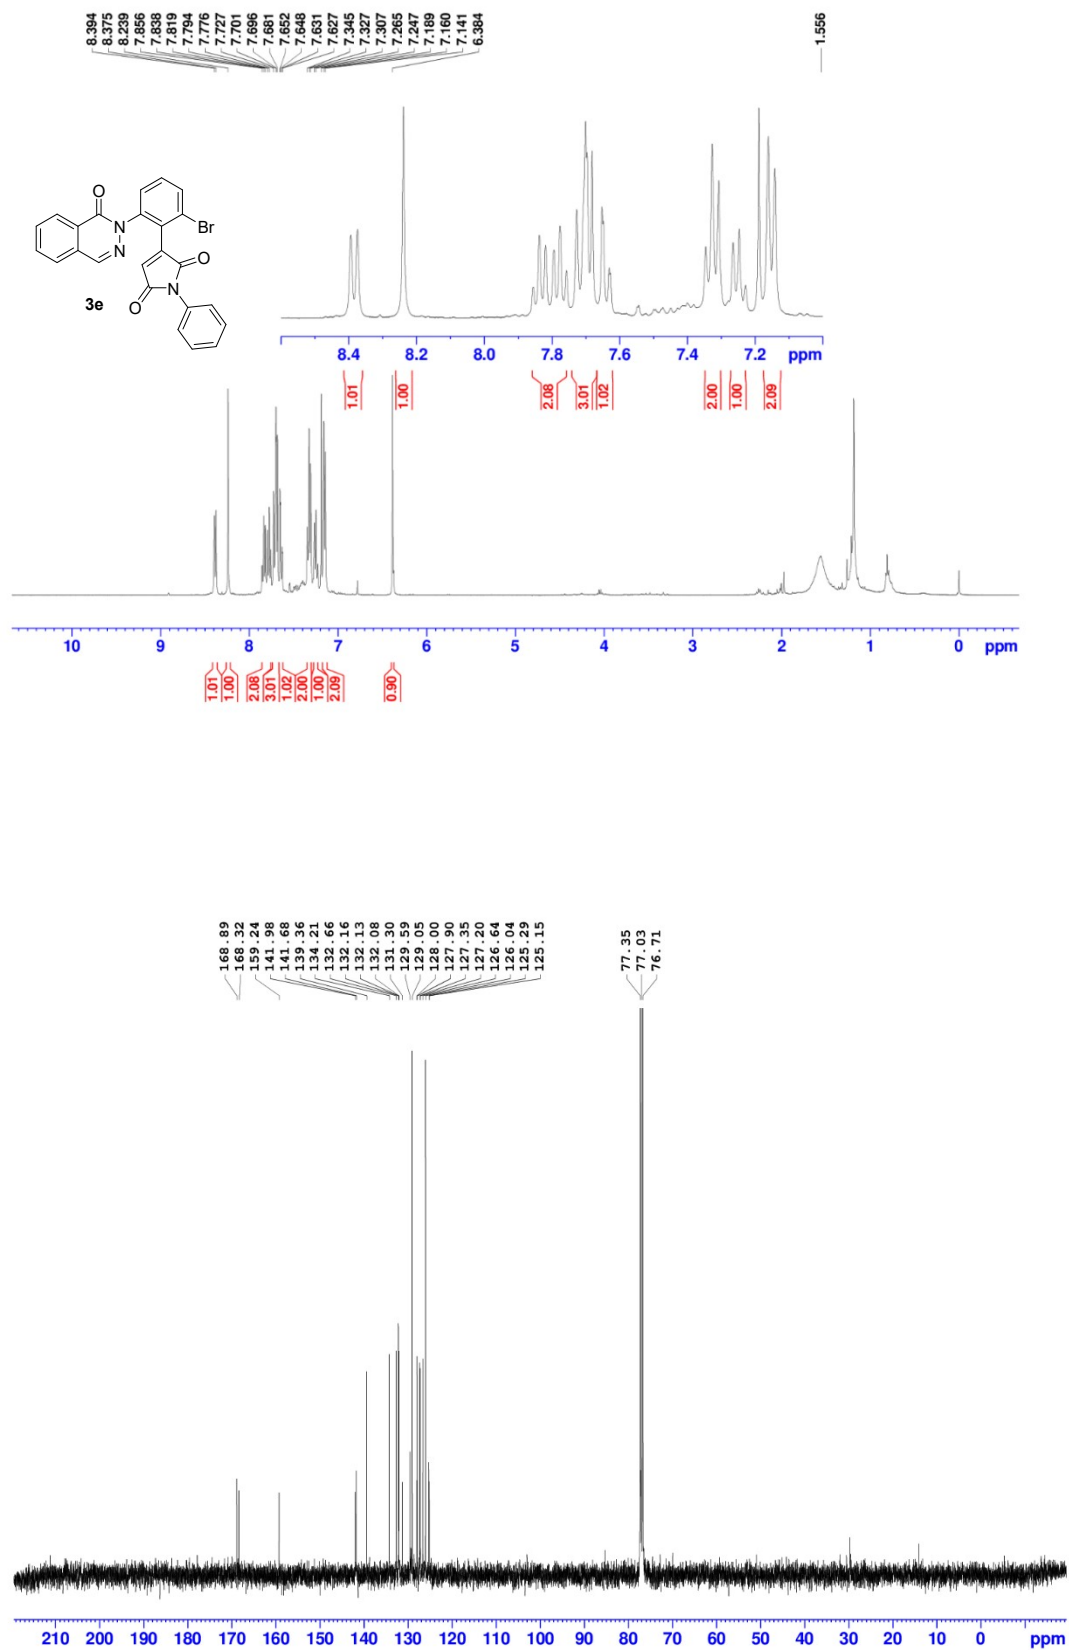

**$^1\text{H}$  and  $^{13}\text{C}$  NMR spectrum of 3f**

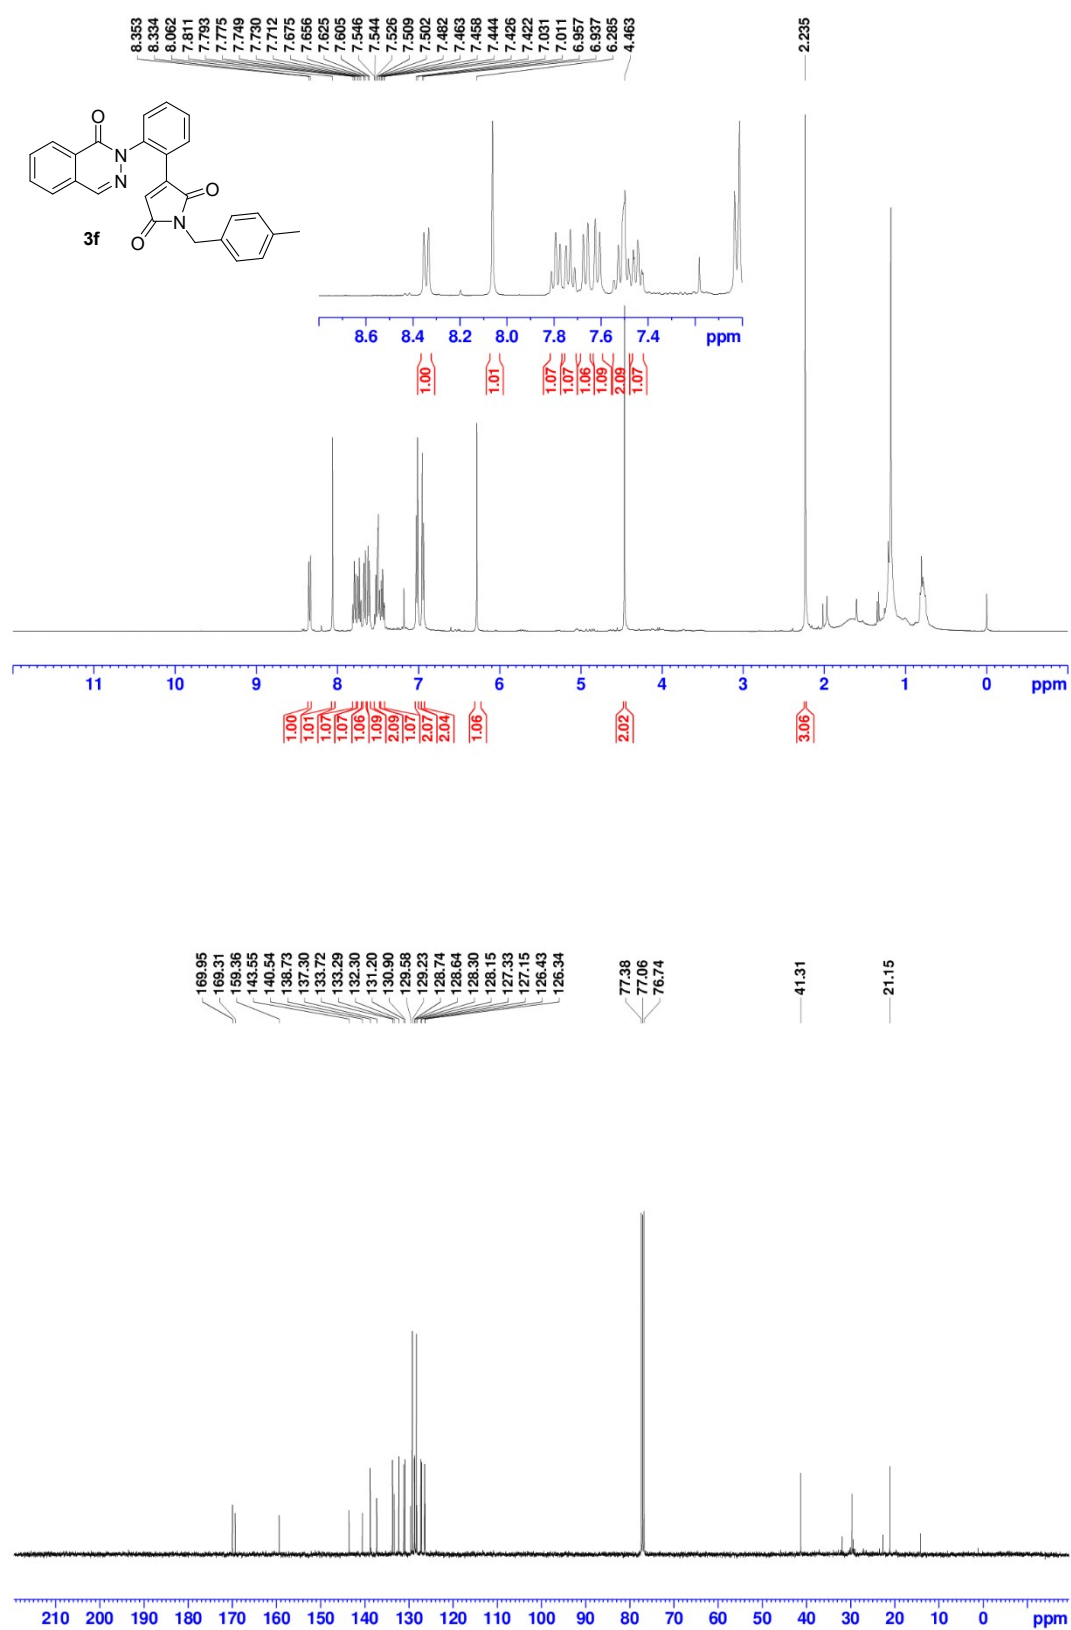

<sup>1</sup>H and <sup>13</sup>C NMR spectrum of 3g

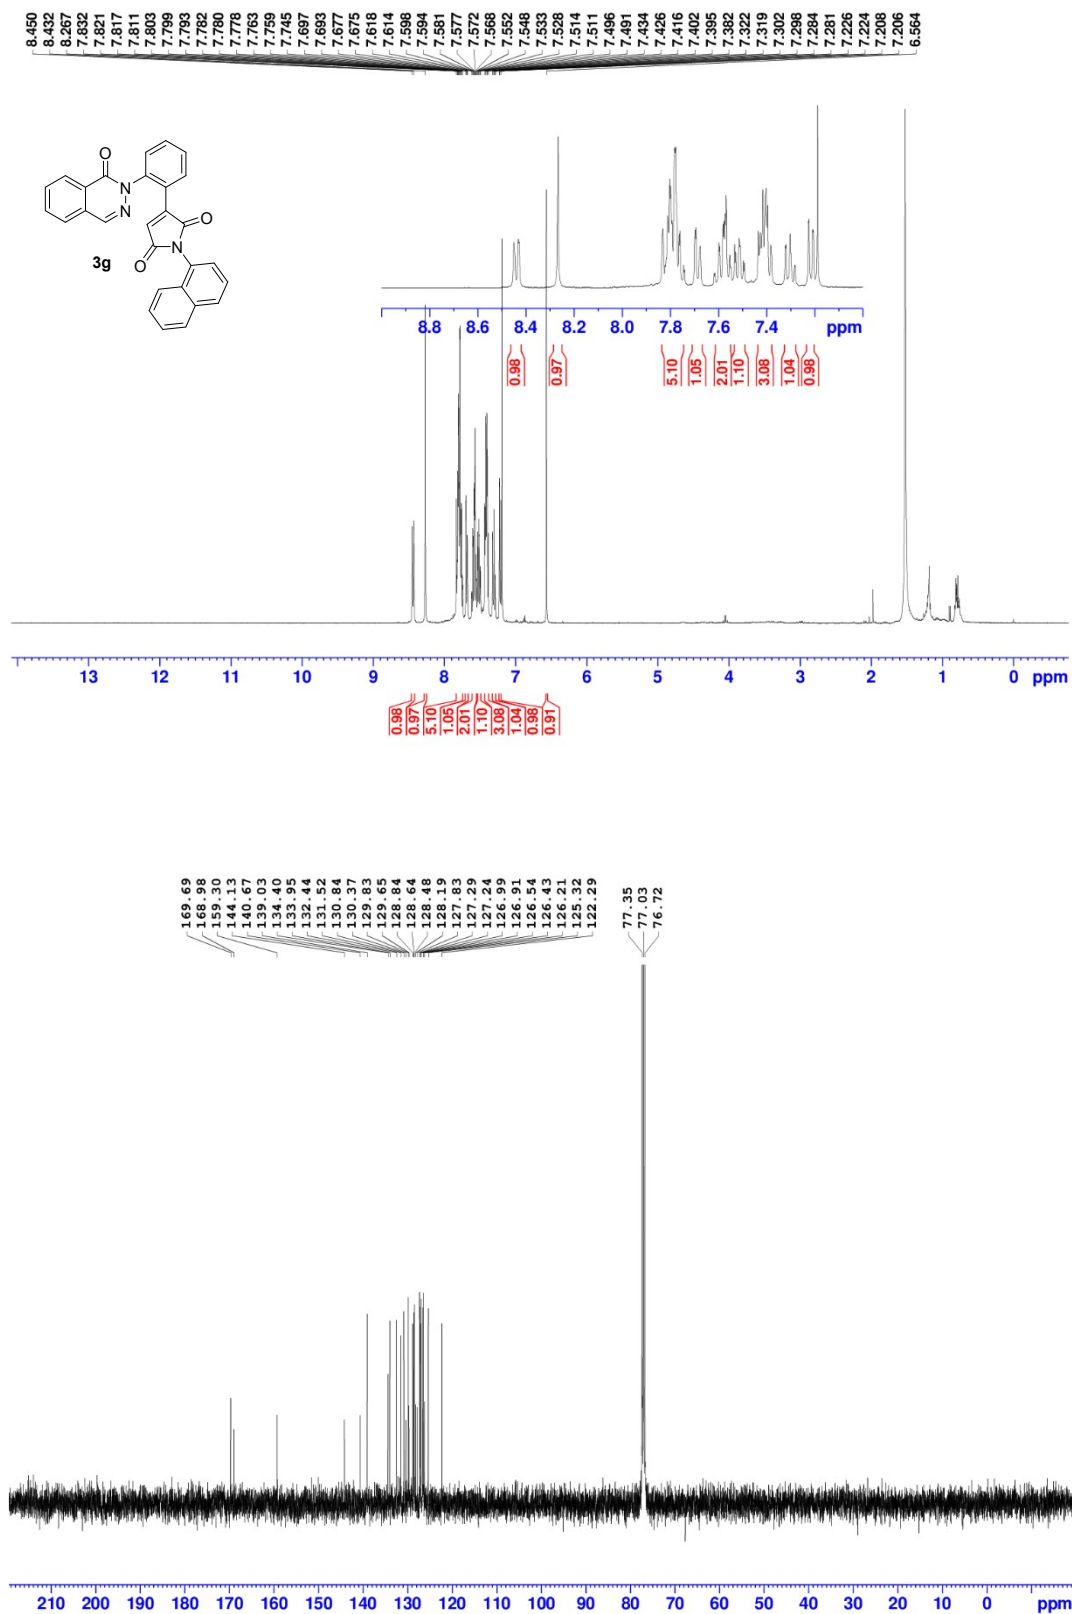

<sup>1</sup>H and <sup>13</sup>C NMR spectrum of 3h

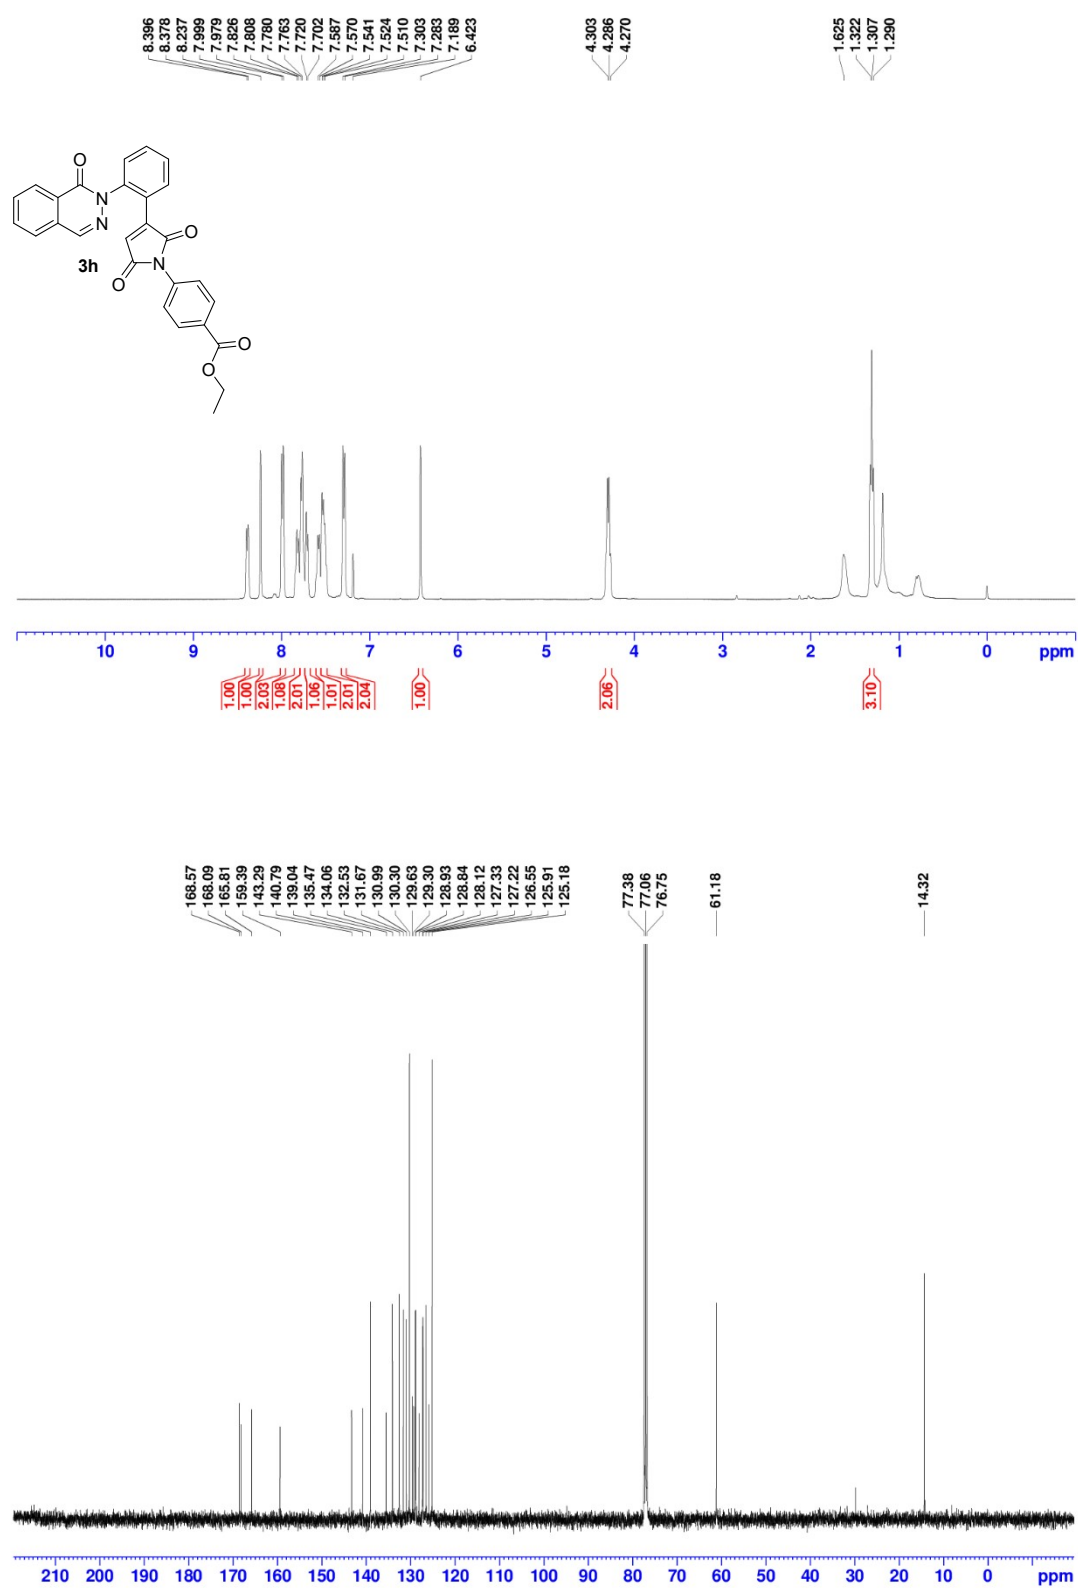

**$^1\text{H}$  and  $^{13}\text{C}$  NMR spectrum of 3i**

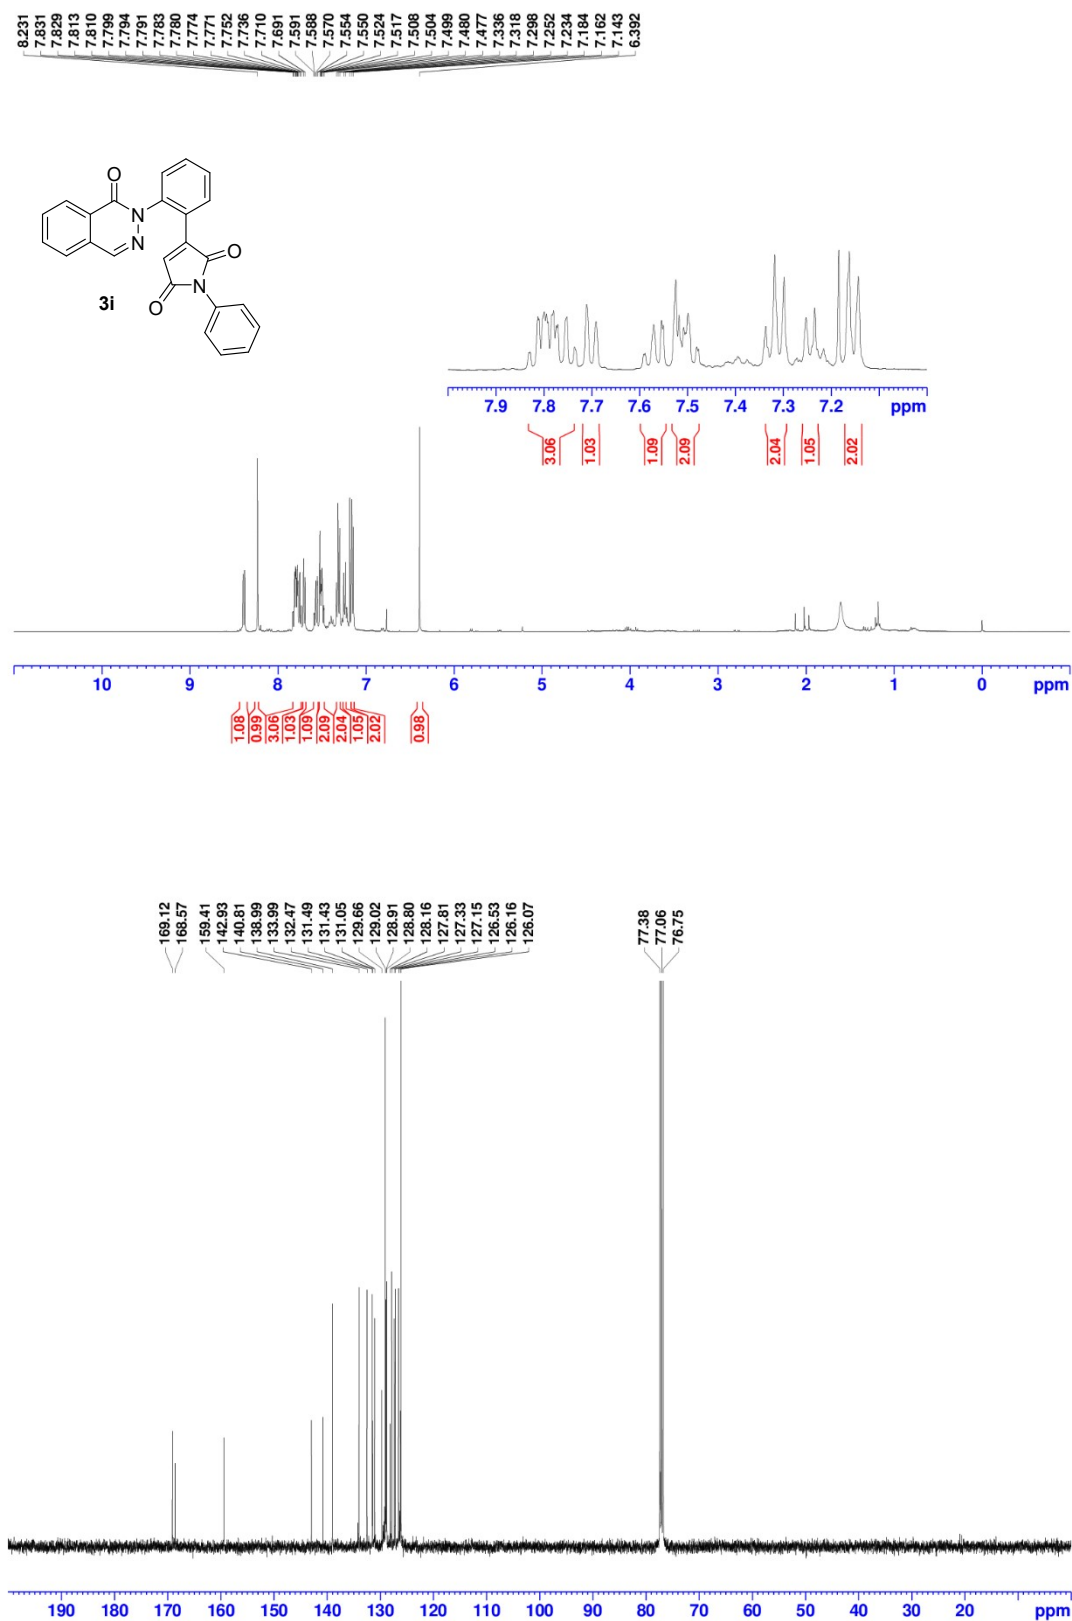

<sup>1</sup>H and <sup>13</sup>C NMR spectrum of 3k

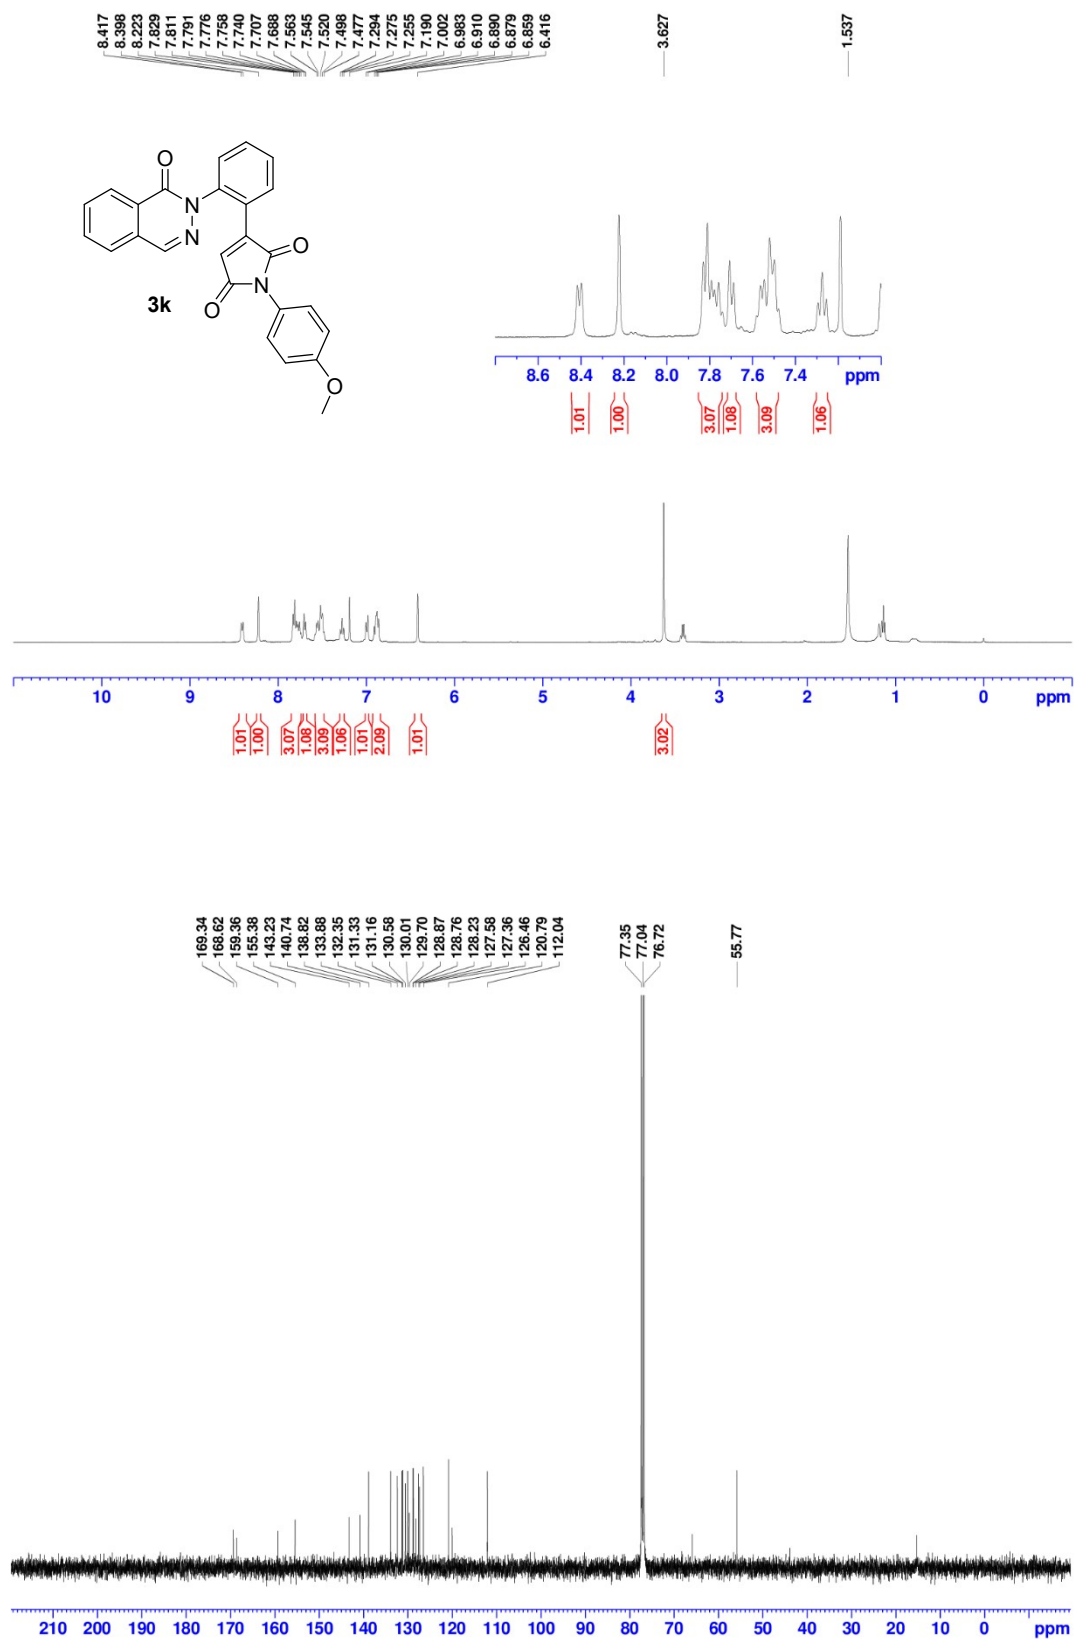

**$^1\text{H}$  and  $^{13}\text{C}$  NMR spectrum of 3I**

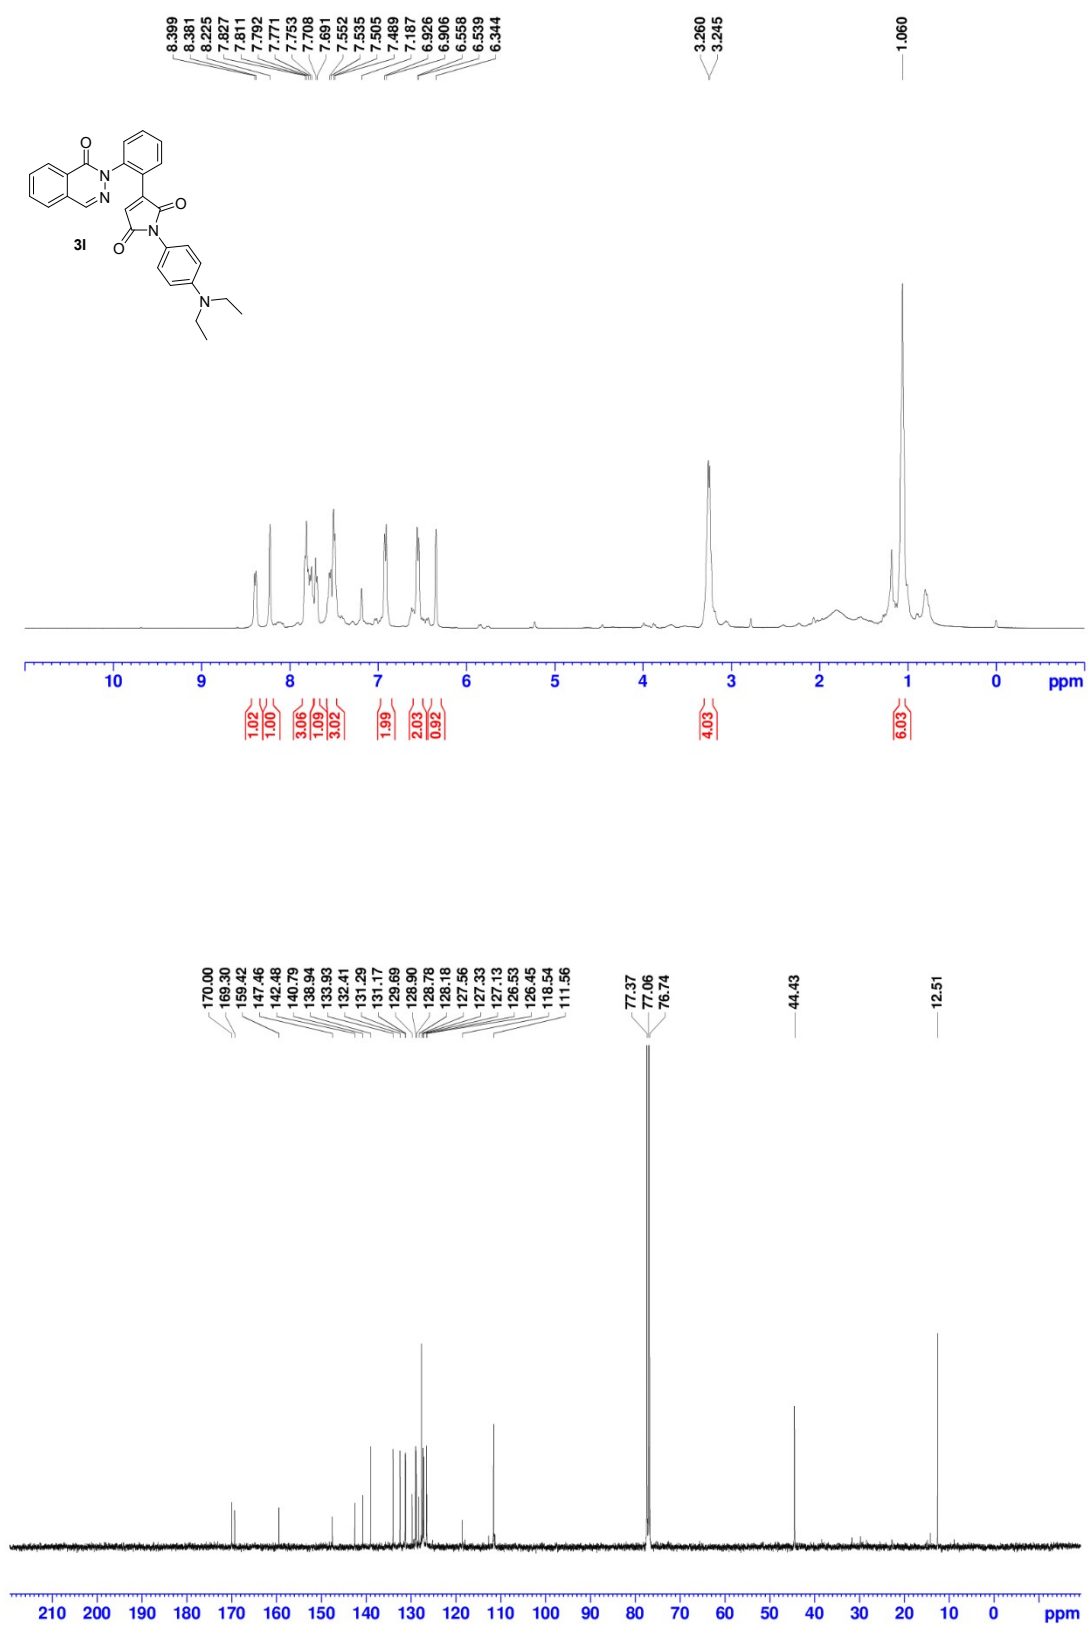

**$^1\text{H}$  and  $^{13}\text{C}$  NMR spectrum of 3m**

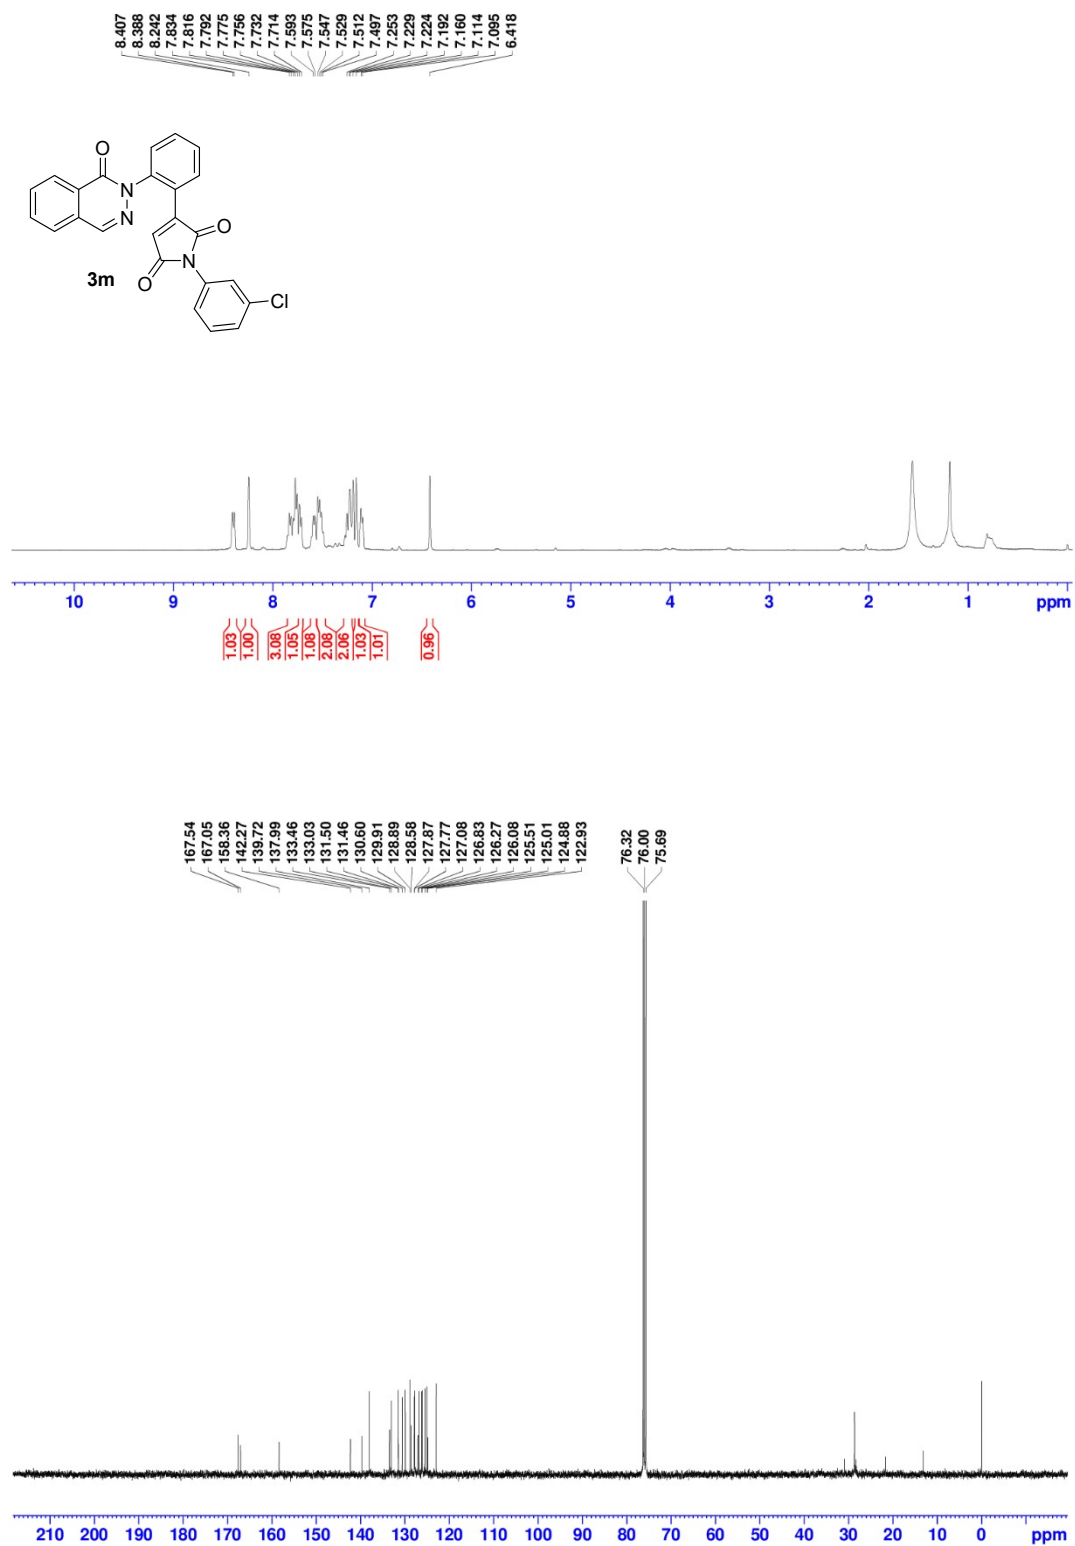

**$^1\text{H}$  and  $^{13}\text{C}$  NMR spectrum of 3n**

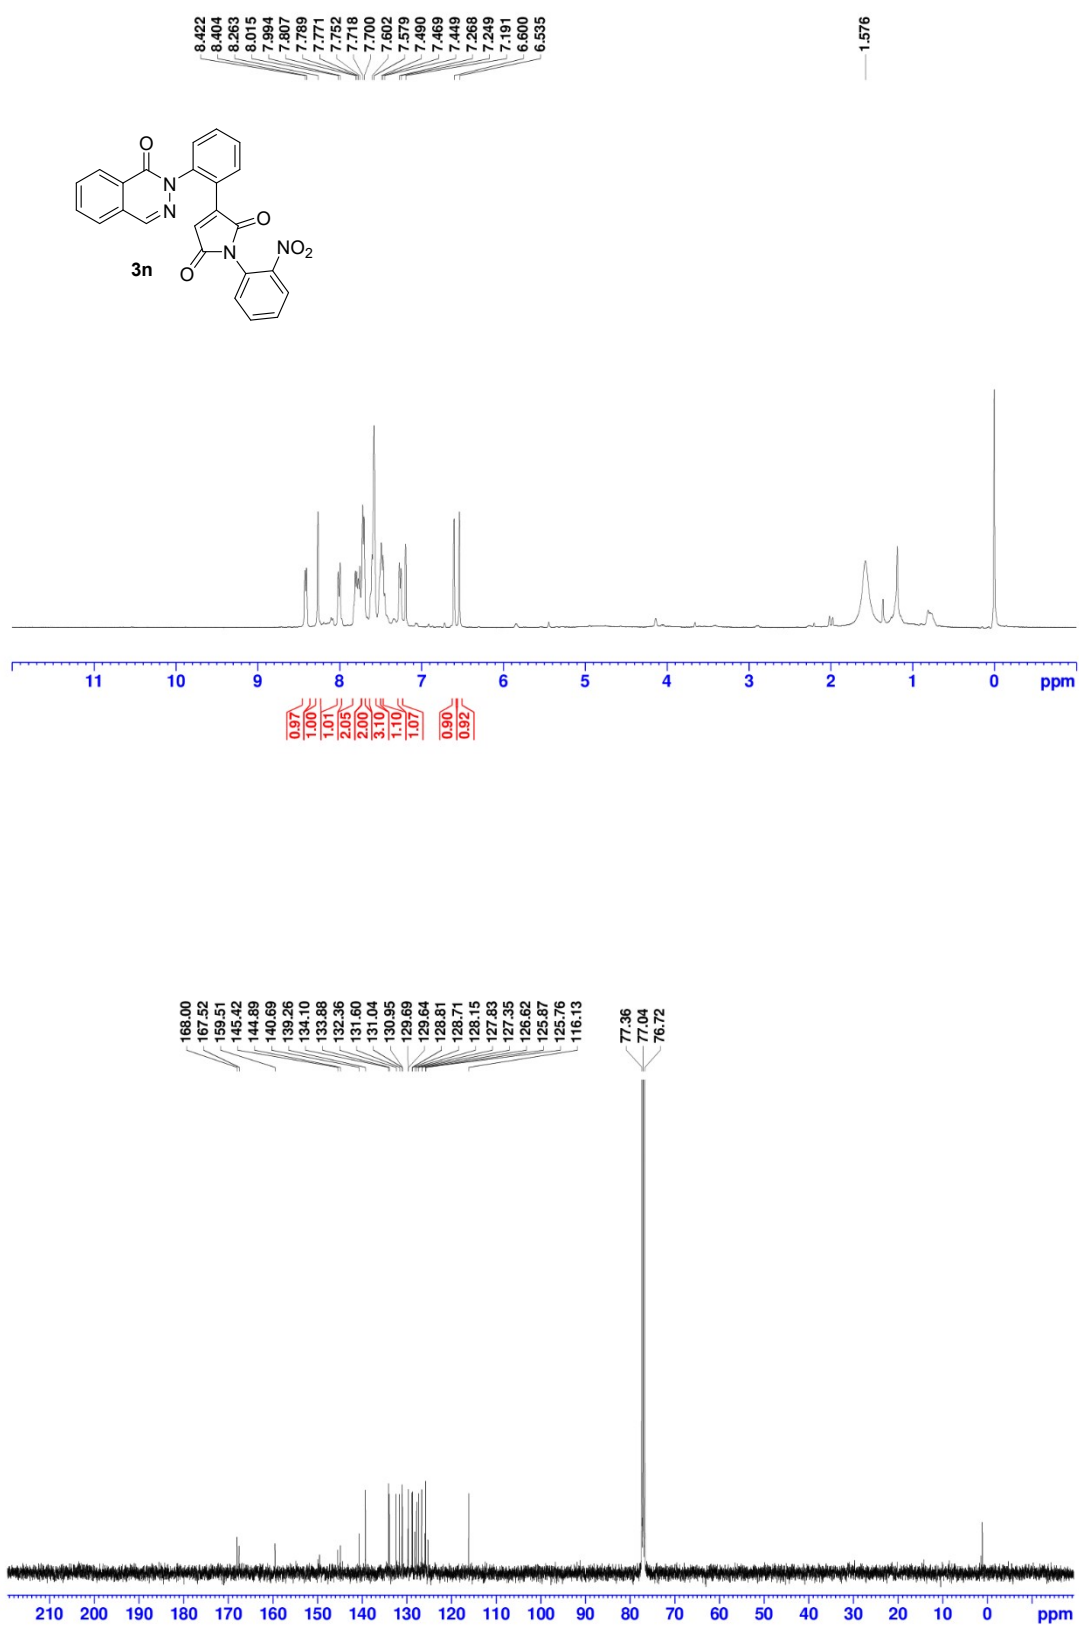

**$^1\text{H}$  and  $^{13}\text{C}$  NMR spectrum of 3o**

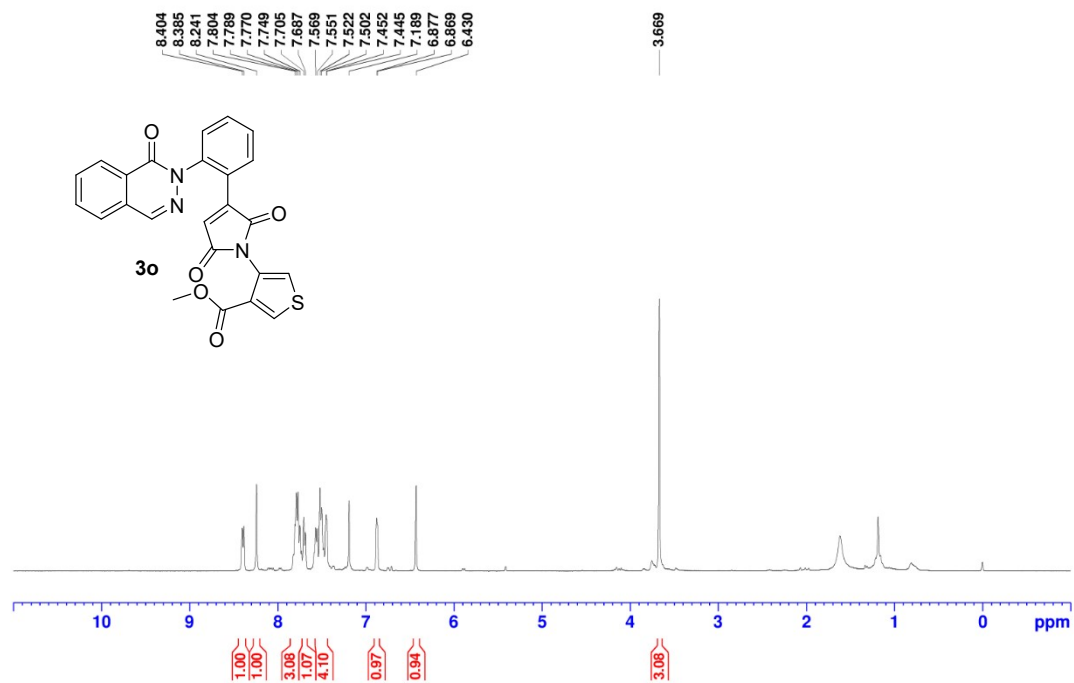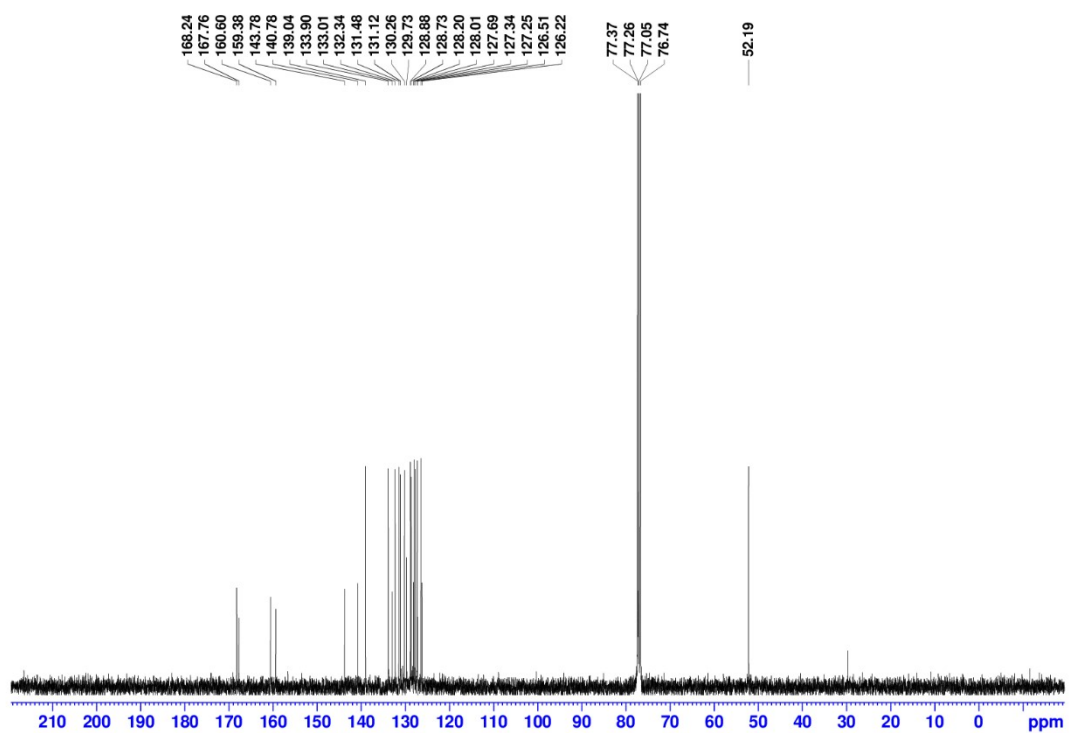

<sup>1</sup>H and <sup>13</sup>C NMR spectrum of 4a

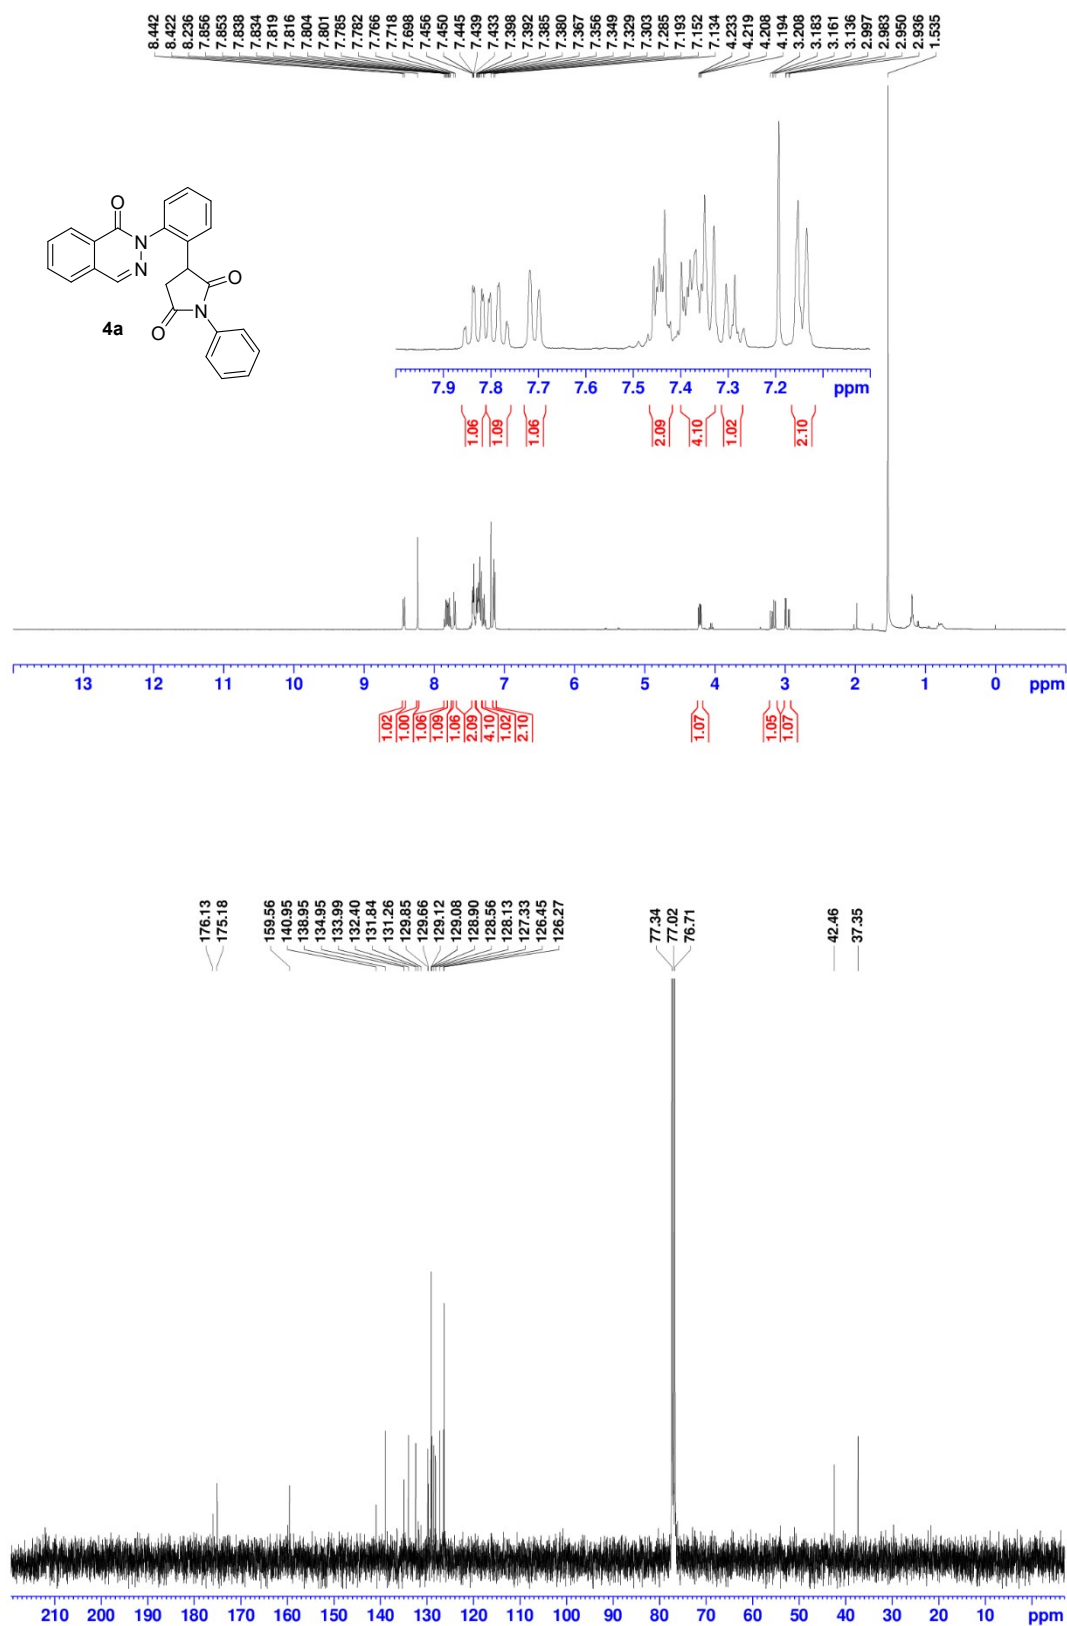

<sup>1</sup>H and <sup>13</sup>C NMR spectrum of 4b

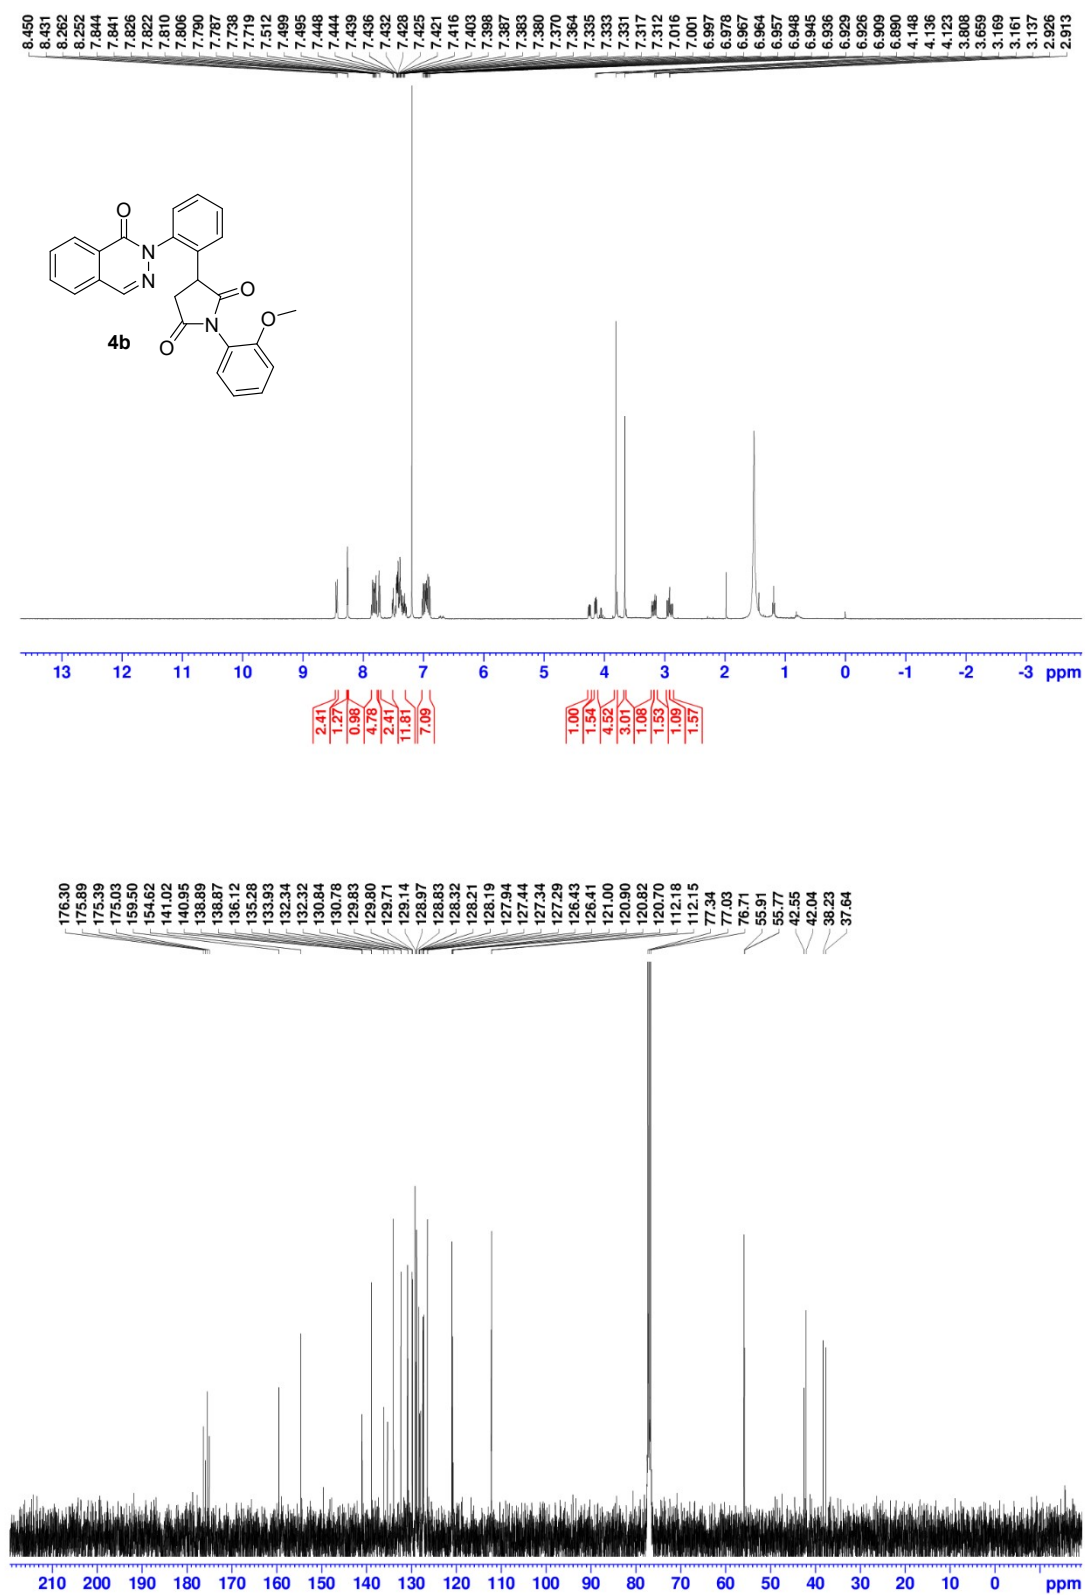

<sup>1</sup>H and <sup>13</sup>C NMR spectrum of 4c

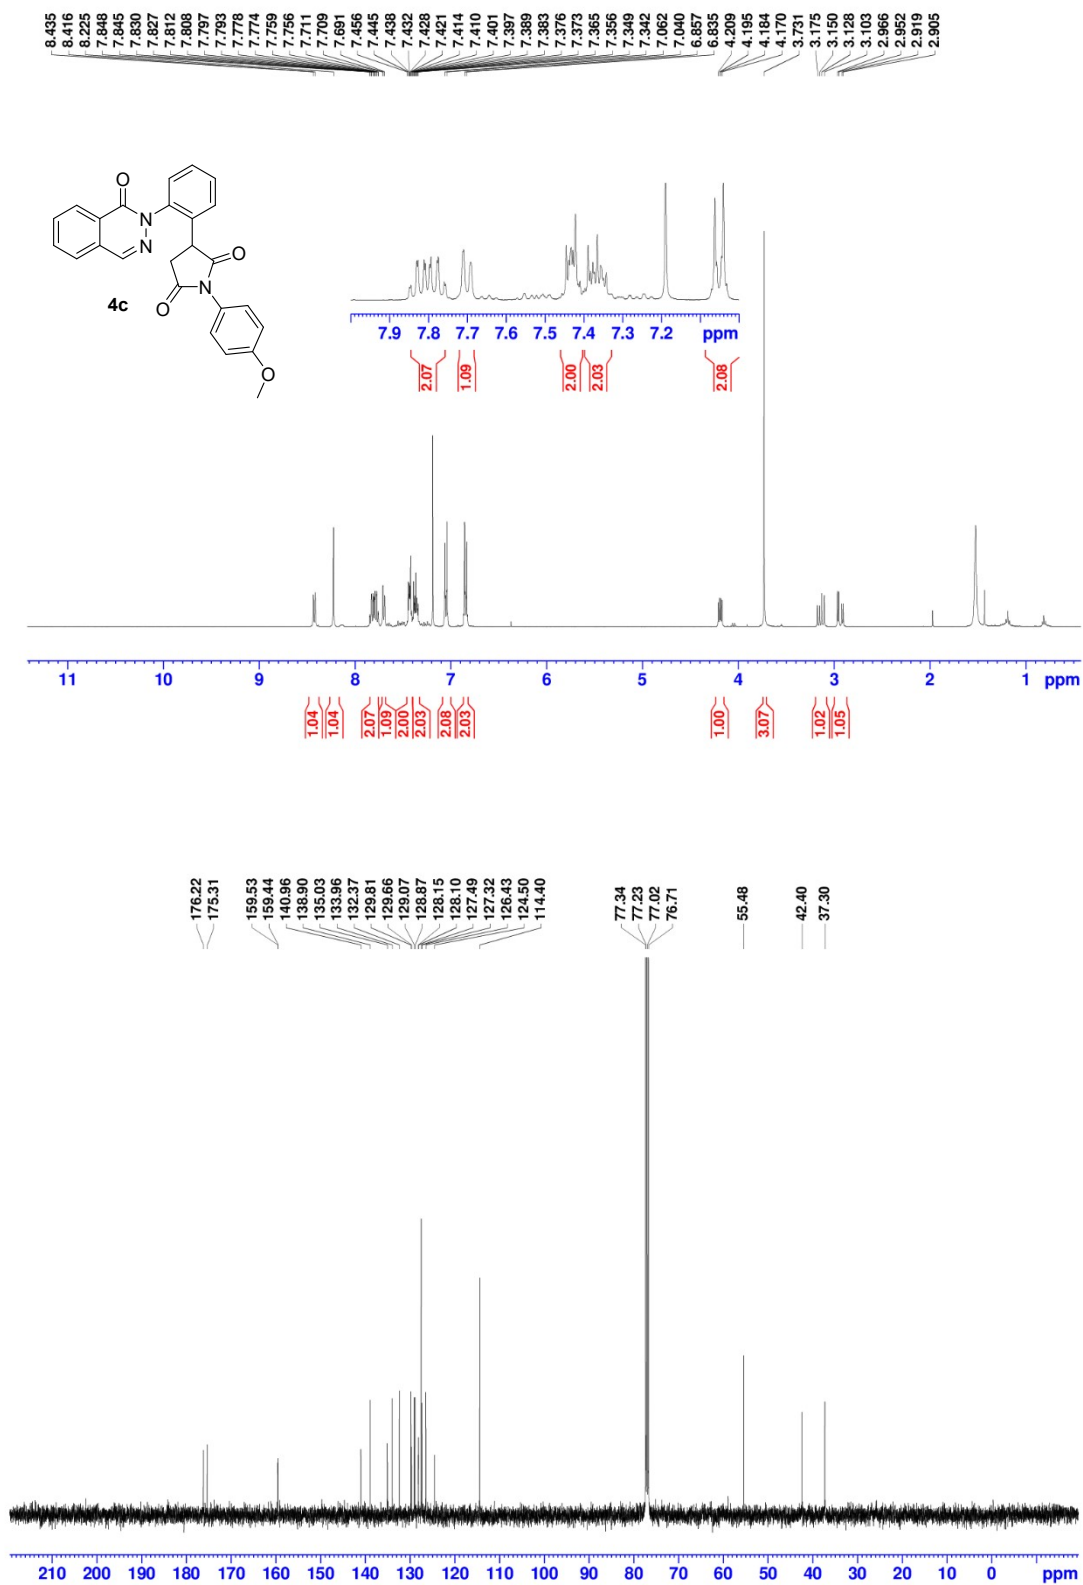

**$^1\text{H}$  and  $^{13}\text{C}$  NMR spectrum of 4d**

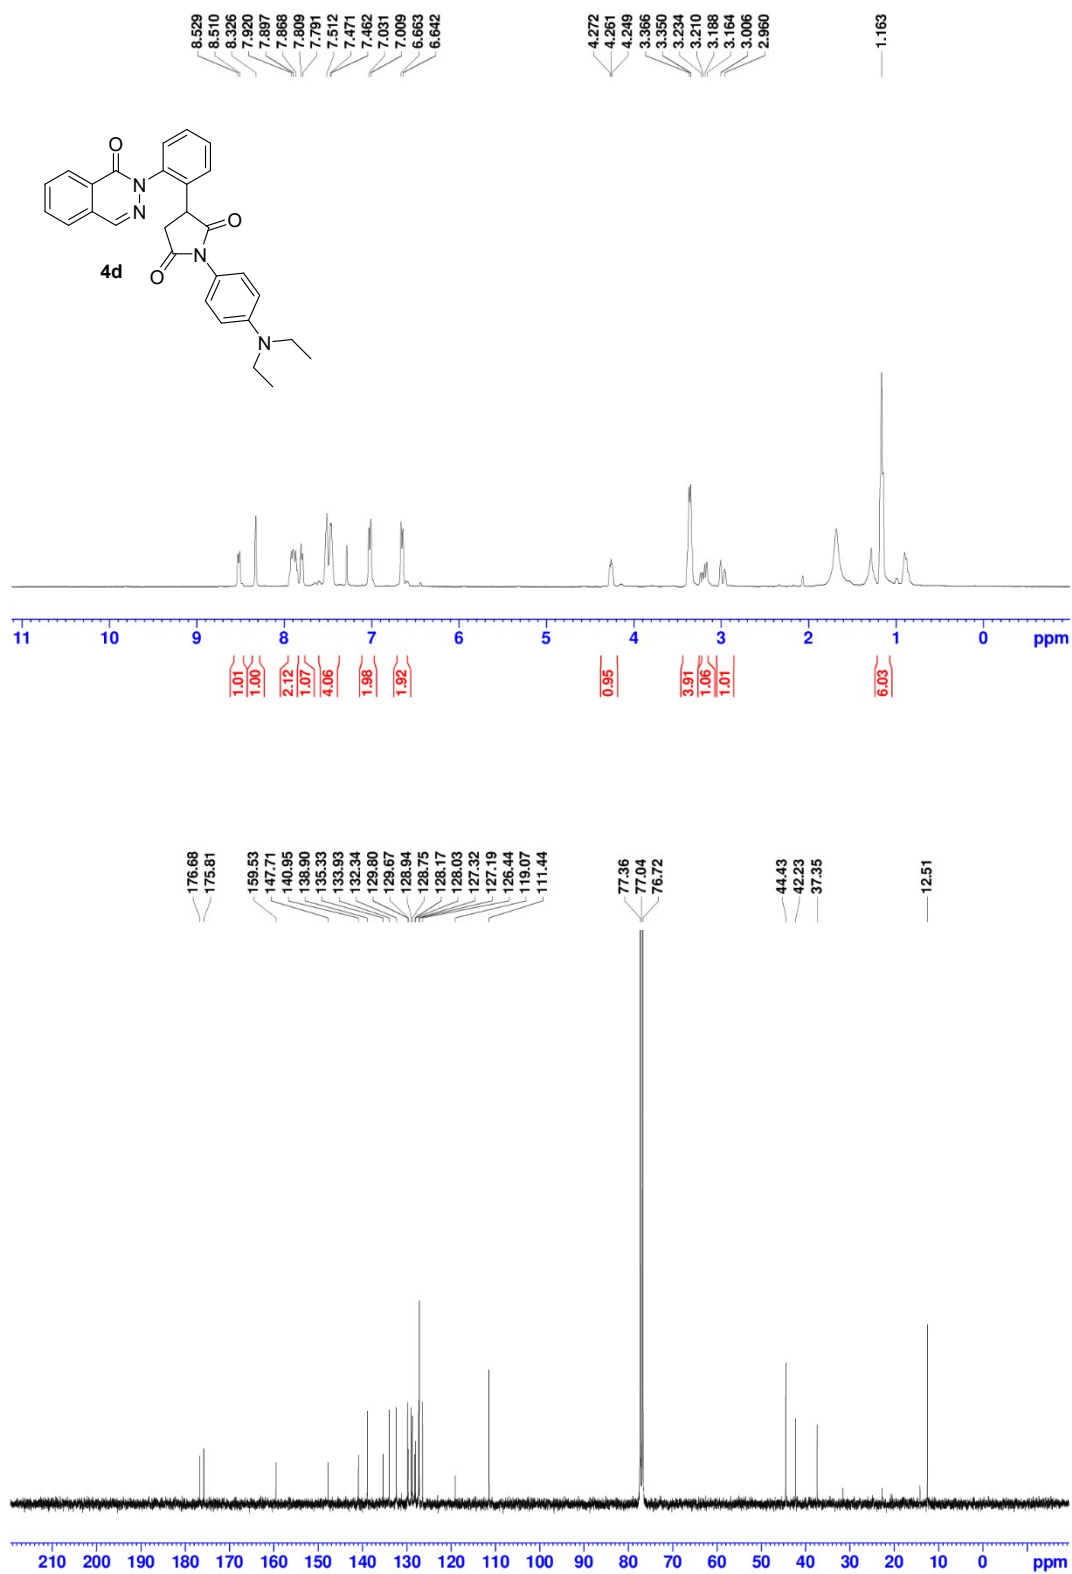

**$^1\text{H}$  and  $^{13}\text{C}$  NMR spectrum of 4e**

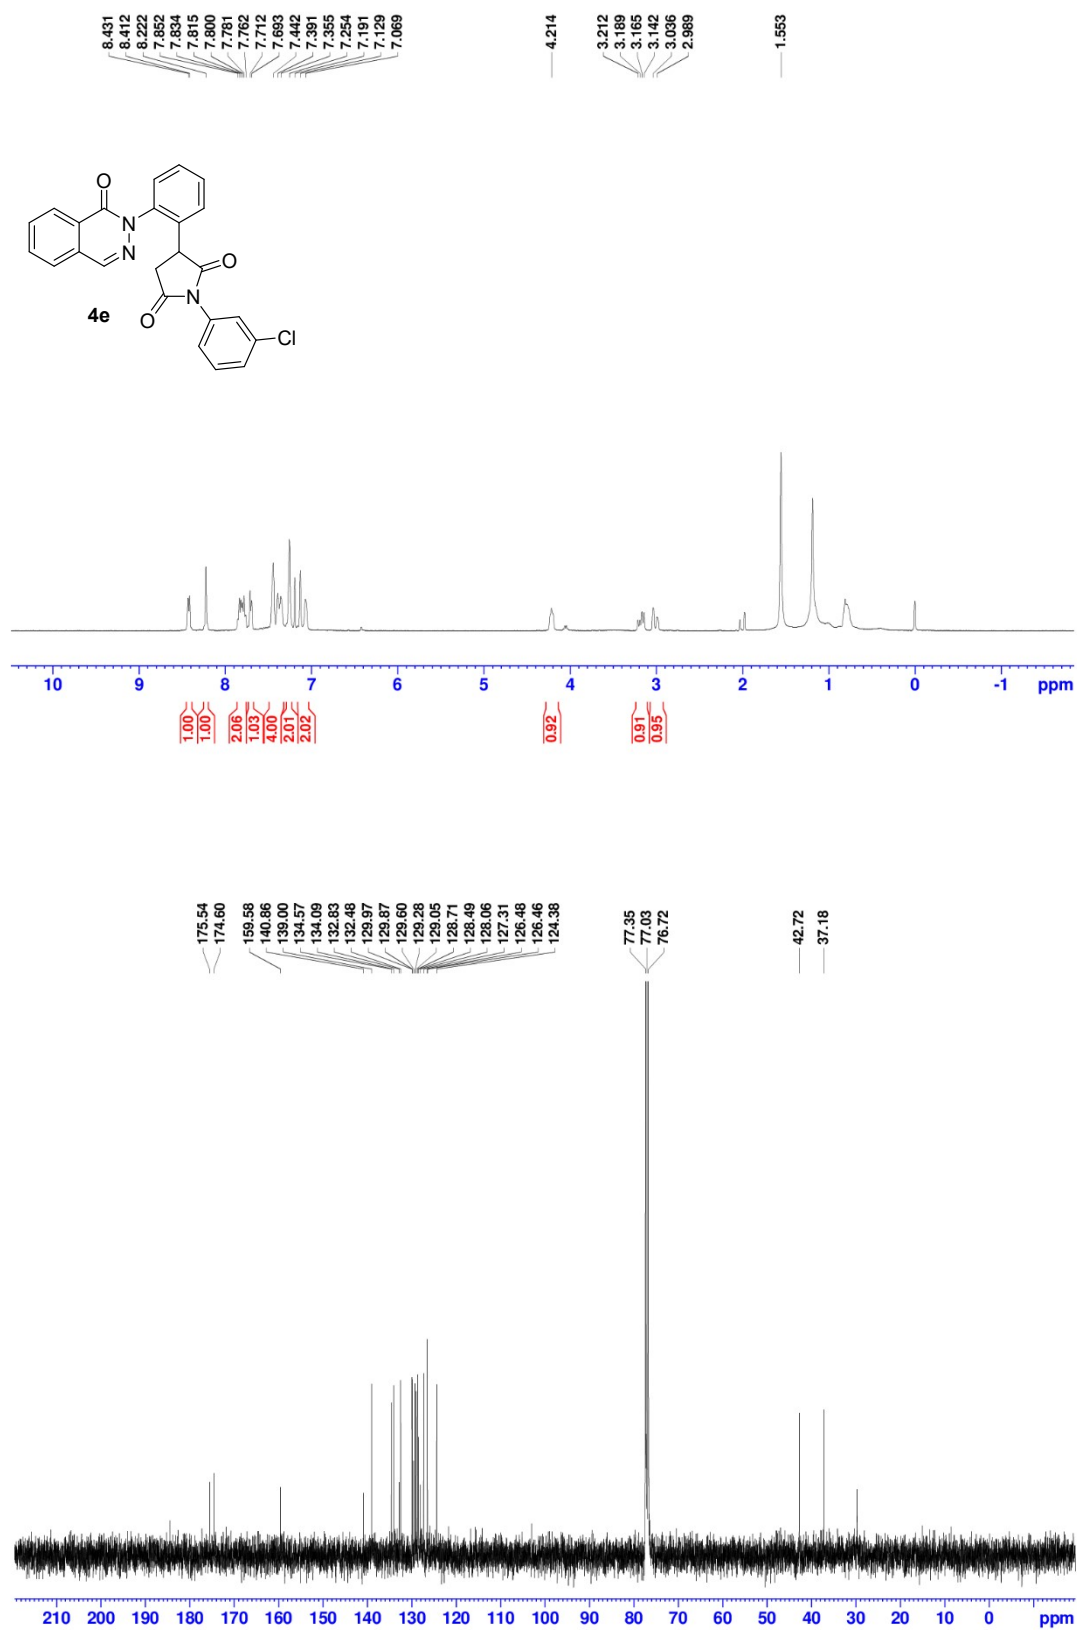

**$^1\text{H}$  and  $^{13}\text{C}$  NMR spectrum of 4f**

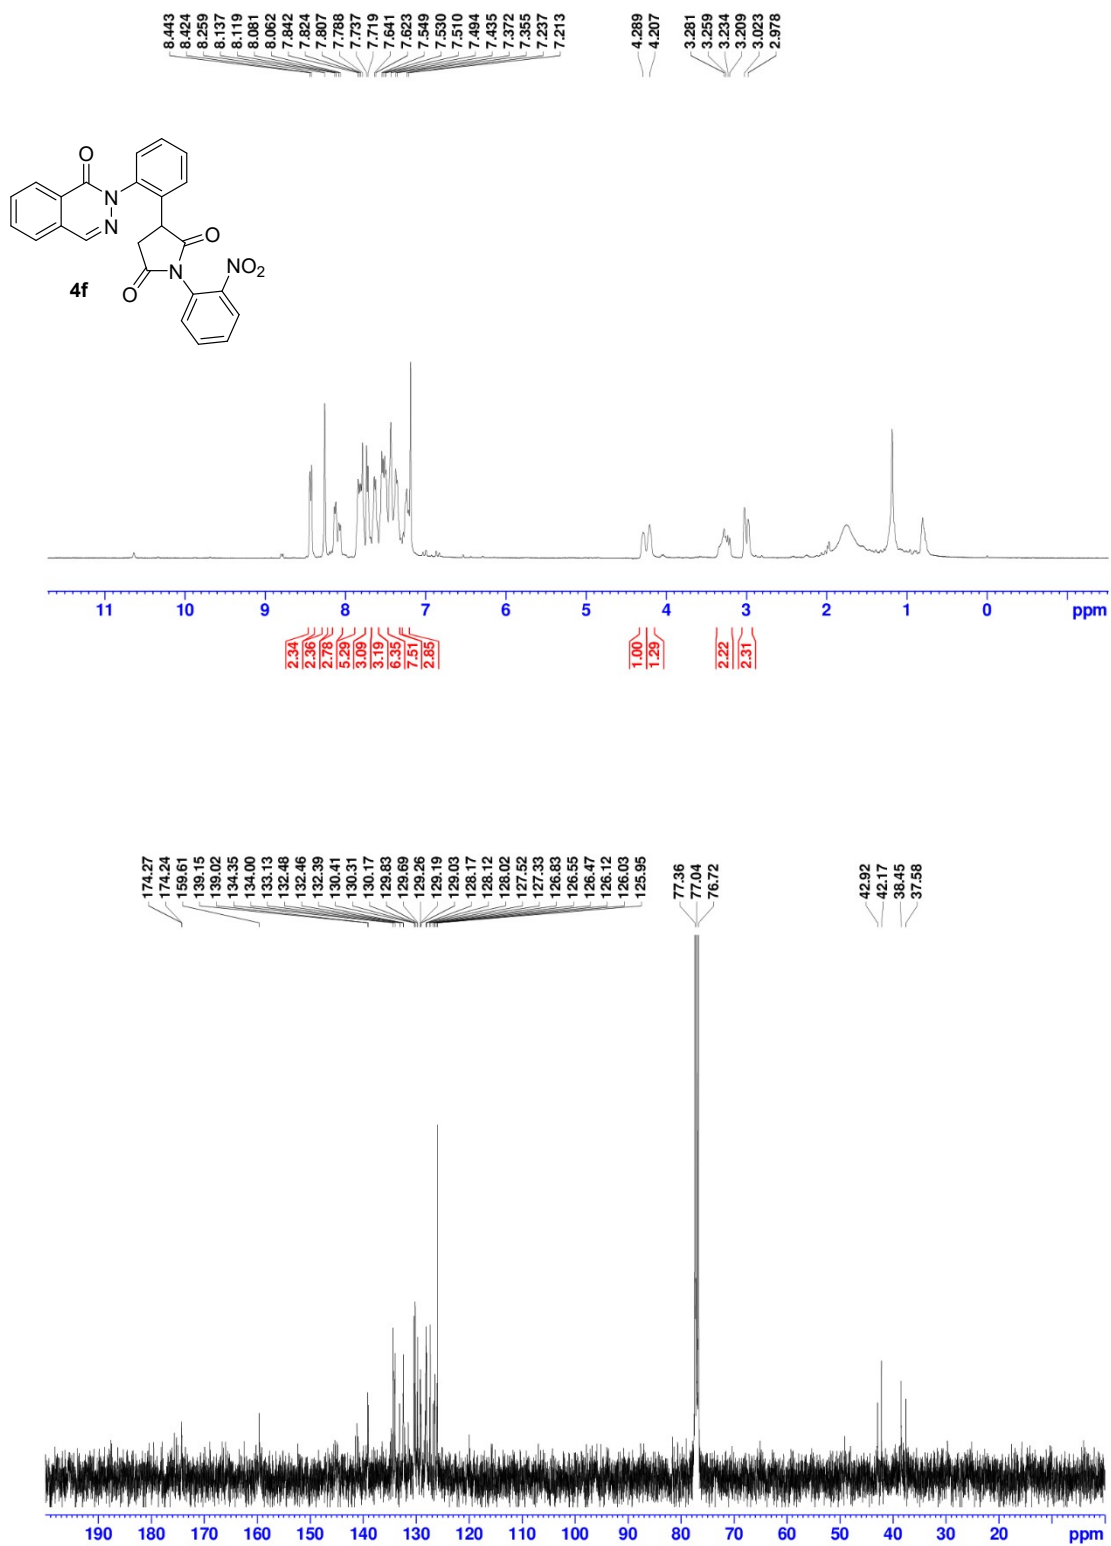

<sup>1</sup>H and <sup>13</sup>C NMR spectrum of 4g

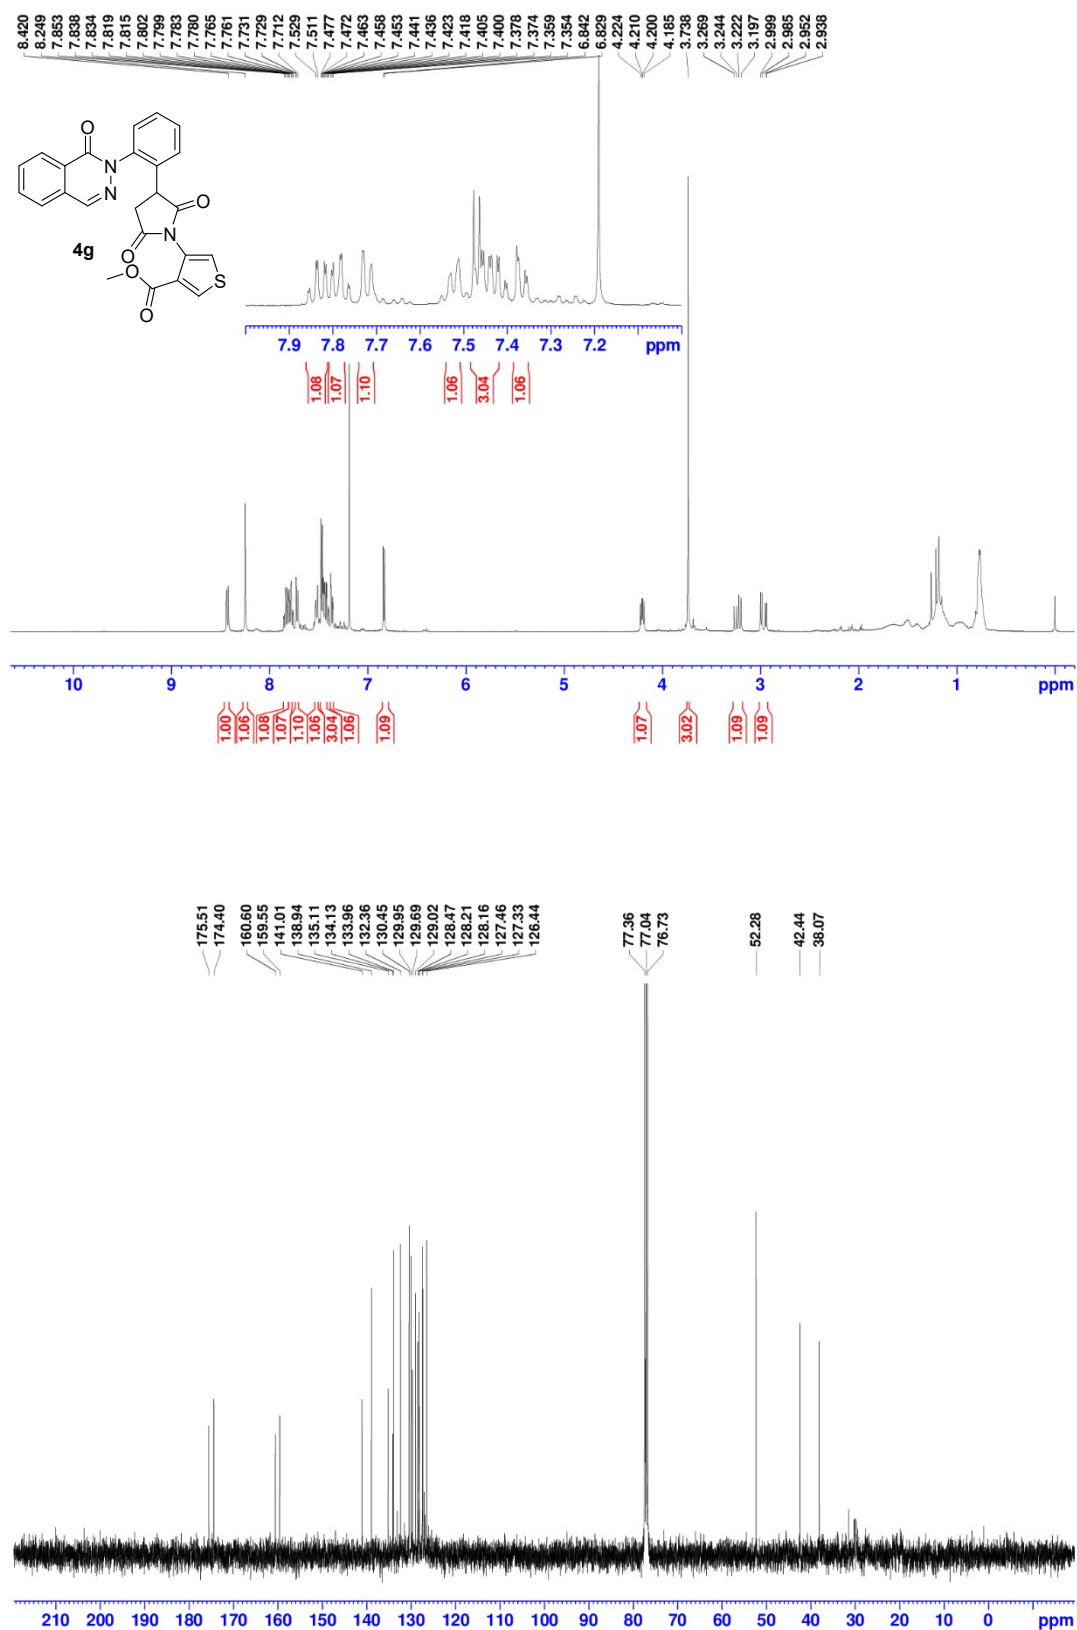

# <sup>1</sup>H and <sup>13</sup>C NMR spectrum of 4h

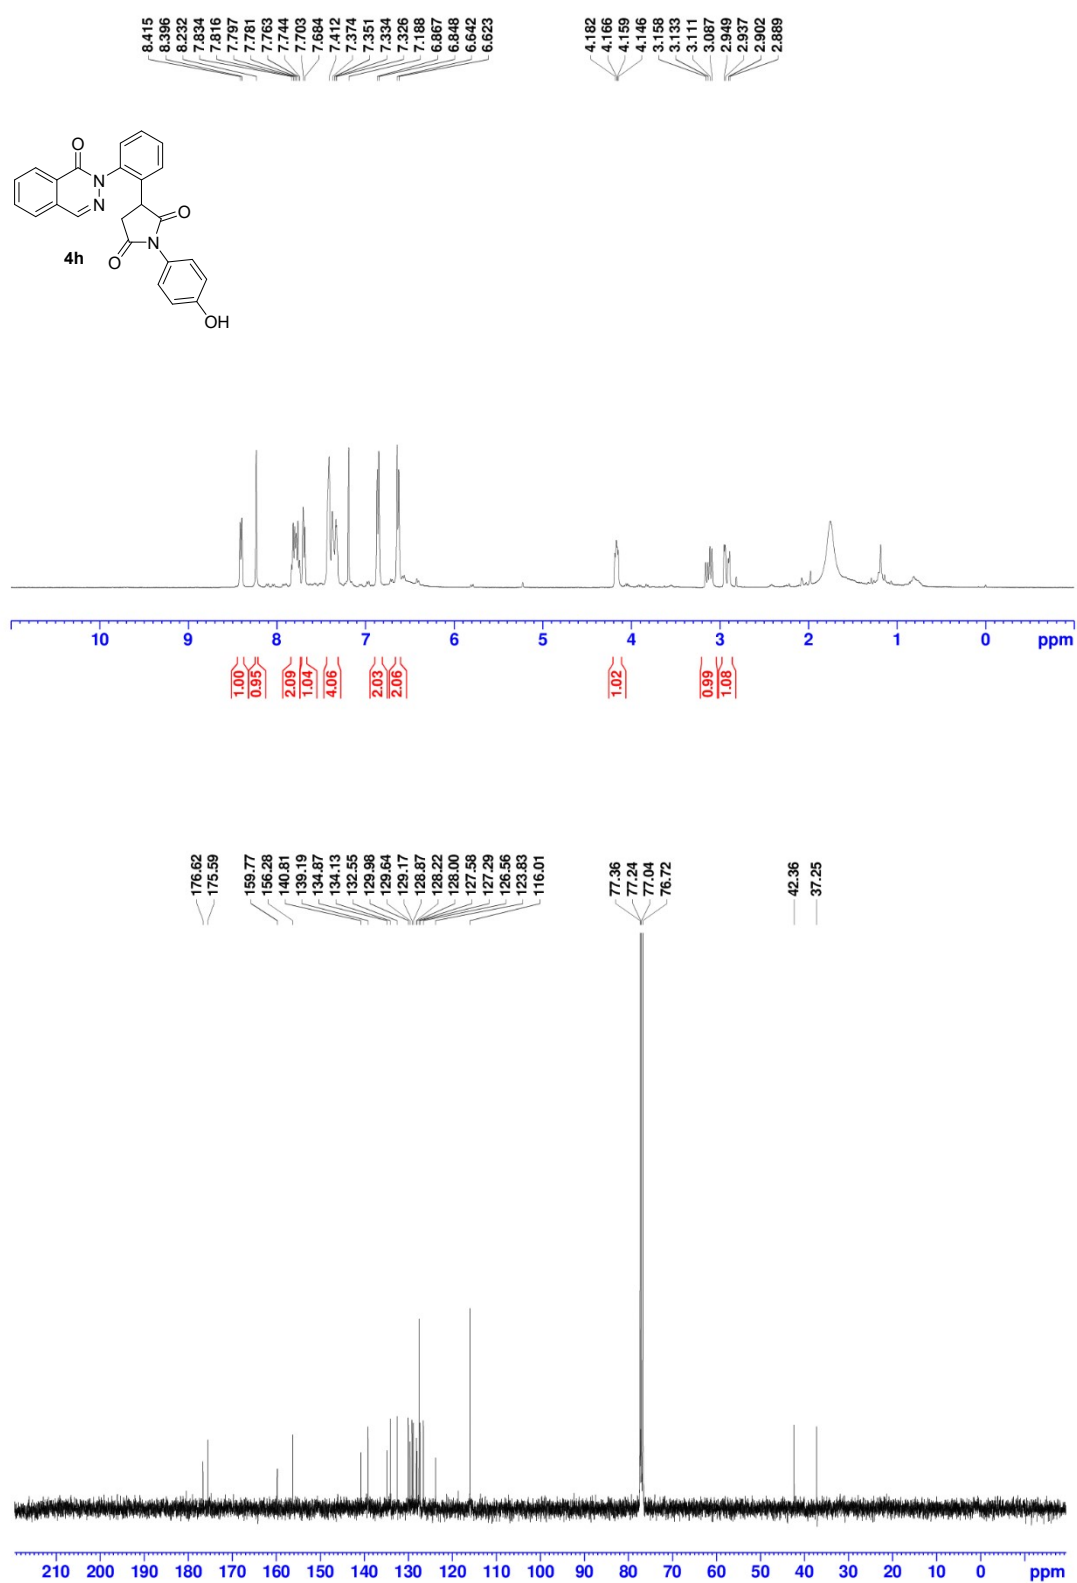

**$^1\text{H}$  and  $^{13}\text{C}$  NMR spectrum of 4i**

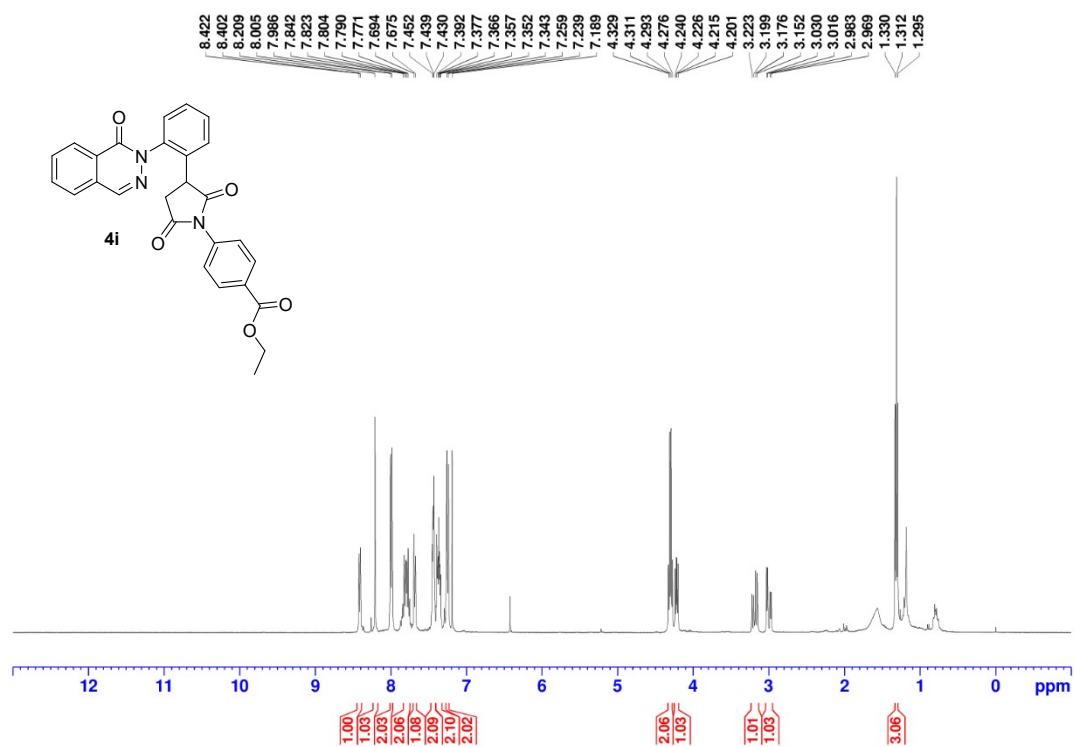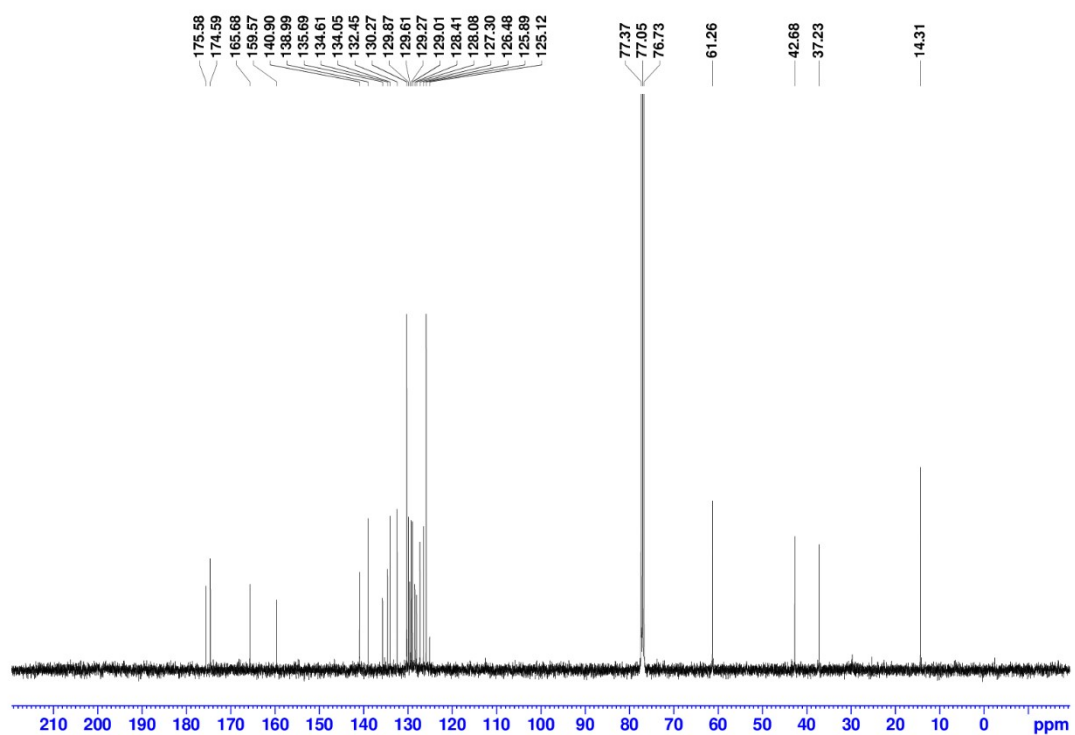

<sup>1</sup>H and <sup>13</sup>C NMR spectrum of 4j

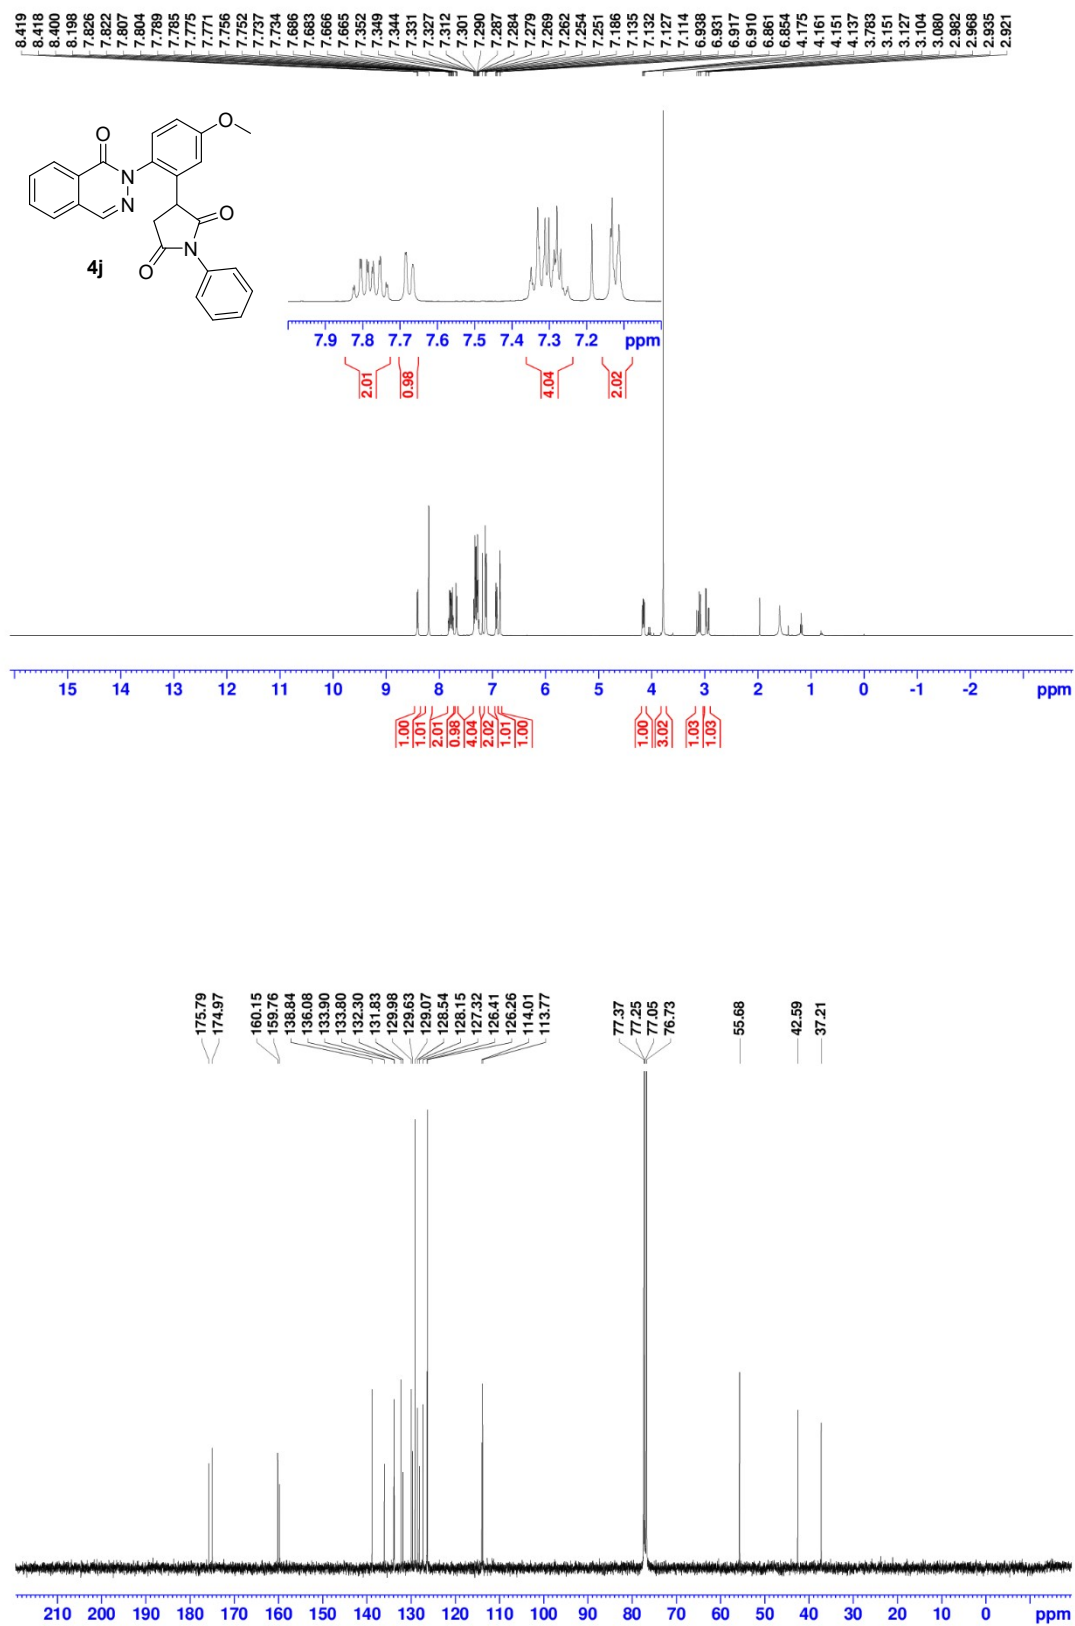

<sup>1</sup>H and <sup>13</sup>C NMR spectrum of 4k

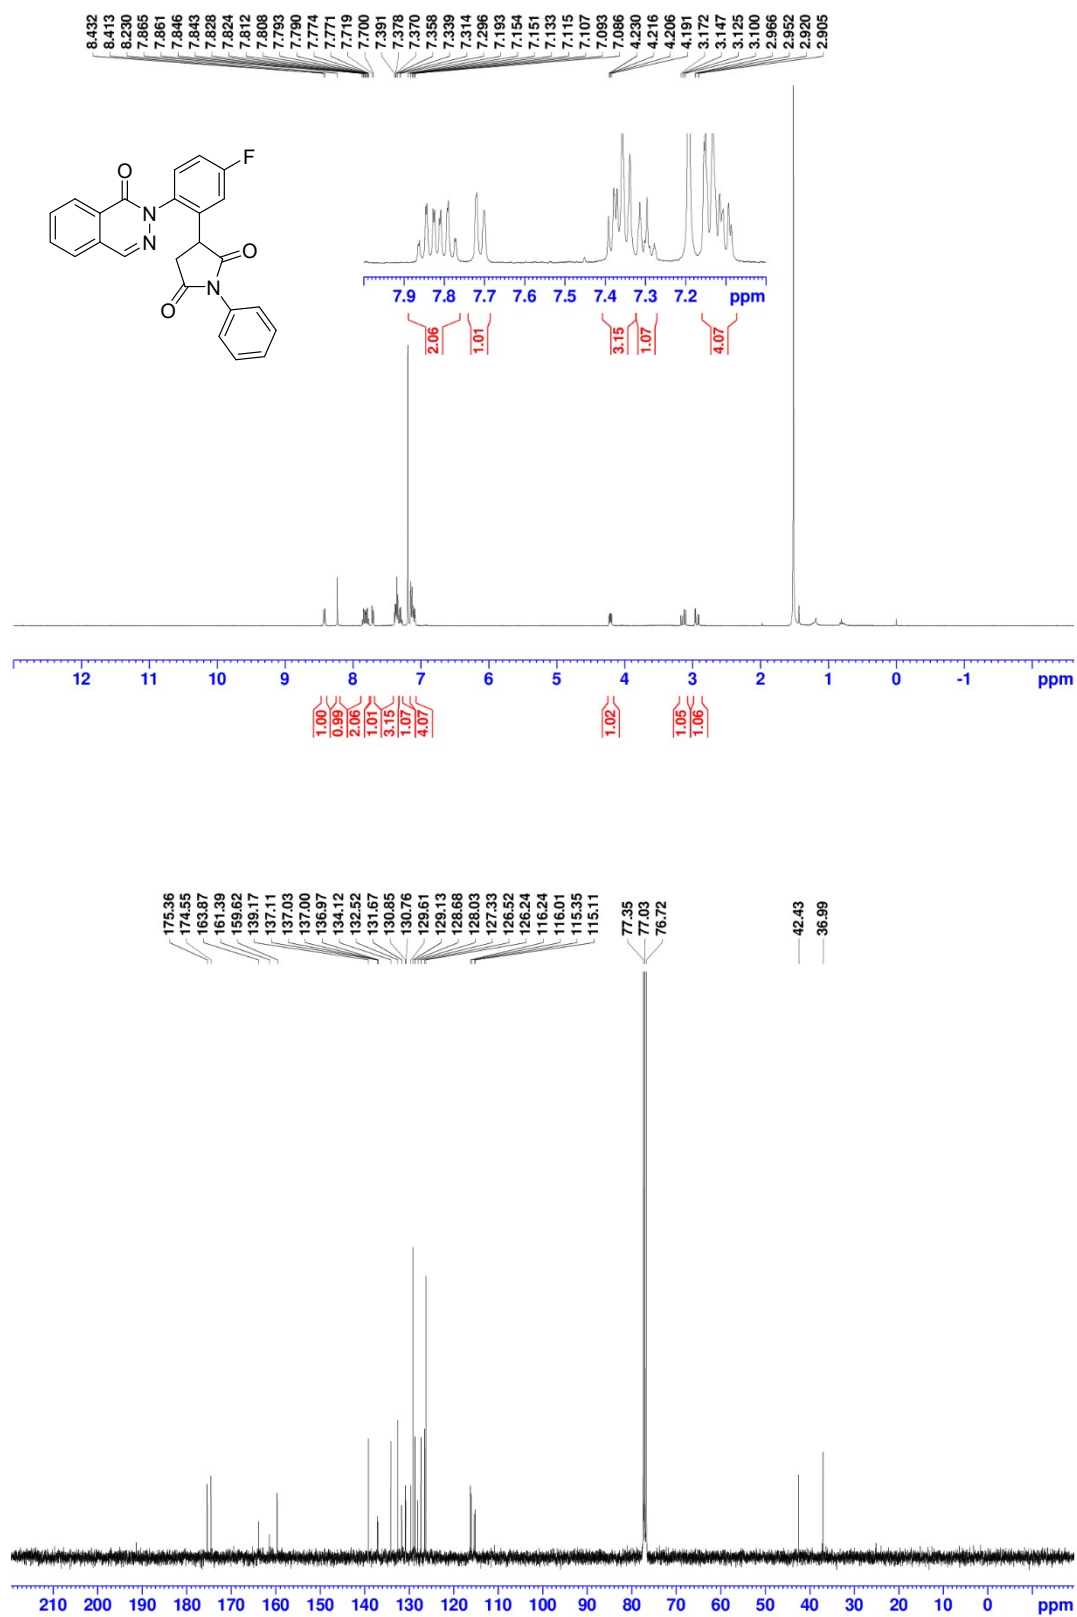

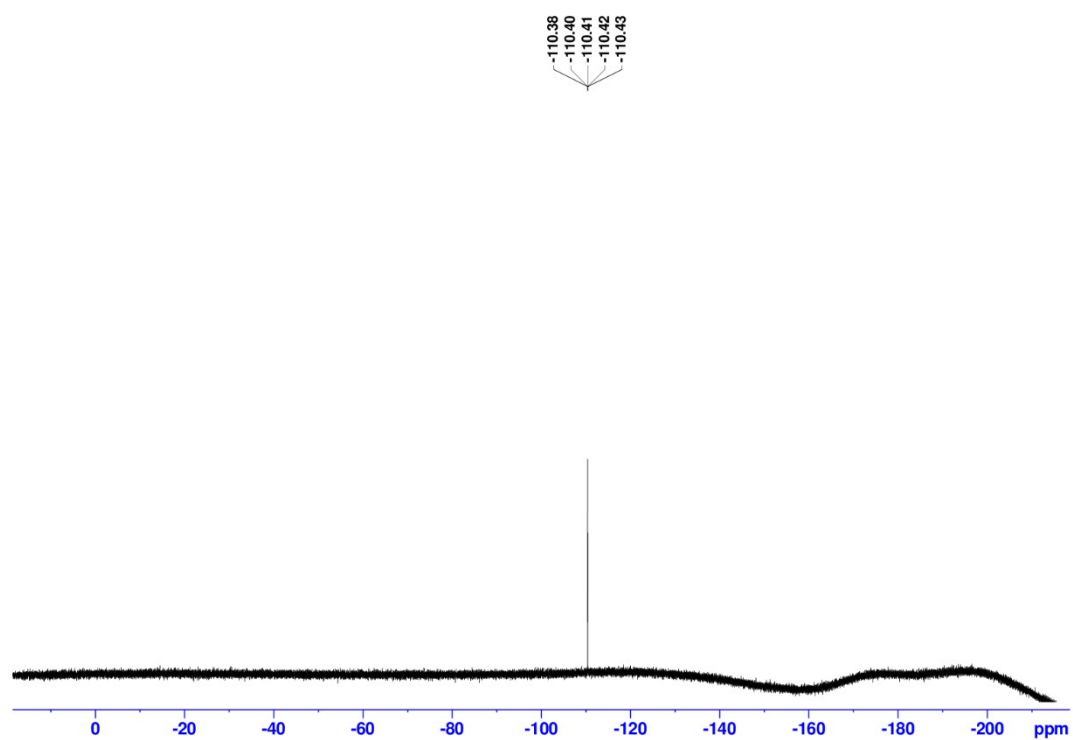

**$^1\text{H}$  and  $^{13}\text{C}$  NMR spectrum of 4l**

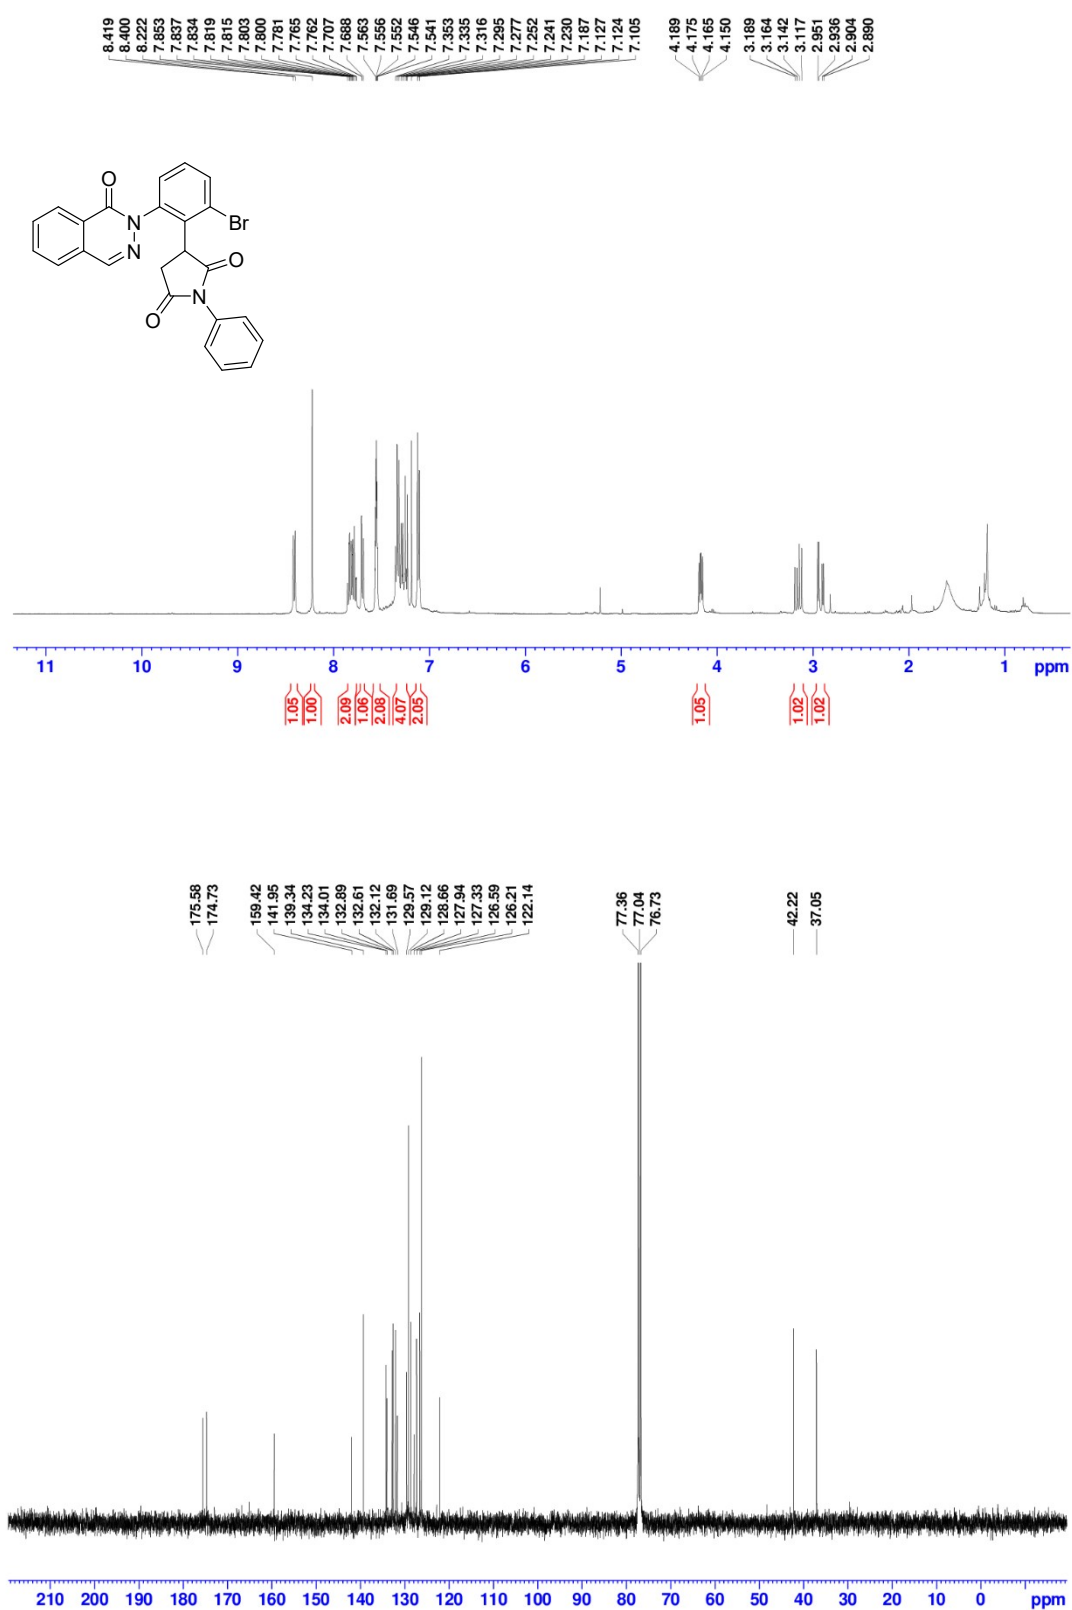

<sup>1</sup>H and <sup>13</sup>C NMR spectrum of 3p

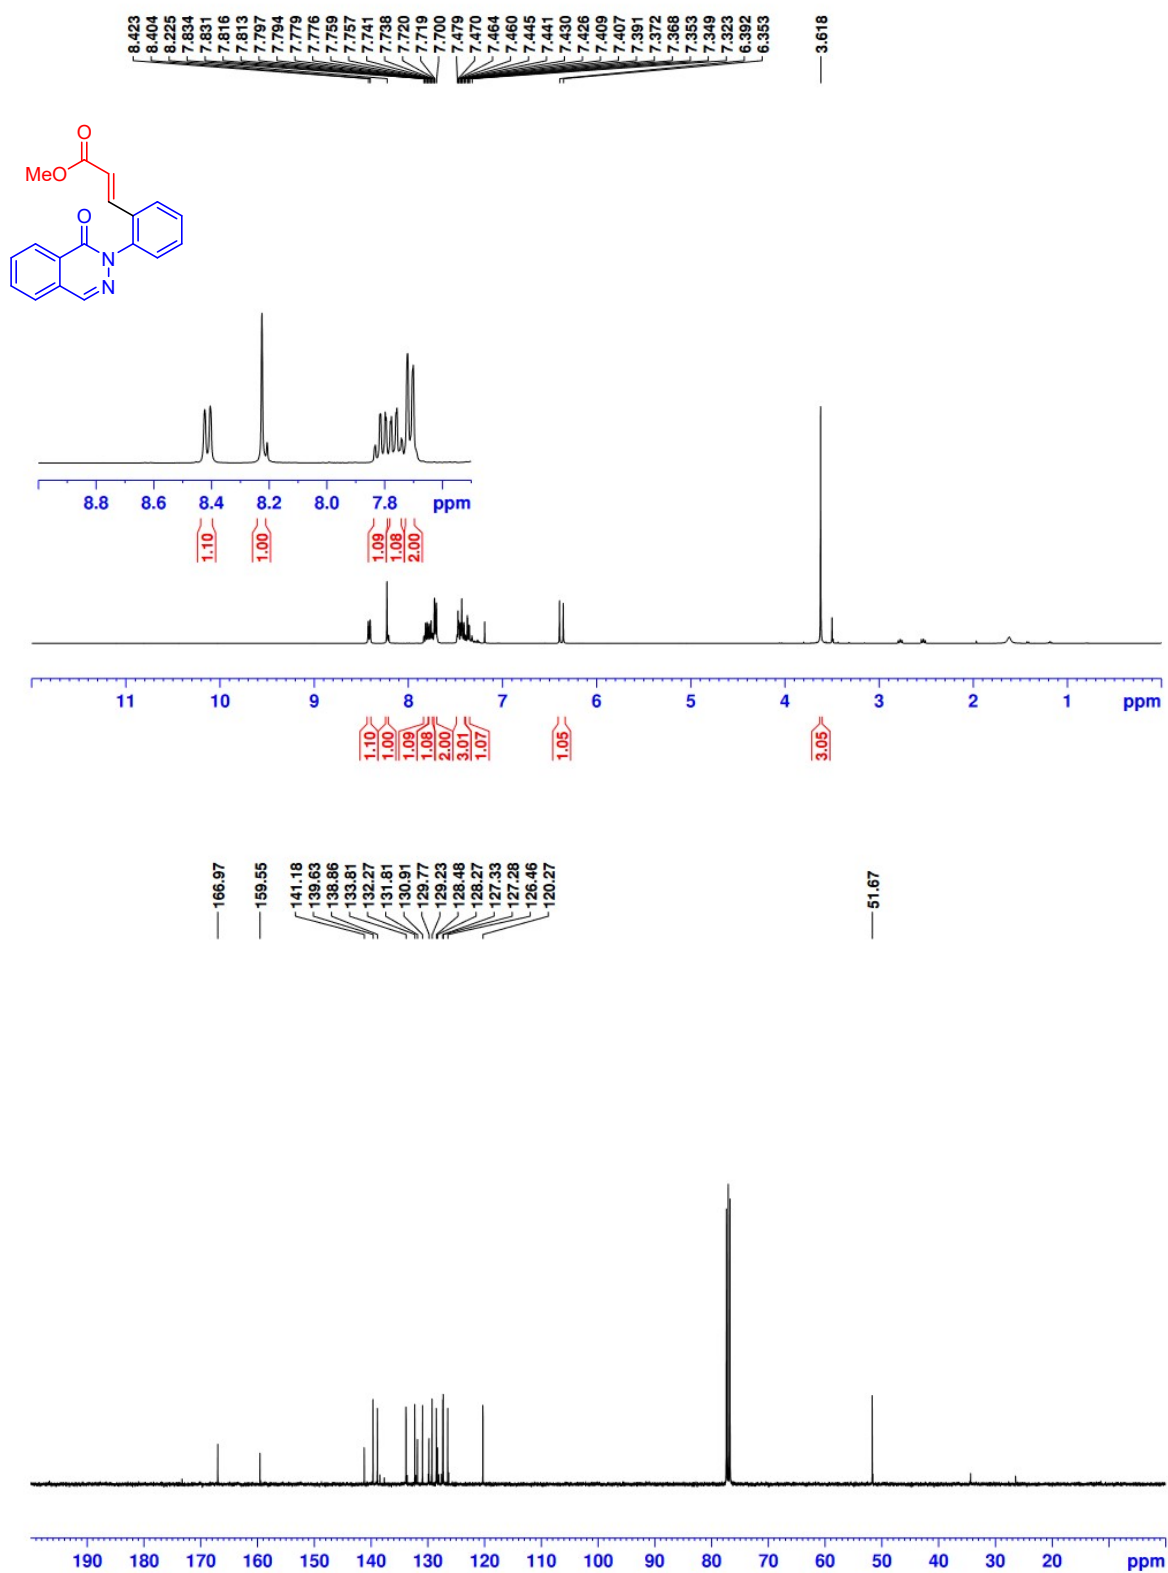

Supplement: d3ob00297g1.pdf [file d3ob00297g1.pdf]
